# Supplementary material
Source: publisher site journal article supplement (https://www.dovepress.com/article/335312)
Supplement: Supplementary file 1 [file 335312 Revised Table S1.pdf › 335312 Revised Table S1.pdf]

**Table S1. All metabolites obtained by UPLC-MS/MS.**

| NAME_EN                   | CLASS_EN            | KERNE1 | KERNE2 | KERNE3 | KERNE4 | KERNE5 | KERNE6 | PEEL-1 | PEEL-2 | PEEL-3 | PEEL-4 | PEEL-5 | PEEL-6 |
|---------------------------|---------------------|--------|--------|--------|--------|--------|--------|--------|--------|--------|--------|--------|--------|
| 1,5-Anhydro-D-glucitol    | Alcohols and polyol | 47750  | 61031  | 43254  | 34976  | 68812  | 144686 | 2457.4 | 3882   | 1962.5 | 1907   | 1932.7 | 2450.1 |
| D-Sorbitol                | Alcohols and polyol | 15564  | 19993  | 1342.5 | 23072  | 10644  | 8944   | 16305  | 604.69 | 0      | 14281  | 9490.5 | 21783  |
| 3-Dehydroquinate          | Alcohols and polyol | 6957.5 | 11908  | 8998.1 | 10085  | 11859  | 10544  | 7571.1 | 12662  | 6471.2 | 10845  | 23815  | 10176  |
| Trigonelline              | Alkaloids           | 9E+06  | 9E+06  | 1E+07  | 1E+07  | 4E+06  | 4E+06  | 9E+06  | 8E+06  | 6E+06  | 1E+07  | 5E+06  | 6E+06  |
| Sarracine                 | Alkaloids           | 5E+06  | 2E+06  | 2E+06  | 4E+06  | 4E+06  | 3E+06  | 3E+06  | 3E+06  | 2E+06  | 273080 | 484412 | 3E+06  |
| 3alpha,6beta-Ditigloyloxy | Alkaloids           | 5E+06  | 2E+06  | 2E+06  | 4E+06  | 4E+06  | 3E+06  | 3E+06  | 3E+06  | 2E+06  | 273080 | 484412 | 3E+06  |
| O-Acetyethanolamine       | Alkaloids           | 2E+06  | 2E+06  | 3E+06  | 2E+06  | 3E+06  | 3E+06  | 2E+06  | 3E+06  | 2E+06  | 3E+06  | 4E+06  | 4E+06  |
| Indole                    | Alkaloids           | 2E+06  | 1E+06  | 1E+06  | 2E+06  | 2E+06  | 1E+06  |
| Phyllalbine               | Alkaloids           | 686386 | 538578 | 586926 | 325654 | 490321 | 1E+06  | 5722.3 | 22927  | 0      | 3508.6 | 3187.6 | 16261  |
| DL-Alanine                | Alkaloids           | 951522 | 308884 | 329991 | 543582 | 353390 | 131238 | 54459  | 82835  | 46356  | 60515  | 50897  | 88558  |
| DL-Tyrosine               | Alkaloids           | 504655 | 537855 | 450472 | 378885 | 323340 | 50624  | 25483  | 136594 | 87473  | 173180 | 85005  | 56867  |
| Crotonoside               | Alkaloids           | 265485 | 340742 | 399768 | 687952 | 441241 | 62656  | 505376 | 692575 | 376093 | 556585 | 850357 | 521688 |
| D-Serine                  | Alkaloids           | 452872 | 332154 | 358753 | 371911 | 278112 | 322405 | 117074 | 135937 | 126240 | 123872 | 124897 | 146724 |
| D-Aspartic acid           | Alkaloids           | 393568 | 289522 | 204193 | 324747 | 171700 | 235535 | 208135 | 202027 | 150701 | 330728 | 193796 | 247421 |
| Methyl anthranilate       | Alkaloids           | 1859.1 | 229919 | 369010 | 3219.4 | 322992 | 2696.4 | 340529 | 536082 | 2943.5 | 317853 | 824499 | 361460 |
| Betaine                   | Alkaloids           | 176443 | 246291 | 42219  | 63429  | 62852  | 53913  | 414872 | 181830 | 54563  | 116277 | 86268  | 111437 |
| Cevadine                  | Alkaloids           | 108729 | 5697.8 | 93751  | 5906.7 | 143801 | 2760.6 | 122604 | 269989 | 48871  | 156367 | 196859 | 6022.1 |
| Isoquinoline              | Alkaloids           | 40798  | 44877  | 85471  | 59076  | 54284  | 31656  | 80417  | 91096  | 46762  | 33470  | 62288  | 43592  |
| Nicotinamide              | Alkaloids           | 42972  | 52002  | 39635  | 32950  | 61768  | 50512  | 23415  | 32420  | 58733  | 43226  | 41533  | 10822  |
| (-)-Cinchonidine          | Alkaloids           | 66405  | 27394  | 30852  | 39177  | 47999  | 42714  | 688285 | 3E+06  | 560477 | 1E+06  | 3E+06  | 512727 |
| Amabiline                 | Alkaloids           | 26119  | 9028.7 | 25745  | 55709  | 44906  | 30586  | 45072  | 53739  | 17151  | 20564  | 32423  | 17781  |
| Agrocybenine              | Alkaloids           | 25590  | 18876  | 25003  | 22468  | 14856  | 74720  | 12368  | 9573.1 | 2601.3 | 16067  | 15911  | 3703   |
| Calystegine A6            | Alkaloids           | 10445  | 73415  | 44920  | 28122  | 4697.4 | 9081.1 | 31782  | 54102  | 39409  | 33663  | 13632  | 18444  |
| 3-Methylindole            | Alkaloids           | 58026  | 16800  | 18242  | 25071  | 34445  | 13145  | 9452.5 | 7372.3 | 9791.4 | 23263  | 6112.3 | 5299.7 |
| (2S,3R,4E)-2-Amino-4-he   | Alkaloids           | 30000  | 15159  | 18637  | 30522  | 22334  | 27183  | 28755  | 16738  | 39961  | 31043  | 21747  | 31136  |
| Dhuririn                  | Alkaloids           | 32079  | 17096  | 22705  | 33245  | 22482  | 11178  | 37063  | 49653  | 17987  | 19495  | 29844  | 16570  |
| 8-Azabicyclo-3.2.1-octan- | Alkaloids           | 14357  | 16966  | 15083  | 30579  | 12272  | 37785  | 11387  | 12636  | 17824  | 22894  | 20387  | 9950.5 |
| Denudatine                | Alkaloids           | 22707  | 27757  | 21165  | 16307  | 21252  | 17429  | 12360  | 16754  | 12099  | 21207  | 14346  | 39858  |

|                                          |           |        |        |        |        |        |        |        |        |        |        |        |        |
|------------------------------------------|-----------|--------|--------|--------|--------|--------|--------|--------|--------|--------|--------|--------|--------|
| Vasicine                                 | Alkaloids | 51646  | 10247  | 13396  | 18726  | 19767  | 7226.6 | 4855.1 | 8878.5 | 4491.1 | 13940  | 5034.5 | 3329.7 |
| Cinchonine                               | Alkaloids | 10929  | 13510  | 26485  | 22709  | 25610  | 10497  | 557458 | 1E+06  | 335410 | 617942 | 1E+06  | 513824 |
| Kynurenic acid                           | Alkaloids | 17592  | 13754  | 15900  | 14515  | 36016  | 11033  | 9304.7 | 13947  | 25321  | 35630  | 13025  | 16016  |
| Arecaidine                               | Alkaloids | 18558  | 6394.4 | 6640.8 | 31057  | 21929  | 23170  | 4608.8 | 17534  | 18937  | 15105  | 17754  | 9714.2 |
| Synephrine                               | Alkaloids | 14143  | 35618  | 10575  | 11541  | 10765  | 24850  | 11457  | 21912  | 15847  | 13336  | 8081.1 | 11384  |
| Talatisamine                             | Alkaloids | 9736.5 | 13038  | 21426  | 12861  | 14737  | 24215  | 11977  | 24964  | 12320  | 20770  | 10547  | 13759  |
| L-Nicotine                               | Alkaloids | 21993  | 15692  | 9263.1 | 11805  | 14915  | 5828.6 | 43603  | 9604.2 | 12285  | 11408  | 34300  | 12849  |
| Nordihydrocapsaicin                      | Alkaloids | 20737  | 3803.1 | 12601  | 16408  | 11384  | 13993  | 17982  | 9339.2 | 5197.8 | 16743  | 20904  | 8129.3 |
| Pseudotropine                            | Alkaloids | 28417  | 18163  | 9919.2 | 2672   | 10308  | 7086.7 | 12982  | 5671.8 | 11424  | 4315.2 | 5564.1 | 29675  |
| Methylisopelletierine                    | Alkaloids | 16966  | 10452  | 6680.6 | 19948  | 11023  | 11213  | 13485  | 8018.7 | 9017.5 | 9812.9 | 7157.5 | 9842.6 |
| 3-Methyl-1-butylamine                    | Alkaloids | 4976.9 | 6410   | 10036  | 7847.4 | 13982  | 11207  | 18518  | 13947  | 11455  | 16319  | 8539.7 | 10010  |
| 3-(Carboxymethylamino)p<br>indolin-2-one | Alkaloids | 5923.1 | 6232.4 | 6400.4 | 11565  | 13405  | 7104.6 | 2453.3 | 12467  | 7959.2 | 8785.1 | 3513.2 | 2057.2 |
| Hordenine                                | Alkaloids | 6831.6 | 5504   | 18605  | 5673.8 | 7146.6 | 6455   | 3914.9 | 5799.1 | 13627  | 8815.4 | 7707.2 | 4621.4 |
| Tacrolimus                               | Alkaloids | 5520.2 | 3378.9 | 9388.4 | 10565  | 14630  | 6566.7 | 5510.5 | 6413.3 | 11214  | 8213   | 6090   | 9624.6 |
| Cochlearine                              | Alkaloids | 10057  | 6648.3 | 6004   | 7764.2 | 9750.8 | 9396.3 | 13086  | 20651  | 7822.3 | 4084   | 19878  | 712.45 |
| Solasodine                               | Alkaloids | 10672  | 4858.8 | 6450.4 | 10637  | 13000  | 3421.5 | 23353  | 13920  | 8177.1 | 7193.1 | 7399.5 | 4334.8 |
| 3-Hydroxy-2-methylpyridi                 | Alkaloids | 10523  | 3580.7 | 12400  | 3876.6 | 12985  | 5529.4 | 9510   | 10792  | 11953  | 6228.2 | 11809  | 5576.7 |
| Norepinephrine                           | Alkaloids | 8307.7 | 12685  | 9461.7 | 4868.5 | 3723.7 | 9598.8 | 3437.7 | 4457.6 | 5076.8 | 4142.2 | 4301.3 | 4285.2 |
| N-p-Coumaroyloctopamin                   | Alkaloids | 3067.4 | 6331.9 | 11259  | 10248  | 11720  | 4729.4 | 10646  | 5473.1 | 6408.4 | 9592.6 | 2843.7 | 6568.1 |
| Gramine                                  | Alkaloids | 7553.1 | 11286  | 9143.2 | 4323.4 | 4932.9 | 6442.8 | 13306  | 11342  | 11297  | 7704.2 | 11072  | 8974.7 |
| Dihydrocapsaicin                         | Alkaloids | 4931.6 | 6853.5 | 4523.5 | 11086  | 8852.5 | 5360.7 | 12363  | 13072  | 10409  | 7270.9 | 7280.6 | 5456.3 |
| Pilocarpine                              | Alkaloids | 8542.3 | 4010.3 | 3037.2 | 5495.9 | 10140  | 10293  | 11732  | 4695.2 | 3900.5 | 8393.5 | 6714.6 | 2335.5 |
| Theobromine                              | Alkaloids | 3147.8 | 5664.3 | 13209  | 4082.7 | 5005   | 8616.3 | 1877.2 | 13275  | 4746.3 | 3155.1 | 10251  | 5323.3 |
| Knightinol                               | Alkaloids | 5062.6 | 6672.6 | 6152.7 | 5377.7 | 6835.2 | 7970.8 | 9071.4 | 15339  | 6391   | 8342.2 | 8876.1 | 12337  |
| Piperidine                               | Alkaloids | 12207  | 3470.1 | 2897.4 | 6020   | 4321   | 6927.4 | 2091.5 | 428.74 | 0      | 0      | 0      | 1879.5 |
| Bellendine                               | Alkaloids | 7205.6 | 3672.7 | 4360.5 | 5431.6 | 5305.5 | 6111.7 | 2088.7 | 2540.1 | 2819.5 | 5494.6 | 1444.9 | 3508.7 |
| 2-Hydroxypyridine                        | Alkaloids | 12646  | 2911.9 | 2658.8 | 5038.4 | 5353.5 | 3106.3 | 4152.6 | 8315.3 | 4569.2 | 4355.8 | 3167.9 | 4000.6 |
| Tropine acetate                          | Alkaloids | 7513.2 | 6597.2 | 3653.8 | 5484.2 | 4374.8 | 3911.4 | 2601.8 | 7382.5 | 5543.1 | 3512.6 | 6031.8 | 4031.8 |
| Gentioflavin                             | Alkaloids | 5119.8 | 3842.4 | 4177.9 | 5618   | 4217.2 | 8202.4 | 4609.1 | 2619.6 | 2647.1 | 3766.3 | 3836   | 3182.8 |
| Angustifoline                            | Alkaloids | 0      | 4457.4 | 4500.1 | 7072.7 | 5477.3 | 8952.5 | 8118.6 | 4030.3 | 4486.3 | 643.7  | 3789.2 | 4645.4 |
| 5-Hydroxytryptophan                      | Alkaloids | 1211.3 | 6622.6 | 6486.9 | 6611.6 | 4504.2 | 3796.2 | 3113.1 | 3510   | 2973.9 | 3018   | 4889.4 | 4208.7 |
|                                          |           | 6277.9 | 7490.3 | 5058.3 | 2430.4 | 3421.6 | 4079.1 | 2792.5 | 4788.6 | 6264.7 | 4083.9 | 2401.4 | 2463.4 |

|                           |           |        |        |        |        |        |        |        |        |        |        |        |        |
|---------------------------|-----------|--------|--------|--------|--------|--------|--------|--------|--------|--------|--------|--------|--------|
| Melatonin                 | Alkaloids | 6160.7 | 5728.7 | 2998   | 0      | 10404  | 1557.1 | 4180.7 | 3800   | 3079.4 | 3099.9 | 1684.8 | 4107.5 |
| Theophylline              | Alkaloids | 6006   | 4660.4 | 3985.4 | 2709.6 | 3461.7 | 4300   | 6301.2 | 5568.4 | 5155.8 | 6532   | 6443.6 | 4830.6 |
| Bufotenine                | Alkaloids | 5655.7 | 5761.5 | 5117.7 | 3717.6 | 1829   | 2317.4 | 3322.8 | 3753.9 | 5624.8 | 2409.4 | 1832   | 3020.8 |
| Protoveratrine A          | Alkaloids | 7004.7 | 8823.2 | 0      | 3266.5 | 1570.5 | 3424.9 | 9503.8 | 8489   | 19990  | 4929.5 | 3046.3 | 0      |
| Lumichrome                | Alkaloids | 2615.2 | 5872.8 | 5517.6 | 1770.4 | 863.1  | 6852.2 | 10648  | 3376.4 | 13540  | 7536.1 | 10572  | 862.21 |
| Dictamnine                | Alkaloids | 2769.6 | 2238.8 | 4828.1 | 4648.1 | 2775.7 | 5650.3 | 3471.6 | 9078.3 | 5706.3 | 3629.7 | 5130.1 | 8055.9 |
| 6-(Furfurylamino)purine   | Alkaloids | 2073.2 | 3397.4 | 3600.5 | 2610.7 | 3292.6 | 4985.7 | 1557.5 | 4458.1 | 1913.6 | 617.22 | 4460.4 | 1902.4 |
| Acetylcholine chloride    | Alkaloids | 2221.3 | 6594.6 | 3338.1 | 1992.4 | 1779.7 | 3735.2 | 1170.8 | 2933.7 | 4974.4 | 2335.9 | 2740.4 | 5504.2 |
| Mitraphylline             | Alkaloids | 1983   | 1068.2 | 1041.1 | 3868   | 6781.7 | 4862.4 | 5901.4 | 3545   | 2927.3 | 5303.3 | 7492.8 | 3225.3 |
| (-)-Huperzine A           | Alkaloids | 4646.1 | 1249.3 | 1917.5 | 7060.9 | 594.74 | 3814.5 | 7867.5 | 585.25 | 4119.3 | 643.52 | 1824.5 | 1194.6 |
| Abrine                    | Alkaloids | 3858.2 | 1931.3 | 3835   | 5233.7 | 2462.1 | 1873.5 | 5092.3 | 8162.1 | 5681.8 | 6180.7 | 5144   | 1768.5 |
| Allocryptopine            | Alkaloids | 963.38 | 1189.6 | 2415.8 | 7808.6 | 3035.6 | 2058.1 | 4157.5 | 3450.2 | 2323.1 | 2401.8 | 6259.3 | 653.71 |
| Tryptophan                | Alkaloids | 0      | 7208.7 | 0      | 0      | 4301.3 | 5579.5 | 1942.9 | 1794.6 | 2301   | 5860.4 | 1910.2 | 0      |
| Oxoglaucine               | Alkaloids | 4504.5 | 1102.1 | 482.35 | 3786.5 | 4173.7 | 1310.6 | 3842.3 | 6754.3 | 3257.8 | 1578   | 11696  | 1824.8 |
| Harman                    | Alkaloids | 2327   | 3453.1 | 1776.2 | 2288.9 | 1941.3 | 3228.8 | 10958  | 5422.7 | 7499   | 4039.5 | 7078.3 | 5108   |
| Cytisine                  | Alkaloids | 5946.4 | 887.04 | 3593   | 0      | 2393.8 | 1435.4 | 867.1  | 2085.7 | 1930.7 | 1489.2 | 873.65 | 653.65 |
| Yohimbic acid monohydra   | Alkaloids | 5041.3 | 462.54 | 831.27 | 2177.6 | 5400.4 | 266.07 | 3615.3 | 8297.5 | 2001.3 | 1761.8 | 1858.3 | 1295.8 |
| Riddelline                | Alkaloids | 2309.7 | 1108.1 | 1086.9 | 3030.6 | 4626.6 | 1974.2 | 3928.4 | 5655.6 | 4001.6 | 4966.5 | 2398.8 | 1777.3 |
| 8-Amino-7-oxononanoic a   | Alkaloids | 3359.8 | 673.23 | 2262.5 | 2562.8 | 2120.4 | 2445.9 | 1651.1 | 3834   | 648.62 | 998.09 | 1603   | 4740.2 |
| Tombozine                 | Alkaloids | 2524.6 | 955.71 | 2195.9 | 4108.8 | 1387.7 | 1983.8 | 994.45 | 2959   | 670.11 | 656.25 | 664.86 | 4380.6 |
| Grossamide                | Alkaloids | 5348   | 335.87 | 1005.3 | 2029.5 | 0      | 4032.1 | 2557.9 | 2715.8 | 1009.4 | 3434.2 | 3332.6 | 1452.4 |
| Harmaline                 | Alkaloids | 1383   | 1055.8 | 848.67 | 3271.3 | 4454   | 1296.5 | 1719.8 | 4724.5 | 3997.8 | 2203.9 | 4133.7 | 3539.9 |
| Oxymatrine                | Alkaloids | 1833.3 | 3080   | 1406.9 | 1992.6 | 2817.3 | 761.95 | 1814.8 | 1469.8 | 1431.1 | 1401.1 | 2395.3 | 2675.5 |
| Benzoyltropein            | Alkaloids | 1788   | 4248.5 | 1202.3 | 2518.3 | 1138.5 | 615.05 | 8739.2 | 0      | 2359.1 | 1859.5 | 4337   | 4303.2 |
| (-)-Anonaine              | Alkaloids | 683    | 713.16 | 2395.4 | 2146.1 | 3514.8 | 1424.1 | 1341.8 | 686.07 | 1705.8 | 447.58 | 1578.8 | 777.52 |
| Otonecine                 | Alkaloids | 2195.6 | 1502.5 | 1775   | 1886.2 | 2049.2 | 908.97 | 1591.9 | 2882.1 | 2795.1 | 2629.5 | 1650.9 | 1469.5 |
| Rivularine                | Alkaloids | 2998.9 | 2230.4 | 909.87 | 1872.8 | 756.37 | 1037.4 | 2107.3 | 1756.1 | 1931.3 | 736.88 | 1250.1 | 2500.3 |
| Desoxypeganine            | Alkaloids | 4654.2 | 717.09 | 670.41 | 665.68 | 748.89 | 1600.3 | 1464.7 | 2966.2 | 3598.7 | 5448.7 | 709.2  | 1752.8 |
| 1H-Indole-3-carboxylic ac | Alkaloids | 1789.4 | 982.9  | 1629.2 | 2237   | 1205.9 | 1096.6 | 2987.5 | 4246.8 | 4837.4 | 3728.9 | 2713.9 | 5665.6 |
| Matrine                   | Alkaloids | 424    | 1810.8 | 1403   | 2196.8 | 1364.9 | 1708.4 | 633.59 | 2907.3 | 846.17 | 2495.1 | 1245.7 | 3286.7 |
| Huperzine B               | Alkaloids | 500.48 | 1779.5 | 0      | 3448.9 | 1006.1 | 988.85 | 1022.6 | 1808.8 | 2626.4 | 3006.5 | 2252.5 | 723.45 |
| Narciclasine              | Alkaloids | 1570.1 | 696    | 1131.4 | 1155.3 | 1130.7 | 1980.3 | 4116.9 | 2555.6 | 221.69 | 1592.1 | 902.25 | 1119.5 |

|                           |                     |        |        |        |        |        |        |        |        |        |        |        |        |
|---------------------------|---------------------|--------|--------|--------|--------|--------|--------|--------|--------|--------|--------|--------|--------|
| Calystegine B2            | Alkaloids           | 612.37 | 2138.4 | 872.74 | 1227.7 | 900.38 | 1890.2 | 1230.3 | 2205   | 612.37 | 4291.1 | 3331   | 748.99 |
| (-)-Sedamine              | Alkaloids           | 0      | 0      | 3024.1 | 0      | 3031.4 | 693.47 | 5397   | 6628.3 | 1190.6 | 564.6  | 3966.4 | 1779   |
| Astrocasine               | Alkaloids           | 1418   | 621.85 | 565.29 | 1534.9 | 1232.1 | 711.22 | 1103   | 697.71 | 1172.6 | 886.51 | 1408.2 | 1567.8 |
| Anacrotine                | Alkaloids           | 622.35 | 2580.9 | 597.73 | 909.33 | 785.76 | 0      | 393.79 | 1713.2 | 1706.8 | 216.81 | 2667   | 1365.5 |
| 4-Aminoantipyrine         | Alkaloids           | 1451   | 796.97 | 349.22 | 847.94 | 1303.9 | 431.97 | 2289.9 | 1594.4 | 1577.1 | 719.11 | 1404.5 | 527.01 |
| Platyphylline             | Alkaloids           | 227.77 | 2386   | 472.46 | 245.48 | 956.97 | 685.01 | 2022.7 | 1194.7 | 1820   | 2737.6 | 2140.6 | 2161   |
| Perakine                  | Alkaloids           | 759.57 | 0      | 0      | 263    | 3060.1 | 776.9  | 503.42 | 8043.9 | 2500   | 1029   | 1013   | 0      |
| Tabersonine               | Alkaloids           | 0      | 419.05 | 420.88 | 0      | 0      | 1345.1 | 4705.4 | 5187.8 | 3712.9 | 3618.7 | 3693.5 | 3938.2 |
| Arecoline                 | Alkaloids           | 3E+07  | 3E+07  | 4E+07  | 4E+07  | 4E+07  | 4E+07  | 1E+07  | 1E+07  | 2E+07  | 8E+06  | 2E+07  | 1E+07  |
| L-Arginine                | Amino acid and deri | 1E+08  | 1E+08  | 1E+08  | 1E+08  | 2E+08  | 9E+06  | 1E+07  | 8E+07  | 1E+07  | 3E+07  | 2E+07  | 2E+07  |
| L-Phenylalanine           | Amino acid and deri | 3E+07  | 9E+07  | 5E+07  | 1E+08  | 1E+07  | 930611 | 537288 | 1E+06  | 648865 | 800532 | 620732 | 512844 |
| Proline                   | Amino acid and deri | 1E+07  | 1E+07  | 1E+07  | 1E+07  | 8E+06  | 2E+06  | 1E+06  | 5E+06  | 1E+06  | 4E+06  | 6E+06  | 3E+06  |
| L-Citruline               | Amino acid and deri | 1E+07  | 4E+06  | 7E+06  | 1E+07  | 8E+06  | 2E+06  | 3E+06  | 2E+07  | 5E+06  | 9E+06  | 9E+06  | 7E+06  |
| L-Lysine                  | Amino acid and deri | 1E+07  | 3E+06  | 4E+06  | 9E+06  | 3E+06  | 5E+06  | 2E+06  | 4E+06  | 1E+06  | 2E+06  | 5E+06  | 4E+06  |
| L-Glutamic acid           | Amino acid and deri | 5E+06  | 4E+06  | 5E+06  | 5E+06  | 5E+06  | 6E+06  | 2E+06  | 2E+06  | 2E+06  | 3E+06  | 2E+06  | 2E+06  |
| L-Pipecolic acid          | Amino acid and deri | 4E+06  | 3E+06  | 5E+06  | 4E+06  | 3E+06  | 3E+06  | 1E+06  | 3E+06  | 1E+06  | 2E+06  | 3E+06  | 3E+06  |
| L-Histidine               | Amino acid and deri | 1E+06  | 1E+06  | 957248 | 1E+06  | 707937 | 421712 | 236643 | 609844 | 341724 | 313747 | 461384 | 336685 |
| L-Serine                  | Amino acid and deri | 452872 | 332154 | 358753 | 371911 | 278112 | 322405 | 117074 | 135937 | 126240 | 123872 | 124897 | 146724 |
| 5-Aminovaleric acid       | Amino acid and deri | 453765 | 604133 | 249203 | 431604 | 156532 | 61035  | 21648  | 51253  | 24504  | 41187  | 44637  | 50974  |
| L-Aspartic acid           | Amino acid and deri | 393568 | 289522 | 204193 | 324747 | 171700 | 314406 | 208135 | 254310 | 150701 | 330728 | 193796 | 247421 |
| 2-Aminoisobutyric acid    | Amino acid and deri | 265671 | 296774 | 112240 | 282838 | 426675 | 224150 | 101218 | 496017 | 106174 | 455847 | 550055 | 447237 |
| N6-Acetyl-L-lysine        | Amino acid and deri | 224316 | 348716 | 222470 | 381397 | 157222 | 65439  | 175266 | 543727 | 199275 | 494466 | 59317  | 319407 |
| L-Glutamine               | Amino acid and deri | 158513 | 194139 | 170743 | 391769 | 103306 | 304461 | 113214 | 249742 | 100672 | 88205  | 513628 | 405889 |
| L-Homoglutamic acid       | Amino acid and deri | 290032 | 250916 | 198801 | 257896 | 144720 | 70559  | 14393  | 15563  | 7971.6 | 4391.6 | 6703.4 | 16060  |
| CYS-GLY                   | Amino acid and deri | 21640  | 1693.4 | 2592.5 | 616901 | 409685 | 1047.4 | 63422  | 86408  | 142235 | 364698 | 97968  | 123399 |
| N,N-Dimethylglycine       | Amino acid and deri | 265671 | 296774 | 112240 | 54968  | 86203  | 146188 | 101218 | 304005 | 106174 | 93026  | 133796 | 447237 |
| L-Homoserine              | Amino acid and deri | 173399 | 156943 | 134051 | 81911  | 141671 | 63840  | 44408  | 78845  | 66586  | 54298  | 53661  | 56668  |
| L-Methionine              | Amino acid and deri | 178854 | 148829 | 63898  | 160538 | 90924  | 23473  | 11266  | 8386.3 | 6779.1 | 5717.7 | 11928  | 12181  |
| L-Threonine               | Amino acid and deri | 173399 | 132638 | 109744 | 81911  | 87397  | 53391  | 43100  | 78845  | 66586  | 39915  | 53661  | 56668  |
| 5-oxoproline              | Amino acid and deri | 82035  | 59171  | 58363  | 77581  | 47669  | 52263  | 118902 | 203310 | 136437 | 161847 | 173443 | 177451 |
| trans-4-Hydroxy-L-proline | Amino acid and deri | 60406  | 56824  | 67878  | 94072  | 24577  | 54415  | 15302  | 43391  | 21650  | 15793  | 16216  | 30994  |
| L-Isoleucine              | Amino acid and deri | 29426  | 92036  | 49299  | 49921  | 48360  | 10332  | 15823  | 32810  | 18261  | 22281  | 28946  | 18920  |

|                          |                      |        |        |        |        |        |        |        |        |        |        |        |        |
|--------------------------|----------------------|--------|--------|--------|--------|--------|--------|--------|--------|--------|--------|--------|--------|
| Isoleucine               | Amino acid and deri  | 29426  | 92036  | 49299  | 49921  | 48360  | 5520.2 | 15823  | 32810  | 18261  | 22281  | 28946  | 18920  |
| L-Norleucine             | Amino acid and deri  | 29426  | 92036  | 49299  | 49921  | 46467  | 5520.2 | 8300.1 | 42517  | 18261  | 22281  | 19438  | 18920  |
| L-Asparagine             | Amino acid and deri  | 26446  | 19510  | 26745  | 29920  | 26972  | 35068  | 48809  | 112810 | 32327  | 41989  | 110356 | 70307  |
| S-Adenosylmethionine     | Amino acid and deri  | 33119  | 19491  | 22586  | 26502  | 33948  | 16723  | 9137.6 | 20818  | 0      | 55733  | 16880  | 0      |
| Allysine(6-Oxo DL-Norleu | Amino acid and deri  | 41510  | 23870  | 33575  | 19956  | 16797  | 14078  | 35797  | 33397  | 29302  | 29008  | 30933  | 29818  |
| N-Acetyl-L-phenylalanine | Amino acid and deri  | 0      | 0      | 0      | 125098 | 392.98 | 0      | 0      | 22295  | 0      | 24361  | 21556  | 18276  |
| N-formylmethionine       | Amino acid and deri  | 6265.3 | 13224  | 5492.5 | 3321.3 | 7512.8 | 26465  | 9752.4 | 8347   | 2052.9 | 10632  | 7313.8 | 14174  |
| L-Theanine               | Amino acid and deri  | 1861.6 | 25578  | 6950.8 | 4626   | 16943  | 3265.5 | 55206  | 3211.4 | 42832  | 9970.8 | 73296  | 38088  |
| D-Alanyl-D-Alanine       | Amino acid and deri  | 9367   | 9258.7 | 5689.8 | 4770.9 | 7799.2 | 5984.7 | 7128.9 | 4883.4 | 4283.5 | 5919   | 7582.9 | 11943  |
| N-Acetyl-L-glutamic acid | Amino acid and deri  | 4811   | 5943.9 | 3339.7 | 7562.7 | 3678.7 | 12849  | 6318   | 4268.8 | 3879   | 6924.6 | 6993.9 | 8382.2 |
| L-Homocitrulline         | Amino acid and deri  | 7949.5 | 4792.6 | 4572   | 5736.8 | 9285   | 2242.1 | 10246  | 6103.1 | 22732  | 3479.2 | 14419  | 5894   |
| N-Acetyl-l-leucine       | Amino acid and deri  | 4513.7 | 7419.3 | 5506.8 | 4744.8 | 8458   | 3177.5 | 8314.8 | 6496.2 | 3566.7 | 3714.4 | 6773   | 6266.4 |
| L-Ornithine              | Amino acid and deri  | 3233.9 | 3751.8 | 9610.9 | 5826.5 | 2613.1 | 4607.8 | 6030.4 | 3688.8 | 4644.1 | 7615.9 | 5133.5 | 3705.9 |
| Phenylacetylglycine      | Amino acid and deri  | 5885.3 | 4422.4 | 3818.9 | 5481.1 | 6102.6 | 1262.6 | 5983.9 | 3457.3 | 4468.6 | 2875   | 9111.5 | 6064.5 |
| Glutathione              | Amino acid and deri  | 2422.7 | 0      | 2860.7 | 7917   | 6380.2 | 4941.7 | 7178.3 | 6124.1 | 2825.9 | 6472   | 11057  | 4384   |
| Phenylacetyl-L-glutamine | Amino acid and deri  | 3030.6 | 1215.3 | 2983.5 | 5765.4 | 6837.6 | 3321.9 | 7003.9 | 4141.8 | 6979.7 | 6157.6 | 3042.6 | 4982.4 |
| 3-Aminoisobutanoic acid  | Amino acid and deri  | 13089  | 1803.1 | 1641.8 | 3154.6 | 1646.4 | 1166.7 | 18357  | 778.4  | 1155.9 | 15778  | 2197.3 | 29847  |
| Tyramine                 | Amino acid and deri  | 5333.6 | 2791.3 | 4003.6 | 1777.3 | 2689.2 | 4889.5 | 5976.9 | 2166.5 | 2395.7 | 4250.4 | 2756.7 | 3961.7 |
| N'-Formylkynurenine      | Amino acid and deri  | 1391.2 | 2145.2 | 2521.2 | 6027.3 | 4878.8 | 2170   | 5153.2 | 2441.8 | 3959.4 | 3592.4 | 5676   | 4053.8 |
| Levodopa                 | Amino acid and deri  | 1292   | 1970.5 | 1393.1 | 2954.7 | 1925.9 | 1183.9 | 2237.7 | 2094.6 | 3207.8 | 1475.6 | 2760.6 | 961.71 |
| (5-L-Glutamyl)-L-amino a | Amino acid and its d | 16479  | 8365.8 | 6937.3 | 37573  | 9995   | 6336.1 | 5103.1 | 10368  | 7637   | 5230.1 | 9399.5 | 6743   |
| L-Tyrosine               | amino acids          | 504655 | 537855 | 450472 | 378885 | 323340 | 4512   | 2947.1 | 136594 | 87473  | 173180 | 85005  | 2155.3 |
| 3-Methy-L-histidine      | amino acids          | 163275 | 90804  | 113492 | 66970  | 35116  | 33585  | 50295  | 83041  | 54380  | 66111  | 72807  | 64010  |
| beta-Alanine             | amino acids          | 93994  | 115942 | 93355  | 78442  | 42233  | 51909  | 119644 | 44320  | 42376  | 58946  | 29077  | 88368  |
| 1-Methy-L-histidine      | amino acids          | 44742  | 24095  | 35187  | 46091  | 10945  | 16629  | 12365  | 20600  | 27928  | 12774  | 20361  | 22817  |
| 4-Aminobutyric acid      | amino acids          | 22065  | 0      | 19275  | 29074  | 17864  | 19480  | 124389 | 95061  | 65868  | 55773  | 159609 | 135793 |
| 5-Hydroxylysine          | amino acids          | 3378.6 | 3522.6 | 6532.4 | 3319.2 | 3698.3 | 4302.1 | 1867.3 | 5000.2 | 4540.3 | 3022.9 | 2740.7 | 2467.3 |
| Questinol                | Anthraquinones       | 22022  | 15317  | 10531  | 26572  | 16338  | 11858  | 19822  | 25878  | 19183  | 24047  | 8352.8 | 28333  |
| Aurantio-obtusin         | Anthraquinones       | 21527  | 16899  | 8453.6 | 12920  | 19435  | 22083  | 11491  | 10768  | 13498  | 20361  | 12382  | 15323  |
| Aloeemodin               | Anthraquinones       | 2859.8 | 3388.8 | 1617   | 15320  | 6488.3 | 25977  | 1524.6 | 4720.8 | 7899.9 | 1534   | 5585.2 | 2231.9 |
| Lucidin                  | Anthraquinones       | 2231.6 | 3388.8 | 1679.9 | 15320  | 6488.3 | 25977  | 1524.6 | 4304.1 | 3213.1 | 1137   | 5585.2 | 2125.9 |
| Anthraquinone            | Anthraquinones       | 5475   | 3801.5 | 3400.2 | 7544.1 | 4186.8 | 1685.4 | 5488.1 | 8738.3 | 5405.9 | 6897.6 | 6367.9 | 6430.3 |

|                            |                      |        |        |        |        |        |        |        |        |        |        |        |        |
|----------------------------|----------------------|--------|--------|--------|--------|--------|--------|--------|--------|--------|--------|--------|--------|
| Chrysophanol               | Anthraquinones       | 1783.8 | 2893.9 | 2179.7 | 2931.1 | 3644   | 5774.2 | 1778.7 | 5292.4 | 1770.7 | 3143   | 3028.9 | 1320.2 |
| Citreorosein               | Anthraquinones       | 898.87 | 2949.5 | 2691.4 | 4584.1 | 1975.2 | 1292.7 | 2744.2 | 1532.2 | 915.09 | 1639.7 | 1509.6 | 2718.5 |
| Alizarin 2-methyl ether    | Anthraquinones       | 2220.7 | 2130.7 | 3566.6 | 1845   | 1924.9 | 1387.4 | 2147.6 | 971.72 | 929.09 | 452.25 | 1174.7 | 2760.2 |
| Glucofrangulin B           | Anthraquinones       | 509.5  | 2867.6 | 0      | 0      | 0      | 3781.9 | 0      | 0      | 1008.7 | 8540.1 | 0      | 8326.1 |
| Urocanic acid              | Azoles               | 80626  | 2E+06  | 3E+06  | 3E+06  | 2E+06  | 3E+06  | 25557  | 8547.6 | 37442  | 21160  | 36045  | 27795  |
| Tricyclazole               | Azoles               | 15253  | 9612.5 | 13985  | 18561  | 26794  | 9379.3 | 14020  | 24557  | 17869  | 4560.2 | 12203  | 11052  |
| Benzocaine                 | Benzene and substit  | 3E+07  | 9E+07  | 5E+07  | 1E+08  | 1E+07  | 930611 | 6726.6 | 1E+06  | 5136.4 | 7211.5 | 17106  | 8050.1 |
| 4-Methylbenzaldehyde       | Benzene and substit  | 994971 | 1E+06  | 5E+06  | 1E+06  | 3E+06  | 1E+06  | 1E+06  | 2E+06  | 3E+06  | 968879 | 1E+06  | 2E+06  |
| Enol-phenylpyruvate        | Benzene and substit  | 517818 | 553544 | 509746 | 340015 | 523599 | 1E+06  | 16895  | 31398  | 23389  | 23486  | 27090  | 35561  |
| Phenethylamine             | Benzene and substit  | 126177 | 293365 | 168315 | 451738 | 26945  | 9857.3 | 5916.6 | 10766  | 3984.3 | 12242  | 6242.2 | 5174.1 |
| 2-(Methylamino)benzoic a   | Benzene and substit  | 4888   | 50109  | 55500  | 82022  | 62777  | 87468  | 20173  | 5164.4 | 22995  | 35146  | 9679.1 | 9632.9 |
| Formylanthranilic acid     | Benzene and substit  | 16743  | 27618  | 42634  | 13609  | 25880  | 92140  | 4908.1 | 12556  | 11101  | 20665  | 9987.6 | 10339  |
| Ephedrine                  | Benzene and substit  | 6036.1 | 25833  | 23167  | 10521  | 20116  | 29845  | 3172.5 | 10651  | 5792.5 | 2222.4 | 4355   | 8513.5 |
| 4-Hydroxyphenylacetalde    | Benzene and substit  | 7099.6 | 17907  | 12637  | 19494  | 13098  | 10344  | 8753.2 | 9703.3 | 12687  | 10177  | 33273  | 10912  |
| 2-Phenylacetamide          | Benzene and substit  | 11654  | 14659  | 11474  | 23817  | 7305.8 | 4722.3 | 379321 | 11807  | 665945 | 329269 | 900408 | 8727   |
| 2-Hydroxy-3-(4-hydroxyl    | Benzene and substit  | 11403  | 7040.5 | 9376.8 | 7536   | 7605.7 | 7643.5 | 8325.2 | 12564  | 6367.2 | 7665.1 | 16934  | 11937  |
| Xylometazoline             | Benzene and substit  | 9445.9 | 10506  | 6317   | 4004.9 | 5332.6 | 7129.2 | 3697.3 | 5899.3 | 8683.5 | 5496.4 | 9042.6 | 3357.3 |
| 5-Phenyl-1,3-oxazinane-2,  | Benzene and substit  | 4936.4 | 8375.5 | 10498  | 5095.1 | 1029.9 | 2094.5 | 1067.7 | 3170.6 | 3302.4 | 1720   | 334.15 | 1415.4 |
| N-Acetylarylamine          | Benzene and substit  | 859.74 | 5161.3 | 5541.9 | 4137.7 | 0      | 0      | 0      | 25557  | 0      | 16832  | 24987  | 0      |
| N1-(alpha-D-ribosyl)-5,6-( | Benzimidazole ribon  | 12102  | 9033.3 | 8001.5 | 6167.4 | 6679.9 | 7046.3 | 87355  | 112571 | 74249  | 40280  | 89438  | 29291  |
| Dimethylbenzimidazole      | Benzimidazoles       | 10210  | 10578  | 6482.4 | 11797  | 8416.8 | 7833.6 | 10568  | 15669  | 4120.1 | 11239  | 15828  | 17546  |
| Carbendazim                | Benzimidazoles       | 3068.2 | 694.7  | 1865.2 | 1146.4 | 1642.7 | 908.95 | 3732.8 | 1834.2 | 2815.9 | 3517.4 | 2690.8 | 1365.3 |
| Safrole                    | Benzodioxoles        | 125045 | 36745  | 70051  | 107300 | 147254 | 66690  | 143143 | 134445 | 137349 | 47430  | 136982 | 76579  |
| p-Aminobenzoate            | Benzoic acid derivat | 2E+06  | 1E+06  | 2E+06  | 3E+06  | 740887 | 677018 | 2E+06  | 1E+06  | 2E+06  | 2E+06  | 1E+06  | 1E+06  |
| 6-Methoxymellein           | Benzopyrans          | 2714   | 8920   | 2322.1 | 3031.6 | 1714.9 | 1038.5 | 3551.6 | 6601   | 2258.3 | 2801   | 2117.6 | 3947.1 |
| 2(3H)-Benzothiazolethion   | Benzothiazoles       | 5378.8 | 3926.1 | 5000.4 | 1645.1 | 3596.9 | 2020.6 | 5215.1 | 11114  | 3725.4 | 10172  | 4349.4 | 7337.6 |
| (R)-2-Hydroxy-2H-1,4-ber   | Benzoxazines         | 8793.7 | 16173  | 11462  | 18522  | 17346  | 11077  | 13400  | 15440  | 13353  | 16858  | 9915   | 12361  |
| Sucrose                    | Carbohydrates        | 1E+07  | 1E+07  | 1E+07  | 4E+06  | 2E+07  | 9E+06  | 7E+06  | 7E+06  | 5E+06  | 1E+07  | 6E+06  | 1E+07  |
| D-Maltose                  | Carbohydrates        | 1E+07  | 9E+06  | 8E+06  | 1E+07  | 1E+07  | 5E+06  | 1E+07  | 8E+06  | 8E+06  | 7E+06  | 9E+06  | 1E+07  |
| D-Glucose 6-phosphate      | Carbohydrates        | 873896 | 1E+06  | 2E+06  | 1E+06  | 1E+06  | 1E+06  | 289162 | 269012 | 278083 | 477754 | 288763 | 458990 |
| Gluconic acid              | Carbohydrates        | 350051 | 697979 | 480331 | 1E+06  | 358958 | 406562 | 306385 | 661283 | 311217 | 982933 | 286550 | 343016 |
| alpha-D-Glucose            | Carbohydrates        | 181913 | 96424  | 107530 | 171775 | 167181 | 99451  | 179758 | 50047  | 105358 | 126256 | 125247 | 188720 |

|                                     |                                    |        |        |        |        |        |        |        |        |        |        |        |        |
|-------------------------------------|------------------------------------|--------|--------|--------|--------|--------|--------|--------|--------|--------|--------|--------|--------|
| D-glucuronic acid                   | Carbohydrates                      | 74241  | 132842 | 76664  | 88200  | 52967  | 65073  | 86158  | 100941 | 81922  | 76920  | 53813  | 94529  |
| beta-Lactose                        | Carbohydrates                      | 5507.9 | 204366 | 5205.6 | 201762 | 12070  | 11442  | 2923.6 | 3906.8 | 4209.9 | 939.95 | 841.84 | 989.89 |
| Maltotetraose                       | Carbohydrates                      | 29162  | 23943  | 16330  | 54121  | 31290  | 28769  | 12099  | 10032  | 0      | 13089  | 6393.9 | 4248.3 |
| D-Ribose                            | Carbohydrates                      | 20397  | 30914  | 27152  | 32529  | 6700.6 | 7925.4 | 24700  | 17081  | 11043  | 10792  | 11302  | 21192  |
| Gluconolactone                      | Carbohydrates                      | 23095  | 16459  | 15095  | 28548  | 9606.2 | 4511.3 | 17464  | 15534  | 6410.4 | 14067  | 12374  | 13567  |
| 2-Deoxyribose 5'-phosphate          | Carbohydrates                      | 14828  | 9366.5 | 23421  | 11290  | 13218  | 12309  | 7813.4 | 36671  | 22901  | 21192  | 7314.6 | 9865.4 |
| D-Xylulose                          | Carbohydrates                      | 13071  | 13373  | 9635.4 | 15620  | 9450.3 | 4609.3 | 10773  | 11721  | 6040.8 | 9901.5 | 6486   | 9899.3 |
| L-Gulose                            | Carbohydrates                      | 6554.6 | 3118.3 | 2466   | 6002   | 3013   | 5614   | 5195.5 | 11108  | 11233  | 3607.1 | 4980.1 | 5571.2 |
| Palmitoylethanolamide               | Carboximidic acids and derivatives | 54602  | 0      | 38240  | 57587  | 0      | 0      | 0      | 42737  | 42096  | 38914  | 52023  | 61960  |
| D-Proline                           | Carboxylic acids and derivatives   | 1E+07  | 1E+07  | 1E+07  | 1E+07  | 4E+06  | 2E+06  | 1E+06  | 5E+06  | 1E+06  | 4E+06  | 6E+06  | 3E+06  |
| D-alpha-Aminobutyric acid           | Carboxylic acids and derivatives   | 4E+06  | 1E+07  | 6E+06  | 5E+06  | 1E+07  | 7E+06  | 9E+06  | 1E+07  | 7E+06  | 1E+07  | 1E+07  | 1E+07  |
| D-Glutamine                         | Carboxylic acids and derivatives   | 1E+07  | 5E+06  | 4E+06  | 9E+06  | 3E+06  | 5E+06  | 2E+06  | 4E+06  | 1E+06  | 2E+06  | 5E+06  | 4E+06  |
| Pyrrolidonecarboxylic acid          | Carboxylic acids and derivatives   | 4E+06  | 3E+06  | 5E+06  | 4E+06  | 3E+06  | 3E+06  | 1E+06  | 3E+06  | 1E+06  | 2E+06  | 3E+06  | 3E+06  |
| Hydroxypropanedioic acid            | Carboxylic acids and derivatives   | 716244 | 1E+06  | 619855 | 2E+06  | 310419 | 242626 | 353267 | 139822 | 150421 | 62168  | 179116 | 257992 |
| Proline betaine                     | Carboxylic acids and derivatives   | 201226 | 335876 | 184862 | 53014  | 132301 | 78218  | 162235 | 286403 | 135554 | 143723 | 181494 | 124574 |
| NG,NG-Dimethylarginine              | Carboxylic acids and derivatives   | 109141 | 116258 | 86338  | 212974 | 80971  | 0      | 70246  | 173122 | 34198  | 97418  | 192473 | 57846  |
| (S)-2,3,4,5-tetrahydropyridine      | Carboxylic acids and derivatives   | 33722  | 28202  | 14323  | 38265  | 39457  | 35315  | 7405.7 | 5564.5 | 6453.9 | 10239  | 7138.3 | 5386.1 |
| 2-Aminomuconate semialdehyde        | Carboxylic acids and derivatives   | 18821  | 24030  | 16675  | 27599  | 6423.2 | 11060  | 6355.3 | 20721  | 25848  | 23257  | 16059  | 23069  |
| N-Acetyl-L-glutamate 5-semialdehyde | Carboxylic acids and derivatives   | 18626  | 17410  | 14226  | 13327  | 13206  | 27256  | 7103.2 | 7737.1 | 1241.9 | 5636.1 | 4550.4 | 3869.4 |
| Lincomycin                          | Carboxylic acids and derivatives   | 22686  | 3937.4 | 9172.7 | 8934   | 34149  | 6203   | 9427.2 | 6030   | 0      | 3561.2 | 13860  | 14468  |
| Beta-Tyrosine                       | Carboxylic acids and derivatives   | 4195.2 | 21733  | 4008.9 | 28790  | 3673.3 | 5528.9 | 3283.7 | 10589  | 2868.1 | 6398.6 | 5219.4 | 5356.1 |
| L-Hypoglycin A                      | Carboxylic acids and derivatives   | 6881.5 | 12812  | 1305.9 | 8818.6 | 6432.2 | 11978  | 10437  | 19214  | 13673  | 23454  | 8478.2 | 15972  |
| Ergothioneine                       | Carboxylic acids and derivatives   | 6028.9 | 8543.4 | 8899.7 | 6571.5 | 4561.3 | 6062.3 | 9007   | 16385  | 6610   | 13308  | 8122.3 | 9994.1 |
| Clavulanate                         | Carboxylic acids and derivatives   | 7538.8 | 7352.5 | 4111.6 | 7069.8 | 4769.9 | 3382.2 | 5544.8 | 5822.6 | 4963.6 | 7791.9 | 2986.9 | 4614   |
| Maleic acid                         | Carboxylic acids and derivatives   | 8427.7 | 6220.3 | 2907.5 | 5540.4 | 7076.5 | 2947.9 | 5978.9 | 9038.3 | 4466.3 | 4095.9 | 9710.7 | 8540.7 |
| Asp-Phe methyl ester                | Carboxylic acids and derivatives   | 3319.7 | 3763   | 8691.8 | 7087   | 2221.4 | 2517.7 | 42119  | 97479  | 60580  | 83497  | 93970  | 41777  |
| Isocitrate                          | Carboxylic acids and derivatives   | 1918.1 | 5982.5 | 6172   | 2795.9 | 3133.4 | 6164.4 | 1934.2 | 2177.6 | 3703.3 | 8368.3 | 5158.7 | 6411.5 |
| p-Hydroxyphenylacetylglutamate      | Carboxylic acids and derivatives   | 4371.9 | 6032   | 5316.3 | 1399.5 | 5982.7 | 2528.4 | 6538.8 | 3561.5 | 5231.2 | 5815.7 | 4411.6 | 10352  |
| cis-2-Methylnaconitate              | Carboxylic acids and derivatives   | 2647.5 | 4680.1 | 3717.2 | 4063.4 | 5412.6 | 4747   | 4409.4 | 3354.6 | 6364.5 | 3835.7 | 2610.2 | 3986.1 |
| Tricholomic acid                    | Carboxylic acids and derivatives   | 2049.6 | 5706.2 | 2227   | 3425.9 | 3027.9 | 4114   | 5662   | 3827.9 | 2761.2 | 4729.8 | 3359.3 | 2639   |
| N-Acetyl-L-histidine                | Carboxylic acids and derivatives   | 5359.2 | 2511.5 | 1099   | 2796.9 | 1670.2 | 0      | 2842.3 | 10783  | 4189.9 | 4809.8 | 0      | 4026.1 |
| S-Lactoylglutathione                | Carboxylic acids and derivatives   | 1310.9 | 2260.1 | 2265.7 | 1657.7 | 1606.8 | 4006.6 | 1346.1 | 1137.3 | 989.04 | 221.71 | 0      | 230.56 |

|                                                 |                      |        |        |        |        |        |        |        |        |        |        |        |        |
|-------------------------------------------------|----------------------|--------|--------|--------|--------|--------|--------|--------|--------|--------|--------|--------|--------|
| L-Targinine                                     | Carboxylic acids and | 2413.5 | 743.92 | 271.88 | 2248.2 | 1798.2 | 1538.9 | 3195.9 | 2459.8 | 2475.8 | 1238.9 | 1320.4 | 1624.4 |
| Okanin                                          | Chalcones            | 4E+06  | 4E+06  | 4E+06  | 3E+06  | 4E+06  | 4E+06  | 16724  | 22333  | 19222  | 11960  | 12558  | 17039  |
| Hydroxysafflor yellow A                         | Chalcones            | 257489 | 16166  | 210063 | 280519 | 8762.5 | 290213 | 237753 | 286626 | 484698 | 15957  | 16144  | 214964 |
| Asebogenin                                      | Chalcones            | 18983  | 28832  | 27268  | 13458  | 20838  | 22565  | 7187   | 7464.8 | 6169.2 | 4938.4 | 5311   | 7371.5 |
| Phlorizin                                       | Chalcones            | 23875  | 8332.1 | 42972  | 10370  | 13113  | 12015  | 0      | 0      | 0      | 555.61 | 0      | 0      |
| Safflor Yellow A                                | Chalcones            | 11539  | 2143.5 | 3480.7 | 2165.5 | 4970.9 | 3455.1 | 2239.5 | 15279  | 9486.9 | 0      | 4081.6 | 15789  |
| Butein                                          | Chalcones            | 5599.5 | 2093.7 | 4610   | 1150.5 | 8678.3 | 3332.7 | 1895   | 3327.8 | 2779.5 | 4414.8 | 4636.8 | 3883.4 |
| 2',6'-Dihydroxy 4'-methoxy                      | Chalcones            | 5397.8 | 5408   | 4089.7 | 3396.6 | 3909.1 | 2355.2 | 3622   | 9954.7 | 14430  | 8293.6 | 19137  | 5186.7 |
| Neosperidin dihydrochalcone                     | Chalcones            | 0      | 0      | 0      | 0      | 0      | 0      | 0      | 10164  | 37912  | 0      | 0      | 2606   |
| Phosphorylcholine                               | Cholines             | 866139 | 464183 | 644183 | 509231 | 646946 | 2E+06  | 337002 | 187513 | 222135 | 434079 | 209778 | 322326 |
| O-Phosphocholine                                | Cholines             | 1736.2 | 1557.6 | 2409.9 | 11025  | 6778.1 | 2957.2 | 3617.6 | 9650.6 | 5425.5 | 7830.2 | 3976.8 | 5047.7 |
| Glycerophosphocholine                           | Cholines             | 3256.6 | 6545.1 | 4311   | 0      | 0      | 0      | 0      | 9246.9 | 1340.5 | 5116.6 | 0      | 4291   |
| Ethyl trans-p-methoxycinnamate                  | Cinnamic acids and   | 88436  | 50133  | 61875  | 34482  | 97985  | 89049  | 26040  | 53658  | 88238  | 25919  | 53016  | 38999  |
| 3-(3,4-Dihydroxy-5-methoxyphenyl)propanoic acid | Cinnamic acids and   | 6721   | 16560  | 4493.7 | 3509.2 | 5619.1 | 3073.9 | 5277.2 | 4068   | 6705.4 | 3849.4 | 5426.8 | 2990.6 |
| Carbofuran                                      | Coumarans            | 6740.7 | 9602.8 | 8729.2 | 7353   | 4078.6 | 5210.2 | 1360.9 | 3392.4 | 1038.1 | 1842.6 | 1916.8 | 1943.3 |
| 8-Geranyloxypsoralen                            | Coumarins            | 1E+06  | 717131 | 604796 | 639672 | 618169 | 469215 | 700449 | 599957 | 374489 | 45472  | 144422 | 489376 |
| Micromelin                                      | Coumarins            | 46003  | 41704  | 79294  | 196968 | 22665  | 79919  | 1271.3 | 3753.2 | 642.02 | 0      | 634.03 | 7102   |
| Psoralidin                                      | Coumarins            | 40801  | 16367  | 22762  | 18931  | 31767  | 38648  | 80064  | 119872 | 43984  | 55740  | 37167  | 56901  |
| Scoparone                                       | Coumarins            | 12120  | 14941  | 29873  | 10726  | 15253  | 20629  | 23827  | 27035  | 15712  | 20296  | 14374  | 9438.9 |
| Lansiumarin A                                   | Coumarins            | 15054  | 3570.2 | 2405.7 | 16084  | 15014  | 43352  | 11645  | 21182  | 6918.8 | 21993  | 12538  | 25660  |
| Alloimperatorin                                 | Coumarins            | 14854  | 14469  | 32216  | 11055  | 15762  | 7035.3 | 8714.5 | 7513.5 | 11093  | 7379.5 | 16148  | 9094.4 |
| Luvangetin                                      | Coumarins            | 17304  | 16893  | 11507  | 14193  | 5928   | 18476  | 3334.6 | 2718.6 | 2051.3 | 1812.4 | 2880.3 | 1571.7 |
| 8-Hydroxybergapten                              | Coumarins            | 33673  | 7764.6 | 1193.3 | 1838.5 | 19654  | 4663.2 | 610.89 | 8346.4 | 14261  | 14878  | 12500  | 1798   |
| Bergamotone                                     | Coumarins            | 10345  | 5591.6 | 2901.7 | 20353  | 5799   | 11273  | 22849  | 6737.6 | 3053.9 | 6427.1 | 10881  | 10870  |
| Daphnoretin                                     | Coumarins            | 12112  | 7011.4 | 4572.3 | 12963  | 684.15 | 18602  | 11734  | 24025  | 14992  | 2144.5 | 20354  | 4198   |
| Herniarin                                       | Coumarins            | 6556.6 | 3828.4 | 7657.5 | 7633.2 | 9428.9 | 13933  | 16405  | 18693  | 4735.1 | 17250  | 28071  | 6128.3 |
| Fraxetin                                        | Coumarins            | 4631.9 | 4128.2 | 5914.9 | 5249.3 | 12084  | 10158  | 10661  | 1612.8 | 4716   | 9303.9 | 6317.8 | 2897.2 |
| 4-Methylumbelliferyl acetate                    | Coumarins            | 10467  | 6179.3 | 3775.7 | 9264.8 | 3888.9 | 4486.1 | 5313.9 | 8388.4 | 5156.9 | 8511.4 | 9600.4 | 15983  |
| Neoglycyrol                                     | Coumarins            | 4772.9 | 1143.1 | 8628.8 | 2288.8 | 19283  | 1855.9 | 3379.1 | 10172  | 7532.6 | 3596.5 | 12376  | 15204  |
| Decursin                                        | Coumarins            | 8842.3 | 3690.4 | 2924.1 | 5872.3 | 8224.2 | 2944.6 | 6082.5 | 10018  | 2809.9 | 6161.1 | 17258  | 1702.3 |
| Notopterol                                      | Coumarins            | 10930  | 0      | 6151.9 | 2359   | 1565.1 | 5808.3 | 4369.1 | 13779  | 6116.8 | 3478.9 | 8198.5 | 5807.5 |
| 4-Methylumbelliferone                           | Coumarins            | 2806.1 | 6912.9 | 3489.9 | 4905.7 | 4454   | 3352   | 3655.1 | 10701  | 5989.4 | 4734.9 | 1765.8 | 3426.1 |



|                       |                      |        |        |        |        |        |        |        |        |        |        |        |        |
|-----------------------|----------------------|--------|--------|--------|--------|--------|--------|--------|--------|--------|--------|--------|--------|
| Mellein               | Coumarins            | 2252.7 | 4910.9 | 2229.9 | 4914.7 | 2610.9 | 6411.5 | 8775.5 | 4377.8 | 4529.8 | 5198.7 | 3288.9 | 3605.1 |
| Esculin               | Coumarins            | 3128.5 | 4016.9 | 3400.1 | 5114   | 2506   | 4499.3 | 2317.7 | 8401   | 4524.8 | 6575.5 | 12360  | 363.33 |
| Bergapten             | Coumarins            | 1940   | 1921.7 | 5964   | 5123.7 | 4775.3 | 2911.4 | 4259   | 8670   | 1362   | 693.47 | 5535.3 | 6452.6 |
| Dalbergin             | Coumarins            | 736.83 | 1339   | 3628.8 | 3985.7 | 9821   | 1324.2 | 2209.3 | 2637.6 | 520.77 | 2305.2 | 4028.9 | 2081.4 |
| Isobergapten          | Coumarins            | 2408.1 | 3173.7 | 3386.6 | 2302   | 2431.2 | 4227.8 | 5674   | 2530.6 | 1783.7 | 1481.2 | 1500.7 | 3087.7 |
| Nodakenin             | Coumarins            | 1297.3 | 6034.5 | 3548.7 | 1388.4 | 1428   | 710.62 | 4617   | 4571   | 10487  | 2284   | 3649.6 | 1544.9 |
| Bergaptol             | Coumarins            | 2069.9 | 1750.4 | 1976.8 | 1901.2 | 1526.4 | 3618.1 | 2785.9 | 3531.5 | 2993.3 | 6116.1 | 3134.8 | 2847.3 |
| Warfarin              | Coumarins and deriv  | 392.35 | 398.29 | 595.39 | 1159.1 | 401.32 | 847.5  | 3420.9 | 6759.6 | 2721.8 | 5381.8 | 2665.3 | 0      |
| Miltirone             | Diterpenoids         | 781511 | 590678 | 783016 | 2E+06  | 988052 | 949177 | 905493 | 1E+06  | 718095 | 578654 | 954398 | 732066 |
| Kirenol               | Diterpenoids         | 409532 | 220217 | 170483 | 350771 | 238069 | 182464 | 256377 | 217149 | 140871 | 17293  | 30808  | 186903 |
| Kaurenoic acid        | Diterpenoids         | 30157  | 47512  | 49420  | 39176  | 40610  | 51892  | 0      | 0      | 0      | 0      | 468.78 | 0      |
| Bruceine D            | Diterpenoids         | 5304.8 | 8356.2 | 16684  | 16252  | 10063  | 19290  | 0      | 0      | 1612.4 | 1609.9 | 1587.3 | 1036.3 |
| Sterebin A            | Diterpenoids         | 17370  | 6418.5 | 0      | 13880  | 8790.1 | 7447.8 | 263338 | 958065 | 403896 | 399382 | 773966 | 253714 |
| 6,7-Dehydroferruginol | Diterpenoids         | 5435.2 | 6172.5 | 10974  | 3735.1 | 5894.5 | 4171.1 | 6888.6 | 10097  | 10552  | 8955.7 | 10117  | 10369  |
| Abietic acid          | Diterpenoids         | 8048.8 | 2099.2 | 5380   | 3024.8 | 5169.8 | 6209.5 | 4296.1 | 3082.3 | 2428.4 | 2346.7 | 0      | 10281  |
| Diosbulbin D          | Diterpenoids         | 5513.9 | 684.48 | 2794.7 | 6444.1 | 4016.2 | 1358.9 | 3088.7 | 1063   | 1749.7 | 5581.9 | 1040.1 | 4236.2 |
| Picrasin B            | Diterpenoids         | 387.22 | 4107.8 | 1691.1 | 3429.6 | 3959.5 | 2737.4 | 1343.6 | 573.93 | 312.2  | 1117.4 | 1156.5 | 2576.4 |
| Triptdiolide          | Diterpenoids         | 3173   | 2300.8 | 1165   | 4888.4 | 3751   | 611.89 | 580.74 | 1372.6 | 594.74 | 2628.7 | 4105   | 1176.1 |
| (+)-Glaucarubinone    | Diterpenoids         | 2361.2 | 1291.1 | 0      | 2835.4 | 1930.2 | 5745.3 | 0      | 4223.1 | 934.73 | 3858.3 | 0      | 0      |
| Mevastatin            | Diterpenoids         | 4109.9 | 0      | 0      | 3924.4 | 2312   | 2252   | 15640  | 8649.1 | 0      | 0      | 6439.2 | 1414.1 |
| Bromocriptine         | Ergoline and derivat | 7006.2 | 1517.1 | 46015  | 98491  | 139129 | 5578.9 | 81080  | 89673  | 3156.5 | 6219.4 | 15075  | 31639  |
| Turanose              | Fatty Acyls          | 1E+07  | 1E+07  | 6E+06  | 1E+07  | 1E+07  | 9E+06  | 7E+06  | 7E+06  | 1E+07  | 1E+07  | 6E+06  | 7E+06  |
| Lubiprostone          | Fatty Acyls          | 4E+06  | 3E+06  | 3E+06  | 4E+06  | 3E+06  | 2E+06  | 5E+06  | 4E+06  | 2E+06  | 2E+06  | 3E+06  | 3E+06  |
| Oleamide              | Fatty Acyls          | 3E+06  | 2E+06  | 14226  | 7E+06  | 6E+06  | 15067  | 3E+06  | 33980  | 5E+06  | 18547  | 35129  | 31613  |
| Kojibiose             | Fatty Acyls          | 2E+06  | 2E+06  | 2E+06  | 2E+06  | 3E+06  | 1E+06  | 802576 | 478709 | 881221 | 2E+06  | 2E+06  | 2E+06  |
| Erucic acid           | Fatty Acyls          | 1E+06  | 835754 | 663545 | 783990 | 885107 | 786204 | 1E+06  | 988323 | 427342 | 50101  | 146137 | 689298 |
| L(-)-Malic acid       | Fatty Acyls          | 1E+06  | 867319 | 491683 | 680570 | 426138 | 113180 | 656148 | 739382 | 702381 | 374039 | 1E+06  | 1E+06  |
| 8,9-DiHETrE           | Fatty Acyls          | 1E+06  | 654441 | 597130 | 88847  | 48396  | 70878  | 943421 | 198219 | 46665  | 37127  | 85268  | 84563  |
| Oleic acid            | Fatty Acyls          | 612275 | 155331 | 170034 | 554254 | 544952 | 404795 | 667350 | 1E+06  | 385629 | 267555 | 468146 | 337449 |
| Itaconic acid         | Fatty Acyls          | 277374 | 4518.8 | 289881 | 331615 | 161534 | 321506 | 119203 | 4957.4 | 110131 | 134651 | 294185 | 235020 |
| 6-Aminocaproic acid   | Fatty Acyls          | 112488 | 178400 | 90945  | 122521 | 77062  | 25048  | 25273  | 60975  | 42102  | 30823  | 40496  | 26357  |
| Octadecanamide        | Fatty Acyls          | 35465  | 21980  | 29887  | 74532  | 38363  | 49701  | 48987  | 57799  | 36554  | 20315  | 58268  | 36274  |

|                                                         |             |        |        |        |        |        |        |        |        |        |        |        |        |
|---------------------------------------------------------|-------------|--------|--------|--------|--------|--------|--------|--------|--------|--------|--------|--------|--------|
| Pimelic acid                                            | Fatty Acyls | 39548  | 47900  | 35869  | 52337  | 31743  | 38751  | 83956  | 104151 | 106017 | 115130 | 95110  | 116234 |
| Methyl hexadecanoic acid                                | Fatty Acyls | 13827  | 16316  | 18444  | 30723  | 60915  | 35580  | 22200  | 22282  | 19610  | 24047  | 14055  | 42104  |
| 20-HETE                                                 | Fatty Acyls | 28019  | 30565  | 15683  | 26505  | 29161  | 23864  | 19042  | 17560  | 13229  | 2980.3 | 4298.5 | 18336  |
| L-2-Hydroxyglutaric acid                                | Fatty Acyls | 5629.5 | 34205  | 19084  | 8886.1 | 16879  | 46000  | 4409.2 | 12652  | 35564  | 29235  | 13872  | 32900  |
| L-Acetylcarnitine                                       | Fatty Acyls | 34584  | 20624  | 15821  | 8884.2 | 20126  | 12154  | 20279  | 11736  | 7422.7 | 39531  | 18177  | 27631  |
| Colneleate                                              | Fatty Acyls | 21639  | 12867  | 14726  | 12072  | 19943  | 11454  | 127011 | 248326 | 68343  | 89908  | 134960 | 42152  |
| Stearic Acid                                            | Fatty Acyls | 15838  | 13611  | 3826   | 17725  | 16059  | 9904.1 | 12470  | 15450  | 7546.4 | 6618.1 | 11729  | 10599  |
| 9,10-DHOME                                              | Fatty Acyls | 14442  | 13685  | 9167.5 | 17283  | 14342  | 3128.2 | 15245  | 4196   | 8806.6 | 5400.2 | 11836  | 6655.6 |
| (10E,12Z)-(9S)-9-Hydroperoxy-10,12-octadecadienoic acid | Fatty Acyls | 5478.2 | 4544.4 | 14288  | 14708  | 13754  | 16362  | 111343 | 242736 | 81203  | 269697 | 159489 | 77045  |
| 3-Isopropylmalate                                       | Fatty Acyls | 5512.1 | 8174.3 | 3673   | 7073.8 | 9103.4 | 6214.5 | 12372  | 9898.9 | 14697  | 18501  | 12227  | 5839.2 |
| 13(S)-HPOT                                              | Fatty acyls | 5552.8 | 2730   | 7932   | 13156  | 4882.5 | 3968.8 | 7924.4 | 17152  | 8525.1 | 9105   | 22651  | 15213  |
| Methyl jasmonate                                        | Fatty Acyls | 7098.8 | 7080.8 | 6596.2 | 1900   | 10617  | 2486.3 | 4706.9 | 6351.4 | 9325.8 | 10039  | 9035.8 | 0      |
| Traumatic acid                                          | Fatty Acyls | 5657.8 | 8828.9 | 4586.6 | 5720.3 | 5172.8 | 3738.7 | 3693.4 | 6470.2 | 3662   | 5508.7 | 5219.6 | 8214.4 |
| 12(13)-EpOME                                            | Fatty Acyls | 6256.8 | 1545.1 | 6972.3 | 4627.7 | 7048   | 2741.5 | 2405.7 | 11884  | 12995  | 6226.1 | 6351.1 | 4618.6 |
| 9-OxoODE                                                | Fatty Acyls | 0      | 4549   | 12168  | 8316.6 | 0      | 3122.6 | 61341  | 132786 | 52031  | 41185  | 170560 | 60367  |
| Jasmonic acid                                           | Fatty Acyls | 2996.1 | 5903.9 | 8418   | 2969.3 | 4017.7 | 1696   | 2494.1 | 5949.1 | 5441.6 | 7270.4 | 5823.7 | 8745.5 |
| 8-Methylnonenoate                                       | Fatty Acyls | 4040.9 | 3238   | 3546.4 | 2896.1 | 5544.1 | 1783.1 | 2109.9 | 3326.7 | 677.13 | 3966.5 | 2091.1 | 1711.9 |
| (13E)-11a-Hydroxy-9,15-cis-11-octadecadienoic acid      | Fatty Acyls | 5383.3 | 2730   | 2736   | 3485.7 | 1403   | 2702.7 | 4209.7 | 5519.4 | 2140   | 0      | 4209.8 | 1400   |
| 20-COOH-Leukotriene B4                                  | Fatty Acyls | 4037   | 2569.4 | 1016.3 | 1391.7 | 1336   | 0      | 2826.5 | 1380.4 | 2148   | 5775.4 | 9780.5 | 14850  |
| 5,6-DHET                                                | Fatty Acyls | 2764.3 | 2875.3 | 284.71 | 0      | 2738.2 | 716.34 | 1202.7 | 2364.9 | 11304  | 3629.5 | 4794.6 | 2202.6 |
| 9(S)-HPOT                                               | Fatty acyls | 835.69 | 645.96 | 521.25 | 1707.9 | 634.69 | 1075   | 2536.7 | 7440.5 | 3832.2 | 6697.9 | 4449.8 | 1677.4 |
| Prostaglandin I2                                        | Fatty Acyls | 1006   | 1101.4 | 0      | 0      | 221.94 | 683.1  | 0      | 0      | 3450.2 | 12613  | 9500.4 | 6282   |
| Xanthohumol                                             | Flavanone   | 1850.3 | 3021.7 | 1871.7 | 3571.1 | 1349.3 | 1667.8 | 1833.9 | 2320.4 | 1912.1 | 2620.3 | 1410.4 | 1292.7 |
| Cianidanol                                              | flavonoids  | 2E+08  | 2E+08  | 1E+08  | 1E+08  | 1E+08  | 2E+08  | 253258 | 643033 | 221971 | 551768 | 169720 | 247570 |
| Epicatechin                                             | Flavonoids  | 1E+07  | 1E+07  | 9E+06  | 8E+06  | 9E+06  | 3E+07  | 67361  | 318974 | 191245 | 116874 | 100556 | 171563 |
| Procyanidin B2                                          | flavonoids  | 8E+06  | 7E+06  | 7E+06  | 6E+06  | 7E+06  | 2E+07  | 53888  | 233926 | 62006  | 49716  | 42556  | 79011  |
| Procyanidin B1                                          | flavonoids  | 7E+06  | 7E+06  | 8E+06  | 1E+07  | 6E+06  | 1E+07  | 11423  | 51033  | 7353.7 | 32377  | 8311.3 | 10697  |
| Narcissoside                                            | flavonoids  | 3E+06  | 2E+06  | 2E+06  | 3E+06  | 2E+06  | 4E+06  | 0      | 0      | 11222  | 17815  | 0      | 13282  |
| L-Epicatechin                                           | flavonoids  | 1E+06  | 1E+06  | 1E+06  | 770162 | 1E+06  | 3E+06  | 0      | 40772  | 15239  | 11430  | 17250  | 11293  |
| Rutin                                                   | flavonoids  | 567351 | 583445 | 357298 | 565559 | 473391 | 776282 | 0      | 0      | 0      | 3837.8 | 0      | 466.78 |
| Wighteone                                               | Flavonoids  | 1E+06  | 717131 | 604796 | 14031  | 618169 | 3975.4 | 700449 | 41953  | 12666  | 14762  | 143709 | 28123  |
| Cyanidin 3-rutinoside                                   | Flavonoids  | 258745 | 430506 | 436315 | 451839 | 491356 | 964922 | 2883.7 | 14096  | 2918.6 | 8683.5 | 367998 | 109615 |

|                           |            |        |        |        |        |        |        |        |        |        |        |        |        |
|---------------------------|------------|--------|--------|--------|--------|--------|--------|--------|--------|--------|--------|--------|--------|
| Maltol                    | Flavonoids | 194639 | 378050 | 632851 | 214228 | 271636 | 297104 | 528614 | 148518 | 247553 | 272723 | 263565 | 100205 |
| Vestitol                  | Flavonoids | 210084 | 81083  | 298651 | 178857 | 428322 | 265446 | 7680.1 | 6088.3 | 2198.1 | 1342.3 | 4092.6 | 1736   |
| Cynaroside                | flavonoids | 108572 | 187970 | 140644 | 201597 | 269260 | 326016 | 2E+06  | 423756 | 3E+06  | 498547 | 1E+07  | 5E+06  |
| Peonidin-3-glucoside      | Flavonoids | 112287 | 149989 | 171088 | 113625 | 116872 | 371679 | 3E+06  | 1E+06  | 3E+06  | 846042 | 1E+07  | 5E+06  |
| Kaempferol-3-O-rutinosid  | flavonoids | 65550  | 67547  | 114588 | 210520 | 192998 | 261972 | 5386.5 | 2312.8 | 2756.2 | 6801.3 | 5387.1 | 4525.1 |
| Taxifolin                 | flavonoids | 149596 | 67431  | 105333 | 164583 | 147888 | 208871 | 53469  | 34746  | 33219  | 41285  | 38882  | 31870  |
| Dalbergioidin             | Flavonoids | 93670  | 74214  | 66764  | 73251  | 289570 | 229625 | 33540  | 46359  | 53285  | 189839 | 182235 | 104433 |
| Karanjin                  | Flavonoids | 266814 | 47769  | 84079  | 93867  | 84273  | 160599 | 65035  | 322795 | 198565 | 376151 | 190393 | 159060 |
| Eriodictyol               | flavonoids | 59578  | 37079  | 56245  | 86280  | 111729 | 170553 | 14939  | 17336  | 22871  | 8058.2 | 62903  | 23331  |
| Rhoifolin                 | flavonoids | 23778  | 114516 | 40563  | 82275  | 107115 | 152029 | 22214  | 12154  | 6983   | 13024  | 54290  | 23584  |
| Chalconaringenin          | flavonoids | 46884  | 43408  | 48915  | 86791  | 68469  | 113565 | 6641.6 | 7865.9 | 5838.5 | 7259   | 8501   | 7040.7 |
| Glycinol                  | Flavonoids | 81794  | 34725  | 33385  | 87664  | 47673  | 119415 | 7059.3 | 3606.1 | 4164.8 | 2998.8 | 3546.2 | 8257.9 |
| Catechin                  | Flavonoids | 76884  | 66200  | 36338  | 36478  | 44451  | 105550 | 2241.8 | 4432.9 | 515.32 | 2158.8 | 0      | 558.27 |
| Delphinidin-3-O-glucoside | Flavonoids | 68372  | 41474  | 77265  | 64068  | 56986  | 51479  | 1762.8 | 3366.6 | 1223   | 3473.3 | 2585.6 | 4646.2 |
| Genistin                  | flavonoids | 53135  | 111222 | 8712.5 | 56521  | 92446  | 30519  | 187827 | 25386  | 92122  | 5249   | 326144 | 215728 |
| Naringenin                | flavonoids | 53686  | 54422  | 36842  | 86791  | 25409  | 83462  | 9071.7 | 3278.2 | 5236.9 | 7070.9 | 3355.1 | 3804.8 |
| Tricetin                  | Flavonoids | 18100  | 55633  | 65490  | 3828.3 | 7344.7 | 97589  | 0      | 791.7  | 788.9  | 600.54 | 689.01 | 582.58 |
| Naringenin chalcone       | Flavonoids | 37721  | 18520  | 84015  | 26902  | 47864  | 31151  | 5924.3 | 14370  | 10145  | 26648  | 10895  | 8236.9 |
| Blumeatin                 | Flavonoids | 33790  | 25811  | 34554  | 34255  | 20109  | 61678  | 629.54 | 4991.3 | 2968.8 | 1170.3 | 1169.9 | 1217.6 |
| Malvidin-3-O-galactoside  | Flavonoids | 6883.7 | 68215  | 39471  | 25691  | 29573  | 22214  | 949.65 | 2741.4 | 467.7  | 1218.9 | 478.04 | 233.55 |
| Kazinol A                 | Flavonoids | 38933  | 28275  | 21930  | 39376  | 34201  | 28197  | 36933  | 35353  | 13129  | 5985.7 | 11194  | 20924  |
| Dihydromyricetin          | flavonoids | 25800  | 21545  | 36145  | 31878  | 20669  | 44167  | 5117.4 | 581.97 | 2868.3 | 1143.6 | 41436  | 3350.9 |
| Morusin                   | Flavonoids | 22686  | 25881  | 18726  | 82828  | 9443.5 | 14070  | 7990.8 | 70918  | 15841  | 17379  | 7545.4 | 21590  |
| Brazilin                  | Flavonoids | 19319  | 11752  | 20940  | 19008  | 23594  | 53876  | 4601   | 3545   | 1867.2 | 4512.9 | 7028.9 | 9751.6 |
| Tricin                    | Flavonoids | 19146  | 17476  | 23003  | 27776  | 18595  | 27776  | 14173  | 18538  | 13441  | 25055  | 37363  | 26450  |
| Isoquercitrin             | Flavonoids | 11600  | 8196.6 | 5158   | 35201  | 8288.6 | 51479  | 2910.5 | 5240.6 | 5162   | 4485.8 | 2955.2 | 2746.5 |
| Diosmin                   | flavonoids | 0      | 42240  | 0      | 0      | 0      | 71807  | 21907  | 0      | 17054  | 34085  | 158075 | 89495  |
| Neoastilbin               | Flavonoids | 29172  | 9852.6 | 20054  | 13914  | 7663.8 | 24389  | 1266   | 1268.9 | 880.7  | 4008   | 3081   | 628.85 |
| Quercetagetin             | Flavonoids | 18340  | 20218  | 24531  | 0      | 17840  | 22728  | 11762  | 19786  | 21431  | 2808   | 0      | 28742  |
| Isorhamnetin              | flavonoids | 6015.2 | 9301.5 | 18245  | 0      | 12671  | 54688  | 0      | 1982.9 | 0      | 3394.8 | 815.7  | 1503.4 |
| Aromadendrin              | Flavonoids | 17901  | 8266   | 18061  | 20549  | 15321  | 11121  | 4582.7 | 14805  | 8711.8 | 7751.5 | 9627.1 | 4923.6 |
| Hydrangenol               | Flavonoids | 10815  | 5140.7 | 15907  | 11836  | 29105  | 12412  | 10634  | 15381  | 4304.5 | 15351  | 12348  | 10845  |

|                            |            |        |        |        |        |        |        |        |        |        |        |        |        |
|----------------------------|------------|--------|--------|--------|--------|--------|--------|--------|--------|--------|--------|--------|--------|
| Pelargonidin-3,5-O-digluc  | Flavonoids | 12485  | 20573  | 7486.2 | 13641  | 16619  | 8750.7 | 560100 | 735102 | 356218 | 442360 | 799663 | 571926 |
| 2',3,5,7-Tetrahydroxyflavo | Flavonoids | 12232  | 4102.8 | 10082  | 6395.9 | 27065  | 18998  | 1360.4 | 4097.1 | 4955.7 | 7764.7 | 2657.9 | 1924.7 |
| Tectorigenin               | flavonoids | 9892.2 | 4379.9 | 12357  | 7158.3 | 18640  | 26398  | 57989  | 108639 | 111936 | 92266  | 307148 | 165604 |
| Deguelin                   | Flavonoids | 17658  | 7789.3 | 6250.3 | 19995  | 9766.5 | 16235  | 13390  | 14408  | 10108  | 7077.9 | 10662  | 7255.9 |
| Hyperoside                 | flavonoids | 5489.1 | 12370  | 24763  | 4690.5 | 17022  | 10616  | 7291.5 | 5062.6 | 81798  | 1921.1 | 33176  | 1215.2 |
| Luteolin-6-C-glucoside     | Flavonoids | 18050  | 20650  | 8267   | 7825.6 | 10756  | 8365.2 | 128667 | 134559 | 7095.2 | 71491  | 49501  | 165137 |
| 7-Hydroxyflavone           | Flavonoids | 14291  | 14675  | 9784.5 | 14027  | 4619.3 | 15200  | 16241  | 18070  | 24888  | 31850  | 32058  | 22647  |
| Fustin                     | Flavonoids | 18935  | 4924.8 | 9831.3 | 12508  | 8773.9 | 17417  | 2407   | 2175.8 | 2525.9 | 3900.1 | 1161.2 | 1710.8 |
| Astilbin                   | Flavonoids | 10468  | 17768  | 14264  | 4658.6 | 12046  | 11011  | 1907.8 | 2095   | 800.91 | 424.51 | 1637.4 | 427.28 |
| 3,8'-Biapigenin            | Flavonoids | 18687  | 10638  | 11538  | 11552  | 6230.1 | 9437   | 7179   | 12685  | 9217.2 | 7684.5 | 18977  | 6239.5 |
| 2,3-Dihydro-2-phenyl-4H-   | Flavonoids | 9877.8 | 4754.6 | 20528  | 8815.8 | 11370  | 11456  | 6206.8 | 15455  | 8473.2 | 4116.3 | 9479.2 | 6547.1 |
| Hinokiflavone              | Flavonoids | 18687  | 8340.6 | 11538  | 11751  | 6230.1 | 9437   | 7179   | 12685  | 9217.2 | 7684.5 | 18977  | 6239.5 |
| Norwogonin                 | Flavonoids | 10547  | 15687  | 7921   | 14673  | 9503.9 | 6756.2 | 15110  | 10760  | 10869  | 6981.8 | 9903.8 | 7149.8 |
| Genistein                  | flavonoids | 10874  | 11158  | 12078  | 10111  | 5946.4 | 12218  | 8771.3 | 10199  | 1436.8 | 5238   | 4727.8 | 6045.9 |
| Biochanin A                | flavonoids | 4861.9 | 16374  | 5313.4 | 12416  | 3853.7 | 13919  | 18470  | 23912  | 20046  | 12564  | 4278.6 | 8603.7 |
| Procyanidin B4             | Flavonoids | 14816  | 771.23 | 4600.3 | 15700  | 11643  | 6982.2 | 7097.7 | 3539.7 | 0      | 3108.6 | 0      | 2141.7 |
| Pedalitin                  | Flavonoids | 10423  | 6799.5 | 5480.2 | 9604.7 | 12392  | 8502.3 | 8346.2 | 10697  | 7258.5 | 12444  | 5304.6 | 9215.1 |
| Gallocatechin              | flavonoids | 9833.4 | 2911.1 | 8359.4 | 9021.9 | 7587.8 | 14282  | 3815.5 | 3278.9 | 1817.3 | 4222.9 | 3558.7 | 2549.9 |
| Procyanidin A2             | Flavonoids | 5419.7 | 7348.1 | 5710.5 | 12685  | 4872.7 | 11742  | 698.82 | 1180.3 | 700.18 | 1531.5 | 760.6  | 6123.9 |
| Homoorientin               | flavonoids | 18050  | 3100.8 | 2605.9 | 8605.1 | 5111.9 | 10216  | 128667 | 134559 | 5083.2 | 71491  | 361855 | 165137 |
| Robinetin                  | Flavonoids | 3347.2 | 8793.2 | 2556.1 | 3770.4 | 12246  | 13458  | 6875.3 | 11039  | 6972.1 | 14513  | 7129.2 | 8869.9 |
| Isovitexin 2"-O-arabinosid | Flavonoids | 2332.1 | 5746.1 | 0      | 2922.3 | 12751  | 19081  | 36765  | 43830  | 10405  | 60777  | 45763  | 57742  |
| Isovitexin                 | Flavonoids | 7979.7 | 6819.6 | 12639  | 1343.4 | 4224.4 | 9642.6 | 6660.2 | 10613  | 27413  | 8171.6 | 10123  | 2831.8 |
| Daidzein-4',7-diglucoside  | Flavonoids | 3804.1 | 11504  | 6061.8 | 11609  | 905.77 | 8598.2 | 1880.7 | 1940.2 | 2313.5 | 5981.3 | 1198.1 | 1423   |
| 4',7-Isoflavandiol         | Flavonoids | 9077.3 | 7324   | 0      | 6951.4 | 10122  | 5984.7 | 5138   | 6565.1 | 4528.2 | 7348.7 | 8274.6 | 3420.7 |
| 3',4',7-Trihydroxyisoflavo | Flavonoids | 7118.1 | 6746.6 | 4647.2 | 8155.3 | 8085.8 | 4680.7 | 5054.5 | 3337.9 | 5366   | 2857   | 5319.4 | 9929.1 |
| Homoeriodictyol            | Flavonoids | 10141  | 4893.2 | 6042   | 5188.3 | 4773.4 | 7688.8 | 10803  | 6764.9 | 17399  | 10752  | 14597  | 17590  |
| isoliquiritigenin          | flavonoids | 6434   | 9458.3 | 4675.2 | 6981.7 | 5633.2 | 4337.2 | 5855.4 | 7768.6 | 3730.9 | 6875.9 | 6242.3 | 6465.5 |
| Swertiajaponin             | Flavonoids | 9704.5 | 5139.8 | 5516.3 | 9077.7 | 4849.8 | 1978.4 | 19952  | 59283  | 15533  | 19244  | 52838  | 17664  |
| Demethoxycapillarisin      | Flavonoids | 3704   | 6972.6 | 7002.6 | 5235.8 | 8400.8 | 4834.6 | 876.69 | 2254.8 | 888.3  | 3813.3 | 4431.3 | 3680.2 |
| Isosakuranetin             | Flavonoids | 1408.5 | 5436   | 908.28 | 1890.9 | 21896  | 4065.8 | 1989   | 1811.8 | 3971   | 2035   | 2894.8 | 4549.7 |
| Vitexin                    | flavonoids | 3233.9 | 1349.1 | 11011  | 1343.4 | 8502.8 | 9642.6 | 6660.2 | 10613  | 125136 | 8171.6 | 10123  | 5384.8 |

|                           |            |        |        |        |        |        |        |        |        |        |        |        |        |
|---------------------------|------------|--------|--------|--------|--------|--------|--------|--------|--------|--------|--------|--------|--------|
| Diosmetin                 | flavonoids | 2455   | 0      | 4659.8 | 5565.1 | 11967  | 10053  | 30320  | 65281  | 54285  | 69658  | 140318 | 118204 |
| Fisetin                   | flavonoids | 3815.7 | 4957.7 | 2318.1 | 1774.4 | 7672.4 | 13895  | 1199.8 | 881.72 | 1750   | 3448.7 | 601.65 | 1457.4 |
| Chrysoeriol 7-apiosylgluc | Flavonoids | 4031.5 | 8891   | 2425.3 | 6665.4 | 6117.6 | 5119.7 | 8606.9 | 5096   | 20273  | 5792.1 | 21725  | 4021.7 |
| 2'-Hydroxydaidzein        | Flavonoids | 4851.7 | 4714.1 | 8455.1 | 6851.6 | 6188.7 | 1782.3 | 4615.5 | 6613.2 | 7304.2 | 6457.4 | 5554   | 4064.7 |
| Galangin                  | flavonoids | 5147.2 | 3324.1 | 10977  | 8373.4 | 2123.4 | 2093.3 | 5049.9 | 5426.5 | 4829.3 | 6928.7 | 3041.4 | 1893   |
| 2'-Hydroxygenistein       | Flavonoids | 2268.4 | 2742.8 | 3165.3 | 17738  | 3783.1 | 2100.9 | 1250   | 3414   | 2517   | 2808.4 | 4382.7 | 3232.8 |
| Irisflorentin             | Flavonoids | 963.26 | 0      | 2395.6 | 0      | 1001.2 | 26958  | 17682  | 52307  | 9341.3 | 57558  | 23189  | 15123  |
| Morin                     | Flavonoids | 902.93 | 3276.9 | 3231   | 7914.9 | 2236.3 | 13387  | 2467.8 | 1596.8 | 3453.9 | 2738   | 1868.3 | 4499   |
| (+)-Afzelechin            | Flavonoids | 9292.8 | 4594.1 | 7627.9 | 4072   | 2291.4 | 2070.9 | 8242.3 | 3991.1 | 6762.6 | 9930.2 | 5231.8 | 7573.2 |
| Methyl hesperidin         | Flavonoids | 1800.5 | 0      | 4133.6 | 9468.3 | 8756.7 | 5305.2 | 9449.8 | 25995  | 16593  | 6160.4 | 16506  | 6093   |
| 4',5,6,7-Tetramethoxyflav | Flavonoids | 4070.6 | 8965.3 | 2737.5 | 7299.2 | 2003.5 | 4054.3 | 13760  | 7445.8 | 5743.9 | 4720   | 8701.8 | 7551.4 |
| Saponarin                 | Flavonoids | 5474.4 | 0      | 617.56 | 1707.2 | 3829.5 | 17374  | 91208  | 98673  | 91823  | 88909  | 214536 | 178844 |
| Schaftoside               | Flavonoids | 4575.4 | 7925.5 | 1252   | 5037.1 | 3237.6 | 6578.5 | 10728  | 9858.8 | 2755.1 | 24075  | 13471  | 16097  |
| Isorhamnetin-3-O-nehespe  | flavonoids | 2073.8 | 880.99 | 2573.4 | 4394.3 | 873.67 | 17431  | 2924   | 16180  | 0      | 10783  | 5146.4 | 8783.4 |
| 4'-Methoxyflavone         | Flavonoids | 4751.7 | 6024.5 | 6834.5 | 3481.7 | 3126.9 | 3901.2 | 8349.8 | 28366  | 5594   | 14548  | 10022  | 7827   |
| 3,9-Dihydroxypterocarpan  | Flavonoids | 6708.9 | 3107.7 | 4070.7 | 3818.2 | 3942   | 5953.9 | 3345.5 | 3297.2 | 7597.6 | 4670.8 | 3094   | 6007.3 |
| Delphinidin               | Flavonoids | 3069   | 2239.6 | 7386.9 | 5514.9 | 3702.2 | 4881.5 | 7068.9 | 3255   | 1451.2 | 3006.2 | 369.1  | 1115.8 |
| Daidzin                   | flavonoids | 3056.4 | 1366.4 | 6328.2 | 1036.6 | 3028.4 | 11835  | 2731.1 | 2271.5 | 1522.5 | 1028.1 | 1008   | 4198.1 |
| Liquiritigenin            | Flavonoids | 4388.1 | 4605.6 | 4330   | 3265.7 | 3307   | 6710.6 | 2800.1 | 2863   | 3157.8 | 2439.9 | 2636.1 | 2426.9 |
| Plantagoside              | Flavonoids | 3489   | 1139.5 | 2148.9 | 2260.3 | 8765.2 | 8643   | 0      | 1905.5 | 371.79 | 1917.5 | 0      | 6435   |
| Homopterocarpin           | Flavonoids | 9133.6 | 3188.9 | 3019.3 | 4717.7 | 3836.8 | 2501   | 2061.4 | 2834.8 | 4159.4 | 4439.4 | 3041.8 | 2754.2 |
| 4',5,7-Trimethoxyflavone  | Flavonoids | 4471.4 | 3009.6 | 4580.2 | 7345.9 | 4055.4 | 2001.8 | 5990.2 | 5796.2 | 3166.9 | 4627.7 | 9901.2 | 3394.7 |
| Nobiletin                 | Flavonoids | 5877   | 0      | 0      | 12005  | 0      | 7180   | 6908.7 | 8192.8 | 4121.1 | 0      | 3012.3 | 7922.5 |
| Phloretin                 | flavonoids | 7468   | 2007.7 | 1559   | 763.23 | 8415.6 | 4788   | 6533.7 | 12403  | 4694.3 | 8246   | 4949.5 | 6283   |
| Sciadopitysin             | Flavonoids | 7524.8 | 2839.3 | 0      | 4678.8 | 3553.4 | 6082.8 | 7287.1 | 4829.7 | 3279.9 | 10129  | 12487  | 4659.1 |
| Apigenin                  | Flavonoids | 5161.9 | 2866.9 | 3234.6 | 6458.4 | 4522.4 | 2386.6 | 7427.9 | 6633   | 3480.9 | 10754  | 9096.1 | 3236   |
| Apiin                     | Flavonoids | 5786   | 6208.2 | 2617.3 | 924.36 | 5268.2 | 3557.8 | 0      | 433.82 | 0      | 0      | 0      | 0      |
| Icariin                   | flavonoids | 0      | 0      | 2026.3 | 0      | 985.1  | 21012  | 0      | 558.07 | 1610.9 | 340.9  | 0      | 842.46 |
| Glycitein                 | Flavonoids | 756.24 | 2933.3 | 1402.2 | 2585.2 | 15211  | 715.02 | 713.95 | 1289.3 | 1277.1 | 1200.2 | 1988.8 | 0      |
| Flavone                   | Flavonoids | 3118.8 | 2397.7 | 3047.8 | 9232.9 | 2568.3 | 3153.8 | 1242.7 | 3550   | 7420.4 | 2413.2 | 3132.8 | 3846.8 |
| Glycitin                  | flavonoids | 1407.9 | 986.38 | 0      | 2797.7 | 11276  | 5682.3 | 1996.4 | 1006.5 | 981.41 | 465.94 | 476.69 | 3783.2 |
| Resokaempferol            | Flavonoids | 4571.9 | 3519.6 | 6186.6 | 3370.3 | 1952.9 | 2252.5 | 3967.5 | 2363.5 | 2212.4 | 2259.6 | 1664.2 | 4335.9 |

|                           |                     |        |        |        |        |        |        |        |        |        |        |        |        |
|---------------------------|---------------------|--------|--------|--------|--------|--------|--------|--------|--------|--------|--------|--------|--------|
| Butin                     | Flavonoids          | 3813.9 | 4505.1 | 1585.2 | 2661.7 | 4623.1 | 4653.4 | 13975  | 4053.4 | 4333.9 | 8473.3 | 4669.3 | 7615.7 |
| Myricetin                 | flavonoids          | 2601.2 | 6994   | 3142.8 | 3226.7 | 1650.5 | 3711.5 | 2981.7 | 2901   | 1728.6 | 2399.2 | 2387.7 | 0      |
| Chrysin                   | flavonoids          | 1189.9 | 7884.1 | 4736.2 | 1700.7 | 1763.5 | 3802.2 | 8982.9 | 2950.4 | 2392.9 | 2426.1 | 6943.1 | 2452.1 |
| Meloside A                | Flavonoids          | 5126.2 | 0      | 2236.7 | 1707.2 | 3829.5 | 8067.3 | 126499 | 98673  | 91823  | 100921 | 214536 | 201036 |
| Vitexin 2"-glucoside      | Flavonoids          | 5126.2 | 0      | 2236.7 | 1707.2 | 3829.5 | 8067.3 | 91208  | 98673  | 91823  | 88909  | 214536 | 201036 |
| Dihydrorobinetin          | Flavonoids          | 2843.1 | 631.04 | 4767   | 3764.7 | 3529.7 | 5074.3 | 4295.1 | 3776   | 1809.5 | 1275.3 | 1213.9 | 598.9  |
| Pinobanksin               | Flavonoids          | 1699.5 | 2354.7 | 1851.2 | 4370.6 | 2684.8 | 7579.3 | 4718.3 | 5014   | 3305.4 | 4953.4 | 4218.6 | 1788.3 |
| Quercetin                 | flavonoids          | 2261.5 | 5233.9 | 2282   | 1103.6 | 1131.4 | 8263.7 | 379.05 | 392.74 | 376.37 | 193.17 | 187.47 | 562.52 |
| Baicalein                 | Flavonoids          | 1198.6 | 1385   | 6145.7 | 5104.5 | 3767.2 | 2259.1 | 3498.5 | 4947.2 | 1723.4 | 4181.2 | 3804.2 | 3100   |
| 4',7-Dihydroxyflavone     | Flavonoids          | 1031.8 | 3963.5 | 4506.1 | 2840.4 | 3515.1 | 3050.6 | 701.55 | 956.1  | 477.75 | 3496.3 | 1209.5 | 460.05 |
| 7,8-Dihydroxyflavone      | Flavonoids          | 2447.8 | 1198.4 | 3903.9 | 2417.9 | 5560.7 | 3372.4 | 1348.3 | 5256.1 | 1021.8 | 2361.4 | 2657.3 | 4579.5 |
| Silibinin                 | flavonoids          | 1470.2 | 1444.9 | 6651.6 | 2485.4 | 2051.7 | 3628.9 | 1988.2 | 2124.8 | 0      | 4028.7 | 1522.8 | 711.09 |
| Isoscoparin               | Flavonoids          | 1217.8 | 2955.3 | 772.38 | 1188.2 | 4705.9 | 3624.1 | 5152.8 | 8002.2 | 0      | 0      | 3230.5 | 2681.5 |
| Kuwanon H                 | Flavonoids          | 6241.6 | 1516.8 | 0      | 3849   | 0      | 1597.1 | 7547.6 | 2372   | 0      | 0      | 3125.2 | 2846   |
| Theaflavin                | Flavonoids          | 5095.3 | 0      | 0      | 937.93 | 2363.1 | 3788.2 | 0      | 236.13 | 230.51 | 0      | 0      | 0      |
| Poncirin                  | Flavonoids          | 874.13 | 891.89 | 1909.5 | 1471.9 | 5793.1 | 1203   | 3389.1 | 2237.3 | 2713.5 | 1883.7 | 2893.5 | 3287.9 |
| Tectochrysin              | flavonoids          | 0      | 1506.7 | 6616.7 | 0      | 2110   | 1495.7 | 0      | 3314.2 | 7708.2 | 0      | 5552.6 | 0      |
| Homoferreirin             | Flavonoids          | 278.34 | 3085.5 | 3434.7 | 2294.1 | 839.48 | 1729.4 | 2839.8 | 2349   | 858.64 | 1610.6 | 2600.1 | 2266.1 |
| 5,7-Dihydroxyisoflavone   | Flavonoids          | 1231.8 | 1222   | 2039.8 | 4193.9 | 2263.4 | 589.22 | 767.9  | 1680.6 | 2967.3 | 1960.3 | 2274.8 | 2307.6 |
| Scutellarein              | Flavonoids          | 2134.6 | 1158.7 | 1393.5 | 1279.2 | 1062.5 | 4071.4 | 1338.2 | 5834   | 3410.7 | 1865.8 | 8759.7 | 3200.5 |
| Hesperetin                | Flavonoids          | 657.82 | 913.04 | 2051.2 | 1638.2 | 2128.5 | 3248.5 | 3557.5 | 2822.9 | 837.1  | 1247.7 | 1482.7 | 2017.9 |
| Cyanidin-3-O-rutinoside c | Flavonoids          | 1558.3 | 1254.4 | 844.85 | 840.99 | 3251   | 1316   | 1919.1 | 2414.5 | 2055.5 | 1304.5 | 2849.9 | 1479.5 |
| Glabridin                 | Flavonoids          | 1819.5 | 0      | 0      | 0      | 5493   | 1259   | 6952.8 | 0      | 6879.3 | 0      | 3594.1 | 1750.5 |
| Ononin                    | Flavonoids          | 1019.3 | 1496.5 | 463.89 | 1190.6 | 708.43 | 3631.5 | 714.35 | 3427.6 | 486.92 | 1090   | 735.74 | 945.06 |
| Luteolin                  | flavonoids          | 1324.4 | 270.06 | 1055.4 | 540.04 | 1399.7 | 2206.7 | 1071.3 | 1137.5 | 2166   | 1723.1 | 16438  | 6060.8 |
| Liquiritin                | Flavonoids          | 448.61 | 904.5  | 0      | 2905.9 | 1991.8 | 348.23 | 466.96 | 0      | 1381.8 | 0      | 473.61 | 4544.8 |
| Cyanidin-3-O-rhamnoside   | Flavonoids          | 464.65 | 244.73 | 0      | 1681.4 | 245.7  | 3459.1 | 469.43 | 746.34 | 2363.5 | 0      | 713.66 | 230.95 |
| Tangeretin                | flavonoids          | 0      | 1927.5 | 0      | 0      | 0      | 1424   | 5596.9 | 0      | 0      | 0      | 0      | 0      |
| D-Glucurono-6,3-lactone   | Furofurans          | 8218.7 | 28350  | 14080  | 9851.7 | 9481.6 | 15307  | 32924  | 15739  | 19456  | 23083  | 13752  | 16047  |
| DG(16:0/16:0/0:0)         | Glycerolipids       | 571302 | 30547  | 28397  | 23068  | 24119  | 9625.5 | 40199  | 1E+06  | 29505  | 22524  | 74027  | 518988 |
| Malic acid                | Hydroxy acids and d | 1E+06  | 867319 | 491683 | 1E+06  | 426138 | 113180 | 656148 | 739382 | 702381 | 374039 | 1E+06  | 1E+06  |
| Sinapyl alcohol           | Hydroxycinnamoyl c  | 3488.1 | 1086.7 | 781.16 | 2420.7 | 1102.1 | 5306.3 | 2544.8 | 2965.6 | 1584.1 | 2983.3 | 1068.6 | 1252.2 |

|                           |                       |        |        |        |        |        |        |        |        |        |        |        |        |
|---------------------------|-----------------------|--------|--------|--------|--------|--------|--------|--------|--------|--------|--------|--------|--------|
| AICAR                     | Imidazole ribonucle   | 396898 | 298999 | 301668 | 542961 | 318270 | 228694 | 292191 | 365732 | 239486 | 27170  | 54568  | 356290 |
| 7-Methylguanine           | Imidazopyrimidines    | 3155.4 | 2953.9 | 5667.8 | 3157.4 | 4478   | 758.39 | 2160.9 | 661.5  | 1543.2 | 1309.9 | 1865.2 | 2529.8 |
| Levamisole                | Imidazothiazoles      | 32122  | 40638  | 40391  | 44925  | 36160  | 21866  | 32597  | 71402  | 21843  | 39176  | 36564  | 38567  |
| 3-Indoleacetonitrile      | Indole derivatives    | 13347  | 4138.8 | 3548   | 4903.1 | 4298.5 | 4845.3 | 9343   | 7556.9 | 3240.7 | 4709.6 | 6729.8 | 9216.6 |
| Leukoaminochrome          | Indoles and derivativ | 34781  | 34159  | 37976  | 66894  | 37512  | 21012  | 46693  | 48262  | 37729  | 54002  | 69654  | 49889  |
| 1H-Indole-2,3-dione       | Indoles and derivativ | 9133.1 | 28174  | 13430  | 15188  | 6159.5 | 6734.7 | 3713.6 | 11175  | 5051.4 | 7017.1 | 5309.8 | 5171.7 |
| Leucodopachrome           | Indoles and derivativ | 5714.2 | 9923.6 | 21730  | 4500.2 | 10093  | 7779.9 | 12206  | 10525  | 27056  | 9371.6 | 18708  | 22389  |
| Methoxyindoleacetic acid  | Indoles and derivativ | 12562  | 9109.8 | 11097  | 4522.9 | 10163  | 4593.7 | 5617.8 | 4312.4 | 5899.2 | 7012.5 | 6236.9 | 4060.5 |
| 5-Hydroxyindole-3-acetic  | Indoles and derivativ | 4836.5 | 7524.1 | 3001.3 | 4922.6 | 3658.8 | 7469.9 | 2415.2 | 602.23 | 1770.8 | 3582.7 | 3634   | 6033.6 |
| Valechlorine              | Iridoids              | 11184  | 2460.5 | 8659.8 | 6070.7 | 5137.7 | 386.3  | 8107.1 | 2073.1 | 3546.8 | 4564.2 | 1158.2 | 1174.1 |
| Geniposide                | Iridoids              | 1253.3 | 0      | 8453.9 | 0      | 4595.2 | 3184.8 | 0      | 4667.1 | 1239.6 | 1275.3 | 2426.1 | 3358.8 |
| Pseudobaptigenin          | Isoflavonoids         | 7977.5 | 3670   | 3976   | 8701.6 | 1237.3 | 7179.2 | 9094.9 | 2982.5 | 4203   | 6098.6 | 5695.9 | 2466.1 |
| (S)-2-Acetolactate        | Keto acids and deriv  | 101694 | 116437 | 97928  | 100545 | 66343  | 11219  | 5795.8 | 3092.2 | 3430.6 | 8300.2 | 10658  | 5611.5 |
| 2-Keto-6-acetamidocaproa  | Keto acids and deriv  | 83176  | 39599  | 46551  | 36622  | 44480  | 97792  | 19597  | 26538  | 17809  | 19903  | 26623  | 9739.3 |
| (S)-2-Aceto-2-hydroxybut  | Keto acids and deriv  | 58806  | 38251  | 59660  | 33281  | 62753  | 68986  | 32021  | 41201  | 49893  | 91377  | 89653  | 39314  |
| 2-Isopropyl-3-oxosuccinat | Keto acids and deriv  | 8483.9 | 6675.1 | 4338.8 | 6718.9 | 7868.9 | 9801.9 | 4488.4 | 5704.5 | 6647.2 | 8272.7 | 6334.6 | 7152.7 |
| Prephenate                | Keto acids and deriv  | 681.23 | 1194.4 | 790.45 | 3630.1 | 1974.2 | 975.63 | 1874.5 | 707.57 | 2209.8 | 2097.3 | 669.21 | 2873.3 |
| Neocnidilide              | Lactones              | 4804.6 | 7089.4 | 2581.4 | 4999.4 | 10529  | 4692.1 | 10293  | 2563.3 | 4259.4 | 3537.3 | 5405.5 | 16730  |
| Liriodendrin              | Lignans               | 256072 | 58920  | 223399 | 327235 | 0      | 235334 | 181903 | 109564 | 0      | 0      | 2274   | 105443 |
| Nordihydroguaiaretic acid | Lignans               | 13186  | 7134   | 9124.1 | 3165.2 | 16966  | 24577  | 2048   | 2245.2 | 2820.3 | 3508.7 | 1652.8 | 3475.8 |
| Kadsurin A                | Lignans               | 15405  | 2187.5 | 21430  | 3352.3 | 1269.3 | 4270   | 11785  | 3607.5 | 5688.3 | 2739.5 | 4659.9 | 13194  |
| Butyl 4-Hydroxybenzoate   | Lignans               | 5631.5 | 9415.3 | 10822  | 12520  | 3183.4 | 6204.7 | 8428.7 | 6433.7 | 3816.6 | 5274.4 | 11435  | 10459  |
| Yatein                    | Lignans               | 3322   | 631.53 | 2762.2 | 4681   | 7695   | 7436.1 | 1605.8 | 4648.5 | 634.53 | 5015.6 | 3868.2 | 1829.5 |
| Anwulignan                | Lignans               | 3081.8 | 1308.7 | 3967.5 | 9000.1 | 1336   | 6306.2 | 5364.7 | 9468.5 | 3159.8 | 17501  | 4209.8 | 4772.2 |
| gamma-Diasarone           | Lignans               | 1293.1 | 8026.6 | 852.26 | 1742.4 | 443.35 | 1813.5 | 431.47 | 2303.9 | 1727.8 | 1770.7 | 3601.9 | 1273.2 |
| Arctiin                   | Lignans               | 952.68 | 0      | 0      | 0      | 0      | 11898  | 7619.6 | 8569.5 | 3253.2 | 13532  | 3218.4 | 4432.5 |
| Schisandrol A             | Lignans               | 1388   | 2797.5 | 1383.4 | 3993.7 | 667.17 | 708.46 | 2764   | 3679.8 | 0      | 8605.8 | 10765  | 2802   |
| Podophyllotoxin           | Lignans               | 1689.2 | 409.34 | 201.53 | 2045   | 1477.1 | 1905.8 | 1276.3 | 1639.8 | 2296.6 | 2225.7 | 2556.7 | 2197.1 |
| Acanthoside B             | Lignans               | 0      | 0      | 0      | 3328.2 | 2643.9 | 0      | 11865  | 0      | 0      | 4172.8 | 29446  | 25195  |
| Guaiacin                  | Lignans               | 224.35 | 0      | 0      | 0      | 1412   | 1378.7 | 1125.6 | 1846.8 | 222.05 | 5640.9 | 681.33 | 2001.8 |
| Palmitic acid             | Lipids                | 45418  | 50907  | 24053  | 73878  | 117906 | 94943  | 68338  | 107216 | 22994  | 25862  | 66961  | 105686 |
| Myristoleic acid          | Lipids                | 17473  | 11608  | 15165  | 6854   | 9248.1 | 14598  | 7934.3 | 12974  | 10142  | 3931.5 | 6016.7 | 16591  |

|                              |                        |        |        |        |        |        |        |        |        |        |        |        |        |
|------------------------------|------------------------|--------|--------|--------|--------|--------|--------|--------|--------|--------|--------|--------|--------|
| 13-HPODE                     | Lipids                 | 5478.2 | 4544.4 | 14288  | 14708  | 13754  | 16362  | 111343 | 242736 | 81203  | 269697 | 159489 | 77045  |
| Chamazulene                  | lipids                 | 7522.5 | 13960  | 6489.6 | 8910.4 | 11396  | 9373   | 4859.1 | 14767  | 3994.1 | 10062  | 5378.9 | 16397  |
| alpha-Zearalenol             | Macrolides and analogs | 25800  | 543.45 | 36145  | 31878  | 1669.2 | 44167  | 5117.4 | 2259   | 1646   | 100113 | 26844  | 3350.9 |
| Tiglic acid                  | Miscellaneous          | 983929 | 190825 | 263720 | 772887 | 1E+06  | 2E+06  | 161169 | 259835 | 666803 | 315668 | 594481 | 191100 |
| Diallyl disulfide            | Miscellaneous          | 218581 | 153802 | 522034 | 285630 | 297209 | 408491 | 185014 | 255078 | 268424 | 286427 | 327393 | 445309 |
| 2-Pentylfuran                | Miscellaneous          | 144264 | 133402 | 130254 | 98531  | 122677 | 282427 | 160951 | 81546  | 265206 | 345592 | 85716  | 116743 |
| Ethyl caproate               | Miscellaneous          | 105018 | 202819 | 95123  | 206755 | 128090 | 123630 | 152027 | 170292 | 140914 | 150042 | 196656 | 203363 |
| O-Phosphorylethanolamine     | Miscellaneous          | 143220 | 86290  | 124589 | 70991  | 122183 | 0      | 0      | 0      | 30030  | 0      | 14824  | 0      |
| D-Arabinose                  | Miscellaneous          | 20397  | 30914  | 27152  | 32529  | 12253  | 7925.4 | 24700  | 17081  | 11043  | 10792  | 11302  | 21192  |
| Ethyl isovalerate            | Miscellaneous          | 21710  | 29882  | 9115.9 | 22753  | 14067  | 11319  | 15201  | 17181  | 67053  | 18967  | 83871  | 25069  |
| Pregabalin                   | Miscellaneous          | 11872  | 14083  | 14305  | 15591  | 16420  | 35262  | 19218  | 15776  | 10077  | 10366  | 35800  | 28377  |
| 1-Octacosanol                | Miscellaneous          | 30295  | 10906  | 7057.1 | 19508  | 28264  | 9317.7 | 23326  | 18787  | 5295.7 | 1322.1 | 4501.8 | 8971   |
| Furfuryl acetate             | Miscellaneous          | 9258.9 | 14879  | 12328  | 17788  | 9383.3 | 23867  | 28590  | 21211  | 8681.4 | 13873  | 16328  | 17367  |
| Methyl linoleate             | Miscellaneous          | 5478.2 | 4544.4 | 14288  | 29071  | 13754  | 16362  | 209765 | 242736 | 127211 | 269697 | 588582 | 172768 |
| Bakkenolide A                | Miscellaneous          | 17150  | 9259.8 | 7342.8 | 22349  | 14757  | 11548  | 17483  | 25521  | 5689.1 | 5917.2 | 10722  | 16380  |
| Panaxynol                    | Miscellaneous          | 7719.7 | 8067.5 | 17138  | 17280  | 15343  | 10386  | 8259.9 | 25259  | 6332   | 12530  | 12332  | 15368  |
| Astaxanthin                  | Miscellaneous          | 8135.2 | 13322  | 6920.1 | 13012  | 27346  | 4645.2 | 12477  | 21503  | 8042.6 | 7539.6 | 17776  | 8943.8 |
| Allicin                      | Miscellaneous          | 15716  | 10150  | 9889.8 | 12688  | 11122  | 10808  | 13283  | 5457   | 5027.5 | 6592.6 | 3670.8 | 7518.1 |
| Undecanolactone              | Miscellaneous          | 7588.1 | 9124.8 | 19149  | 9080.7 | 8563.9 | 13956  | 14339  | 11400  | 14437  | 16899  | 26340  | 21935  |
| Alliin                       | Miscellaneous          | 18149  | 9949.6 | 2228.3 | 7863   | 6338.6 | 13405  | 5096.4 | 4290.4 | 2247.8 | 6122.9 | 4705.1 | 3458.8 |
| (R)-Acetoin                  | Miscellaneous          | 11420  | 5748.7 | 11264  | 9827.9 | 7633.6 | 8529.1 | 24395  | 21096  | 9719.8 | 13687  | 19708  | 17749  |
| Fingolimod hydrochloride     | Miscellaneous          | 9224.5 | 12181  | 12458  | 10465  | 3774.2 | 1854.1 | 26716  | 15135  | 8535.8 | 10689  | 15604  | 3817.2 |
| Sulforaphane                 | Miscellaneous          | 8552.7 | 7725.1 | 9027.5 | 8281   | 10584  | 2960.3 | 4251.6 | 33460  | 8303.4 | 7144.1 | 16514  | 9316.2 |
| L-Quebrachitol               | Miscellaneous          | 7682.9 | 4496.1 | 12363  | 4788.7 | 10860  | 3813.5 | 6755.7 | 2641.3 | 1754.8 | 4136.2 | 3128.4 | 2359.2 |
| Homodihydrocapsaicin I       | Miscellaneous          | 6187.2 | 5530.4 | 6125.6 | 8830.9 | 11288  | 5819.5 | 7572.2 | 7191.5 | 5510.5 | 3079.7 | 2729.1 | 5616   |
| 3-Butylidenephthalide        | Miscellaneous          | 3354   | 17939  | 6207.1 | 7395   | 2813.2 | 3792.6 | 5375.7 | 6790.7 | 7494.8 | 8292.8 | 6673.5 | 3758.8 |
| Pogostone                    | Miscellaneous          | 10741  | 5041.8 | 6532   | 5980   | 5646.4 | 6189.2 | 5392.4 | 7726   | 3935   | 9487.7 | 18055  | 6005.5 |
| 6(1H)-Azulenone, 2,3-dihydro | Miscellaneous          | 8345.8 | 549.62 | 5609.3 | 7995.8 | 4325.1 | 3886.3 | 2839.7 | 5866.2 | 1147.2 | 2252.1 | 4520.9 | 8076.2 |
| Homobaldrinal                | Miscellaneous          | 6711.3 | 3705.8 | 3176.3 | 3608.4 | 6238.5 | 6613.7 | 2503.1 | 1858.3 | 3040.7 | 7432.2 | 5016.2 | 3308   |
| D-Pinitol                    | Miscellaneous          | 11723  | 5200.6 | 2142.9 | 5750.1 | 1976.1 | 2252.6 | 3686   | 2968.3 | 10099  | 3122.1 | 3925.8 | 3731.8 |
| 3-Nitro-L-tyrosine           | Miscellaneous          | 1660.5 | 7805.3 | 1576   | 9225.8 | 5416.3 | 3023.8 | 4094.4 | 4836.6 | 5284.4 | 6753   | 9822.7 | 2882.2 |
| Baldrinal                    | Miscellaneous          | 2330.9 | 4174.7 | 3899.6 | 1994.9 | 5871.8 | 5230.1 | 4325.9 | 4651.1 | 7956   | 4636.1 | 4976.7 | 3091.9 |



|                                  |                               |        |        |        |        |        |        |        |        |        |        |        |        |
|----------------------------------|-------------------------------|--------|--------|--------|--------|--------|--------|--------|--------|--------|--------|--------|--------|
| Lusianthridin                    | Miscellaneous                 | 2353.6 | 2367.1 | 2329.9 | 4344.8 | 1721.1 | 1386.3 | 3092.5 | 6777.3 | 2731.8 | 1923.9 | 1470.3 | 2315.8 |
| Agomelatine                      | Miscellaneous                 | 2214.8 | 797.04 | 2805.8 | 1480.7 | 2743.8 | 1235.9 | 1690   | 1077.8 | 1384.4 | 1587.2 | 3939.1 | 1708   |
| Cheilanthifoline                 | Miscellaneous                 | 2232.3 | 2657.9 | 1110.1 | 2398.5 | 1052.6 | 1203.3 | 3493.9 | 1172   | 1465.9 | 937.33 | 1271.2 | 1135.3 |
| Torachryson 8-O-glucoside        | Miscellaneous                 | 1470.7 | 1466.7 | 2131.3 | 1067.3 | 3735.7 | 710.62 | 5196.8 | 4571   | 10487  | 5590.5 | 5643.4 | 3205.8 |
| Acitretin                        | Miscellaneous                 | 435.43 | 460.6  | 2505.8 | 1121.3 | 4892.3 | 946.46 | 1115.2 | 927.07 | 1576.2 | 1444.6 | 1838.8 | 2028.2 |
| Phytic acid                      | Miscellaneous                 | 2525   | 2894.9 | 1674.7 | 845.43 | 0      | 582.98 | 1423.1 | 295.6  | 0      | 0      | 1241.6 | 0      |
| Citronellyl acetate              | Monoterpenoids                | 15817  | 37233  | 11492  | 13711  | 22861  | 25257  | 17767  | 18803  | 11693  | 10573  | 12167  | 9894.1 |
| (+)-Carvone                      | Monoterpenoids                | 20215  | 34453  | 14019  | 33110  | 14573  | 7818.5 | 16690  | 28011  | 12116  | 19133  | 14356  | 17780  |
| Cineole                          | Monoterpenoids                | 14351  | 17930  | 11924  | 20572  | 22103  | 15937  | 12363  | 15481  | 9019   | 19453  | 13970  | 17632  |
| Cantharidin                      | Monoterpenoids                | 8288.8 | 14541  | 24835  | 6551.2 | 25023  | 18538  | 32296  | 15456  | 9637.8 | 13853  | 16168  | 14342  |
| Carvacryl acetate                | Monoterpenoids                | 9737.8 | 12278  | 16343  | 7105.3 | 18480  | 7968.1 | 11316  | 7529.8 | 23568  | 10966  | 9427.9 | 15623  |
| Nerylacetate                     | Monoterpenoids                | 16963  | 10753  | 18523  | 11835  | 6751.5 | 6837.5 | 11074  | 10233  | 6662.8 | 14074  | 15744  | 4854.1 |
| (-)-Carvone                      | Monoterpenoids                | 11685  | 13229  | 9903.3 | 8808.3 | 13785  | 11398  | 9627.4 | 12184  | 9250.4 | 32666  | 7528   | 10057  |
| beta-Citronellol                 | Monoterpenoids                | 13658  | 5279.3 | 7117.2 | 6097.9 | 10540  | 10702  | 13158  | 9414   | 5966.1 | 7424.4 | 7851   | 5775.7 |
| Bornyl acetate                   | Monoterpenoids                | 3895.9 | 8528.4 | 5002.2 | 7803.4 | 9225.5 | 5546.2 | 10804  | 6413   | 4537.8 | 14570  | 12744  | 6001.1 |
| (1R)-(-)-Menthyl acetate         | Monoterpenoids                | 3104.4 | 5808.2 | 1202.3 | 4314.9 | 1805.5 | 3483   | 1805   | 0      | 0      | 1789   | 4889.1 | 4843.5 |
| Isopulegol                       | Monoterpenoids                | 8045.1 | 2433.9 | 3518.3 | 2775.5 | 1991.7 | 921.89 | 3105.5 | 2171.9 | 3136.2 | 3299.1 | 3797.7 | 5853.5 |
| Picrocrocin                      | Monoterpenoids                | 1133.3 | 1023.5 | 2250.5 | 2302.1 | 1583.3 | 1287.5 | 4450.9 | 2264   | 3559.9 | 2865.6 | 3229.8 | 2652.1 |
| Nicotinic acid                   | Nicotinic acid derivative     | 76963  | 153007 | 225906 | 107857 | 78190  | 95831  | 262344 | 225711 | 151365 | 247664 | 294826 | 241458 |
| 6-hydroxynicotinic acid          | Nicotinic acid derivative     | 4484.1 | 3387.8 | 3433.8 | 3381.7 | 5640.9 | 7145.6 | 5493.6 | 9746.5 | 5276.1 | 7213.6 | 4266.5 | 9180.4 |
| Uridine 5'-diphospho-D-glucose   | Nucleotide and its derivative | 472164 | 2E+06  | 742710 | 2E+06  | 1E+06  | 1E+06  | 528478 | 225014 | 514831 | 934884 | 719781 | 746402 |
| Adenosine 5'-monophosphate       | Nucleotide and its derivative | 367017 | 421955 | 499092 | 504970 | 587756 | 648774 | 230027 | 431826 | 280589 | 365442 | 423836 | 571630 |
| beta-Nicotinamide mononucleotide | Nucleotide and its derivative | 81248  | 97196  | 160289 | 156846 | 107868 | 96660  | 146384 | 159049 | 121058 | 153810 | 346303 | 125530 |
| Guanosine                        | Nucleotide and its derivative | 4747   | 3241.9 | 399768 | 6734.1 | 3111.9 | 3621.3 | 5357   | 6836.7 | 376093 | 3607.8 | 4782.2 | 521688 |
| Cytosine                         | Nucleotide and its derivative | 12793  | 33397  | 26847  | 31304  | 16536  | 43990  | 39554  | 60403  | 40059  | 33341  | 54173  | 48735  |
| Cytidine                         | Nucleotide and its derivative | 12136  | 13207  | 25911  | 24938  | 13235  | 9498.7 | 55726  | 74748  | 29770  | 60623  | 61396  | 37488  |
| Purine                           | Nucleotide and its derivative | 3176.2 | 33208  | 3579.4 | 11348  | 7408.5 | 22752  | 19990  | 132852 | 153026 | 176611 | 8705.2 | 41505  |
| 3-Methylxanthine                 | Nucleotide and its derivative | 5171.7 | 26935  | 16844  | 20211  | 4132.5 | 3491.7 | 1861.9 | 1396.5 | 2059.4 | 694.99 | 3108.1 | 342.43 |
| 5'-Deoxyadenosine                | Nucleotide and its derivative | 8267.6 | 6410.8 | 13117  | 6244.1 | 5465.4 | 12251  | 95071  | 536454 | 127501 | 126527 | 278243 | 299450 |
| Cordycepin                       | Nucleotide and its derivative | 8267.6 | 6410.8 | 13117  | 6244.1 | 5465.4 | 12251  | 95071  | 536454 | 127501 | 126527 | 278243 | 299450 |
| 1-Methylxanthine                 | Nucleotide and its derivative | 2834.3 | 10690  | 9419.7 | 2538.7 | 2329.8 | 21673  | 1884.8 | 2600.9 | 1905.4 | 1479.8 | 1323   | 2403.6 |
| Uridine 5'-monophosphate         | Nucleotide and its derivative | 4344   | 22485  | 1430   | 14615  | 1015.4 | 696.11 | 0      | 324.48 | 682.59 | 0      | 1014.9 | 18261  |

|                            |                       |        |        |        |        |        |        |        |        |        |        |        |        |
|----------------------------|-----------------------|--------|--------|--------|--------|--------|--------|--------|--------|--------|--------|--------|--------|
| Uracil                     | Nucleotide and its de | 5154.7 | 3190.5 | 4755.7 | 16103  | 8081.2 | 3617   | 7126.5 | 9997.3 | 43019  | 53446  | 73743  | 5461.1 |
| 2'-Deoxyuridine            | Nucleotide and its de | 6472.2 | 4270.8 | 3418.6 | 4911.4 | 4762.3 | 11064  | 8444.2 | 10364  | 9386.7 | 5513.2 | 8941.9 | 3599.3 |
| Uridine                    | Nucleotide and its de | 5582.1 | 4717.6 | 2941   | 4978.5 | 10949  | 4736.2 | 3393.6 | 3019   | 4934.1 | 4443.3 | 5935.4 | 6432.3 |
| Thymidine                  | Nucleotide and its de | 4537.2 | 4652   | 2261.5 | 5267.7 | 5979.4 | 7186   | 3558.9 | 2923.6 | 3693.6 | 4014.3 | 4452.1 | 4046.5 |
| Deoxycytidine              | Nucleotide and its de | 4765.2 | 7935.5 | 4317.2 | 3375.9 | 2344.7 | 4752.9 | 3036.3 | 2297.4 | 4330.4 | 4076.8 | 5512.9 | 5924.3 |
| Adenosine                  | Nucleotide and its de | 4336.8 | 2385.6 | 6262.7 | 2925.9 | 1824.4 | 4263.1 | 8364.9 | 5046.5 | 8E+06  | 8023.1 | 12644  | 3E+06  |
| Deoxyadenosine             | Nucleotide and its de | 4055.5 | 2442.1 | 2485.9 | 1096.9 | 1859.9 | 4186.2 | 1188.5 | 3747.1 | 2500.2 | 3020.3 | 2501.1 | 3079.9 |
| 7-Methylxanthine           | Nucleotide and its de | 1027.7 | 1700.5 | 2078.4 | 1663.5 | 2586.8 | 3366.3 | 4639.9 | 3831.2 | 7109.1 | 4454   | 1352.3 | 2663.8 |
| 2'-Deoxyinosine-5'-monop   | Nucleotide and its de | 1162.7 | 661.42 | 979.55 | 1382.9 | 1749   | 1440.4 | 164.68 | 1613   | 949.81 | 1452.1 | 877    | 781.19 |
| Guanosine 3',5'-cyclic mor | Nucleotide and its de | 1148.6 | 694.85 | 0      | 2140.7 | 0      | 477.58 | 5309.3 | 5463.5 | 2765   | 731.41 | 0      | 4880.9 |
| Phosphoric acid            | Organic acids         | 3E+06  | 2E+06  | 3E+06  | 3E+06  | 2E+06  | 2E+06  | 1E+06  | 1E+06  | 1E+06  | 1E+06  | 962578 | 620567 |
| Argininosuccinate          | Organic acids         | 581105 | 637262 | 559881 | 450524 | 516658 | 630254 | 6637.3 | 13191  | 3341.1 | 8741.7 | 6118.7 | 7304   |
| 2-Hydroxybutanoic acid     | Organic acids         | 114464 | 164028 | 205623 | 209432 | 263149 | 194900 | 280268 | 327057 | 230051 | 368129 | 294017 | 436555 |
| 2-Picolinic acid           | Organic acids         | 50274  | 45840  | 64169  | 36180  | 38369  | 20291  | 22724  | 112015 | 85417  | 122781 | 110123 | 18940  |
| 2-Hydroxyethanesulfonate   | Organic acids         | 40426  | 29880  | 22426  | 49817  | 31252  | 20209  | 26387  | 26434  | 31813  | 33117  | 20197  | 25969  |
| Aminomalonic acid          | Organic acids         | 24560  | 24962  | 21122  | 14883  | 14485  | 5886   | 5236   | 9174.2 | 10755  | 6518.5 | 13559  | 8347.1 |
| 5-Aminolevulinate          | Organic acids         | 18005  | 15330  | 6744.6 | 16606  | 5461.2 | 756.57 | 2055.6 | 10601  | 4155.2 | 1207.5 | 952.1  | 3098.3 |
| Creatine Phosphate         | Organic acids         | 19924  | 9761.9 | 11944  | 6618.9 | 8165.6 | 4450.5 | 14000  | 9774.9 | 5715.5 | 3144.9 | 5714.6 | 3551.9 |
| Phosphonoacetate           | Organic acids         | 7598.6 | 5688.9 | 4259.6 | 6552   | 7111.6 | 5676.4 | 36106  | 51900  | 3701.2 | 4822   | 47093  | 5197   |
| Citric acid                | Organic acids         | 5474.2 | 2583.4 | 5301.1 | 2851.6 | 5945.3 | 3434.2 | 4860.9 | 9718.9 | 4134.3 | 4330   | 3383.2 | 4088.9 |
| Creatinine                 | Organic acids         | 1611.3 | 980.53 | 3290.7 | 1458.3 | 484.43 | 5030.1 | 661.94 | 3508.9 | 4920.8 | 3246.3 | 6639.7 | 5392.6 |
| cis-Aconitic acid          | Organic acids and de  | 150015 | 99460  | 160257 | 117394 | 149122 | 503624 | 140441 | 583115 | 363316 | 489404 | 746138 | 885573 |
| Glutaric acid              | Organic acids and de  | 97950  | 95355  | 94070  | 99955  | 98293  | 87442  | 84696  | 85854  | 104779 | 88884  | 72253  | 95274  |
| Shikimic acid              | Organic acids and de  | 40146  | 50015  | 77658  | 48326  | 59693  | 93235  | 123531 | 94907  | 75228  | 131865 | 135424 | 108824 |
| Fumaric acid               | Organic acids and de  | 11391  | 12471  | 11074  | 14305  | 11064  | 15141  | 24592  | 36199  | 24705  | 28388  | 27527  | 29224  |
| Betaine aldehyde           | Organonitrogen com    | 14085  | 16439  | 19491  | 20371  | 21163  | 19452  | 17268  | 24736  | 25943  | 22192  | 31371  | 28039  |
| L-Carnitine                | Organonitrogen com    | 18508  | 13535  | 28877  | 23388  | 11890  | 6597   | 33496  | 14180  | 11931  | 33814  | 19513  | 37188  |
| Sphingosine                | Organonitrogen com    | 5834.8 | 5649.5 | 4613.2 | 2342   | 5122.3 | 13837  | 11627  | 14224  | 10330  | 9197.9 | 9129.9 | 6344.5 |
| Lactulose                  | Organooxygen comp     | 1E+07  | 1E+07  | 6E+06  | 1E+07  | 1E+07  | 9E+06  | 7E+06  | 7E+06  | 1E+07  | 1E+07  | 6E+06  | 6E+06  |
| Galactose 1-phosphate      | Organooxygen comp     | 1E+06  | 2E+06  | 2E+06  | 2E+06  | 1E+06  | 1E+06  | 642918 | 575586 | 565233 | 822759 | 400133 | 631223 |
| Beta-D-Fructose 2-phosph   | Organooxygen comp     | 382917 | 627008 | 419824 | 351012 | 616974 | 273653 | 246919 | 115952 | 229184 | 292747 | 285778 | 132807 |
| Glucose 1-phosphate        | Organooxygen comp     | 313332 | 145114 | 235266 | 549900 | 353943 | 317772 | 228767 | 354700 | 220633 | 232413 | 299974 | 263067 |

|                           |                     |        |        |        |        |        |        |        |        |        |        |        |        |
|---------------------------|---------------------|--------|--------|--------|--------|--------|--------|--------|--------|--------|--------|--------|--------|
| Maltotriose               | Organooxygen comp   | 23712  | 112935 | 178001 | 37244  | 47329  | 23222  | 189255 | 158801 | 24461  | 90671  | 95327  | 98272  |
| 1-Kestose                 | Organooxygen comp   | 72231  | 41719  | 83826  | 0      | 0      | 66598  | 28404  | 3405   | 20804  | 13359  | 33724  | 7786   |
| myo-Inositol              | Organooxygen comp   | 0      | 57011  | 49877  | 0      | 65152  | 87045  | 72022  | 55629  | 90164  | 137178 | 82068  | 80002  |
| Glyceric acid             | Organooxygen comp   | 42389  | 25217  | 68834  | 25906  | 53466  | 24884  | 50241  | 30256  | 34216  | 62386  | 18712  | 17404  |
| Stachyose                 | Organooxygen comp   | 29162  | 23943  | 16330  | 54121  | 31290  | 28769  | 12099  | 10032  | 0      | 13089  | 6393.9 | 4248.3 |
| 6-Phosphogluconic acid    | Organooxygen comp   | 17511  | 44757  | 24390  | 23217  | 31552  | 9019   | 7066.2 | 16942  | 22576  | 12498  | 15476  | 19660  |
| Mannose 6-phosphate       | Organooxygen comp   | 26067  | 11721  | 7012.9 | 30735  | 21370  | 11992  | 13476  | 13606  | 7125.8 | 9411.9 | 30153  | 10616  |
| Pseudouridine 5'-phosphat | Organooxygen comp   | 47076  | 3876.5 | 1791   | 46222  | 2108.8 | 1507.3 | 5124.7 | 17804  | 1581   | 38297  | 2729.5 | 3643.1 |
| Streptozotocin            | Organooxygen comp   | 5594   | 21828  | 3967.7 | 14255  | 0      | 19733  | 53969  | 56742  | 49113  | 9565.7 | 2269.4 | 6117.4 |
| 1-(alpha-Methyl-4-(2-meth | Organooxygen comp   | 10954  | 7628.9 | 8627.5 | 1537.1 | 13230  | 3027.2 | 12014  | 6509.9 | 7104   | 30558  | 4300.9 | 13224  |
| Fructose 1,6-bisphosphate | Organooxygen comp   | 3219.6 | 5805.4 | 7764.3 | 3488.1 | 10608  | 11587  | 2194.8 | 1141.2 | 1587.9 | 2226.1 | 3258.5 | 2406.3 |
| 4-O-alpha-D-Galactopyran  | Organooxygen comp   | 4520.3 | 2764.7 | 6214.2 | 8037.7 | 9411.1 | 5959.7 | 6638.6 | 36252  | 4294.5 | 40697  | 16210  | 5591.4 |
| Quinic acid               | Organooxygen comp   | 4039.7 | 4917.2 | 5396.7 | 6440.4 | 6089.7 | 7652.1 | 6465.9 | 7430.6 | 9010.1 | 4267.6 | 5921.1 | 9291.3 |
| Beta-D-Glucose            | Organooxygen comp   | 5301.7 | 2165.6 | 2145.6 | 1319.3 | 2092   | 1468.2 | 1840.3 | 1228   | 493.78 | 3879.7 | 2417.9 | 1516   |
| Benzoyl glucuronide (Ben  | Organooxygen comp   | 4864   | 2584.3 | 0      | 0      | 3081.9 | 0      | 14372  | 0      | 3915.8 | 0      | 0      | 0      |
| Streptomycin              | Organooxygen comp   | 492.18 | 0      | 0      | 2027.6 | 2372.6 | 5424.5 | 3022.9 | 3700.6 | 0      | 1421.8 | 5095.5 | 0      |
| Galactinol                | Organooxygen comp   | 1006.1 | 1031.7 | 323.45 | 1359.1 | 2950.7 | 673.13 | 1784.7 | 5993.3 | 2711.9 | 3945.9 | 2454.3 | 681.5  |
| Raffinose                 | Organooxygen comp   | 0      | 0      | 0      | 0      | 6060.8 | 0      | 0      | 0      | 0      | 0      | 0      | 0      |
| Phendimetrazine           | Oxazinanes          | 13923  | 11516  | 9741.1 | 11508  | 25886  | 18444  | 10530  | 11478  | 14518  | 19561  | 15010  | 20317  |
| Oxymorphone               | Phenanthrenes and d | 74773  | 92377  | 140399 | 121452 | 97080  | 120096 | 110463 | 246122 | 64002  | 128623 | 128320 | 142453 |
| Trimethoprim              | Phenol ethers       | 8E+06  | 6E+06  | 7E+06  | 5E+06  | 6E+06  | 2E+07  | 59433  | 223378 | 79776  | 78606  | 68113  | 86194  |
| Venlafaxine               | Phenol ethers       | 4896.6 | 1379.9 | 1415.9 | 1784.4 | 2614.9 | 1695.3 | 3631.5 | 2938.2 | 1262.1 | 1331   | 2323.4 | 662.04 |
| N-p-Coumaroyl putrescine  | Phenolamides        | 7091   | 8407.6 | 3637.5 | 4115.8 | 6657   | 4761.5 | 2273.7 | 2631.1 | 3947   | 5737.4 | 3554.3 | 5995.6 |
| N-Feruloyl putrescine     | Phenolamides        | 1047   | 753.03 | 2840.8 | 1519.3 | 1847.5 | 2760.5 | 19072  | 73790  | 15873  | 61125  | 75892  | 39593  |
| 3,4-Dihydroxybenzaldehy   | Phenols             | 1E+07  | 9E+06  | 1E+07  | 1E+07  | 1E+07  | 1E+07  | 32377  | 124735 | 46963  | 13394  | 21937  | 28455  |
| p-Octopamine              | Phenols             | 8E+06  | 8E+06  | 7E+06  | 8E+06  | 8E+06  | 7E+06  | 7E+06  | 6E+06  | 8E+06  | 6E+06  | 7E+06  | 7E+06  |
| Phloretic acid            | Phenols             | 3E+06  | 8E+06  | 4E+06  | 9E+06  | 931399 | 115705 | 84571  | 119184 | 62339  | 118233 | 108906 | 74893  |
| 4-Hydroxybenzaldehyde     | Phenols             | 3E+06  | 3E+06  | 87624  | 2E+06  | 1E+06  | 593311 | 600393 | 896445 | 522993 | 926211 | 619214 | 514871 |
| 2,5-Dihydroxybenzaldehy   | Phenols             | 1E+06  | 1E+06  | 2E+06  | 998579 | 991490 | 2E+06  | 17799  | 53133  | 22822  | 26719  | 34111  | 26711  |
| Benzaldehyde              | Phenols             | 688391 | 2E+06  | 902033 | 2E+06  | 232038 | 137886 | 127857 | 91917  | 185859 | 79000  | 75261  | 79577  |
| 3-Ethyl-1,2-benzenediol   | Phenols             | 1E+06  | 783369 | 1E+06  | 1E+06  | 383092 | 448782 | 846303 | 989931 | 1E+06  | 1E+06  | 716843 | 665853 |
| Protocatechuic acid       | Phenols             | 104292 | 151468 | 242709 | 114912 | 68968  | 265409 | 17115  | 24399  | 20755  | 17085  | 17773  | 15012  |

|                          |         |        |        |        |        |        |        |        |        |        |        |        |        |
|--------------------------|---------|--------|--------|--------|--------|--------|--------|--------|--------|--------|--------|--------|--------|
| alpha-Tocopherol         | Phenols | 619142 | 36873  | 42508  | 138673 | 41805  | 33784  | 28642  | 166208 | 7712.6 | 8121.4 | 55858  | 72901  |
| Syringic acid            | Phenols | 172073 | 155906 | 42464  | 160008 | 61456  | 12336  | 16621  | 38690  | 18109  | 80374  | 18905  | 46261  |
| 1,2-Dimethoxybenzene     | Phenols | 89781  | 59657  | 125569 | 114687 | 46083  | 117916 | 98421  | 97419  | 76722  | 143816 | 80922  | 81306  |
| Moracin C                | Phenols | 94246  | 96610  | 118478 | 88056  | 63644  | 52265  | 239412 | 141181 | 121034 | 98879  | 127090 | 82155  |
| Altholactone             | Phenols | 51558  | 41749  | 81597  | 53212  | 6381   | 65550  | 9997   | 7277.9 | 7693.4 | 7205.9 | 9812.5 | 7143.6 |
| Ethyl orsellinate        | Phenols | 44347  | 57558  | 47549  | 44660  | 61274  | 38759  | 54095  | 52035  | 57072  | 42157  | 37072  | 64617  |
| 3-Hydroxyphenylacetic ac | Phenols | 88395  | 28985  | 60587  | 24194  | 26956  | 46823  | 43541  | 32180  | 12026  | 40166  | 20735  | 22683  |
| Dihydromethysticin       | Phenols | 68043  | 28858  | 12009  | 51100  | 5363.9 | 33684  | 304182 | 483058 | 367712 | 88235  | 752369 | 212225 |
| 4-Hydroxybenzoic acid    | Phenols | 26688  | 21940  | 35570  | 13948  | 23689  | 53102  | 55203  | 23381  | 48010  | 52365  | 28059  | 40772  |
| 3,4-Dihydroxymandelic ac | Phenols | 28092  | 28772  | 27852  | 33634  | 24802  | 27241  | 33166  | 36966  | 25747  | 28923  | 25409  | 33173  |
| Dihydrokavain            | Phenols | 17748  | 23181  | 32694  | 26108  | 20417  | 38008  | 2089.8 | 7292.1 | 6388.5 | 3301.1 | 10110  | 8420.6 |
| Demethoxyencecalin       | Phenols | 21138  | 13605  | 51672  | 40193  | 12660  | 16117  | 26200  | 22217  | 28439  | 22634  | 22413  | 21884  |
| Octyl Gallate            | Phenols | 20100  | 15191  | 29080  | 33452  | 31619  | 18569  | 35110  | 34859  | 21906  | 6086.3 | 38181  | 24679  |
| 4-Hydroxy-3-methoxyman   | Phenols | 4433.2 | 43238  | 13809  | 13423  | 18181  | 35472  | 131250 | 128308 | 80336  | 112943 | 143418 | 118854 |
| Chavicol                 | Phenols | 27858  | 17794  | 13266  | 24166  | 24220  | 20108  | 22950  | 30024  | 28444  | 27907  | 20221  | 24453  |
| 7-(4-Hydroxyphenyl)-1-ph | Phenols | 19196  | 11878  | 10977  | 34438  | 9964.5 | 19634  | 18869  | 59553  | 16273  | 9172.7 | 25540  | 15869  |
| 3-Ethoxy-4-hydroxybenzal | Phenols | 15594  | 19391  | 14891  | 14265  | 19518  | 11818  | 7990.2 | 21046  | 9610.9 | 12681  | 20819  | 27759  |
| 4-Methylcatechol         | Phenols | 25081  | 11466  | 7696.7 | 13371  | 14418  | 21478  | 0      | 588.91 | 586.75 | 563.77 | 0      | 1207.9 |
| 2-(4-Hydroxyphenyl)ethan | Phenols | 14744  | 12437  | 17559  | 16873  | 10077  | 14342  | 21674  | 101266 | 12923  | 9759.4 | 56964  | 55515  |
| Benzyl acetate           | Phenols | 25208  | 16942  | 18809  | 15104  | 0      | 9177.5 | 15349  | 5926.2 | 16260  | 10514  | 21002  | 14782  |
| 2,4-Dimethylphenol       | Phenols | 19449  | 15747  | 12730  | 13915  | 10609  | 12163  | 12160  | 12443  | 18879  | 9390.1 | 6953.4 | 12590  |
| Broussonin C             | Phenols | 23987  | 12304  | 7663   | 4642.4 | 20063  | 15354  | 23838  | 22407  | 11101  | 10743  | 21641  | 2689.1 |
| Methyl gallate           | Phenols | 4939.7 | 14802  | 5887.8 | 33814  | 6832.6 | 8387.4 | 95187  | 88129  | 114302 | 108968 | 47696  | 97198  |
| 1-Dehydro-6-gingerdione  | Phenols | 13645  | 8706.3 | 10689  | 5094.6 | 5215.9 | 30276  | 388.33 | 0      | 392.99 | 0      | 0      | 0      |
| Yangonin                 | Phenols | 16932  | 13483  | 17766  | 7803   | 11356  | 5951.7 | 10050  | 7948.7 | 6915.6 | 9007.8 | 28482  | 3501   |
| Propyl paraben           | Phenols | 21337  | 8048.8 | 8154.1 | 11264  | 14016  | 8178.4 | 8394.5 | 6862   | 10021  | 12234  | 8289.1 | 7103.6 |
| Precocene II             | Phenols | 9595.1 | 6815.5 | 10012  | 22945  | 13431  | 8017.1 | 13846  | 12839  | 4254.2 | 4446.9 | 17609  | 7694.4 |
| Mulberrofuran Q          | Phenols | 8668.9 | 2968.5 | 20558  | 5107.2 | 26609  | 4603.8 | 13665  | 13295  | 2289.9 | 13161  | 13714  | 8061.2 |
| 6-Gingerol               | Phenols | 17299  | 6987.1 | 8945.7 | 9190.2 | 13702  | 8664.1 | 275406 | 984842 | 279800 | 346232 | 1E+06  | 226271 |
| Guaiacol                 | Phenols | 6085.1 | 7828.2 | 5457.3 | 2997.9 | 4194   | 31434  | 8352   | 7112.6 | 4425.3 | 6508.2 | 7136.2 | 7628.1 |
| Beta-Tocopherol          | Phenols | 6454.2 | 9165   | 6567   | 7009.2 | 15663  | 11676  | 9585.5 | 9401   | 12254  | 5960.7 | 15004  | 4325.7 |
| Sesamol                  | Phenols | 8680.6 | 8468   | 6100.9 | 11867  | 7376.7 | 12517  | 5566.6 | 5460   | 7699.8 | 2488   | 6391.6 | 3392.5 |

|                            |         |        |        |        |        |        |        |        |        |        |        |        |        |
|----------------------------|---------|--------|--------|--------|--------|--------|--------|--------|--------|--------|--------|--------|--------|
| 4-Isopropylbenzaldehyde    | Phenols | 8697.7 | 6623   | 3482   | 15438  | 11182  | 9145.4 | 9082.5 | 16905  | 12367  | 18330  | 10558  | 18935  |
| Acetovanillone             | Phenols | 7954.5 | 5357.5 | 7268.8 | 15381  | 5474.2 | 11274  | 8573.3 | 9225.4 | 4871.3 | 5395.7 | 8300   | 6512.5 |
| 3-Hydroxybenzoic acid      | Phenols | 3937.9 | 6738.6 | 7766.3 | 14450  | 6106.6 | 13049  | 11686  | 10029  | 8444.4 | 7212.2 | 6717.2 | 9518.5 |
| 1'-Acetoxychavicol acetate | Phenols | 18215  | 5953.7 | 4662.6 | 9733.9 | 5795.2 | 7001.3 | 8191.8 | 5473.7 | 8072.6 | 8159.6 | 2478   | 5446.5 |
| Kakuol                     | Phenols | 5631.5 | 9415.3 | 10822  | 12520  | 3183.4 | 6204.7 | 8428.7 | 6433.7 | 3816.6 | 5274.4 | 11435  | 10459  |
| Orsellinic acid            | Phenols | 26784  | 619.88 | 605.73 | 1215.1 | 16753  | 1202.3 | 655.18 | 0      | 2682.7 | 0      | 594.4  | 0      |
| Ginkgolic acid C17:1       | Phenols | 0      | 0      | 9786.5 | 12560  | 24731  | 0      | 0      | 0      | 0      | 0      | 0      | 0      |
| Vanillic acid              | Phenols | 3142.2 | 6039.7 | 5608.6 | 8758.9 | 14500  | 8830.9 | 149880 | 202061 | 159240 | 235105 | 179121 | 208273 |
| Cinnamyl acetat            | Phenols | 6403.1 | 11769  | 8485.7 | 6498.3 | 9859.2 | 3851.5 | 7902.1 | 6365.6 | 6472.2 | 7696.8 | 10575  | 10501  |
| Zingerone                  | Phenols | 4726.7 | 2445.2 | 5509.1 | 10747  | 6780   | 10911  | 5441.2 | 4483.9 | 21743  | 7692.9 | 3858.6 | 3459.5 |
| Encecalin                  | Phenols | 10419  | 8123.7 | 5095.7 | 7333.8 | 4562.9 | 4677.7 | 7336.8 | 10360  | 3266.3 | 4982.1 | 11893  | 7682.6 |
| 4'-Prenyloxyresveratrol    | Phenols | 3358.1 | 4920   | 5397.5 | 7995.3 | 5516.6 | 11978  | 12156  | 8609.6 | 5368.9 | 7242.2 | 31841  | 6953.9 |
| 1-Phenylethanol            | Phenols | 5951.1 | 9988.4 | 8355.8 | 3298.5 | 5818.3 | 5581.7 | 5460.3 | 6979.5 | 7099.3 | 6751.6 | 3258   | 6597   |
| Resorcinol                 | Phenols | 589.24 | 601.4  | 18582  | 15357  | 905.09 | 586.91 | 4135.9 | 1194.3 | 1815.2 | 1192.6 | 1226.1 | 2447.9 |
| 10-Gingerol                | Phenols | 11173  | 4875.3 | 0      | 9647.5 | 2646.8 | 7846   | 11658  | 5095.5 | 2984.7 | 4985   | 4502   | 3381.2 |
| Oleocanthal                | Phenols | 6508   | 4875.3 | 3197.9 | 10902  | 3947   | 6384.9 | 7942   | 10059  | 10144  | 3008.2 | 7119.9 | 13582  |
| Cannabinol                 | Phenols | 6268.3 | 0      | 5765.6 | 7392.4 | 4581   | 11415  | 0      | 48725  | 17295  | 19302  | 0      | 34314  |
| Cardanol (C15:1)           | Phenols | 5285   | 3931.1 | 5723.6 | 8163   | 3691.6 | 6714.4 | 3966.1 | 5147.3 | 2293.6 | 1913.9 | 11350  | 6440.6 |
| p-Hydroxymandelic acid     | Phenols | 9386.9 | 4070.8 | 3688.7 | 4685.1 | 3967.6 | 6404.1 | 19054  | 23000  | 12942  | 29359  | 31841  | 6233.4 |
| N-(p-Hydroxyphenethyl)ac   | Phenols | 4045.4 | 4992   | 2692.8 | 7510.2 | 3966.2 | 6292.4 | 2974.2 | 4269.2 | 2896.8 | 3019.4 | 3125.9 | 3354.3 |
| Piceatannol                | Phenols | 2981.5 | 9750.3 | 1202.3 | 3029   | 8135.6 | 2883   | 1816.5 | 4082.3 | 5299.8 | 3308.8 | 4958   | 5044.6 |
| Oxyresveratrol             | Phenols | 4052.4 | 4895   | 5640.3 | 3756   | 3987.6 | 5132.2 | 4633.3 | 2757.4 | 5151   | 4701.3 | 5347.9 | 2195.5 |
| Altechromone A             | Phenols | 4074.6 | 5519.8 | 3818.1 | 3641.4 | 3191.6 | 4125.4 | 5931.7 | 3918.1 | 6319.3 | 8873   | 6479.7 | 2676   |
| beta-Glucogallin           | Phenols | 2811.5 | 2371.6 | 4019.6 | 1326.6 | 6359.3 | 5675.5 | 0      | 5092.3 | 1441.6 | 1898.4 | 1754.4 | 1900.9 |
| 4,4'-Methylenediphenol     | Phenols | 2748.4 | 8508.4 | 5364.8 | 1076.8 | 1726   | 2830.6 | 3143.3 | 7056.4 | 2218.4 | 2842.2 | 2814.7 | 2731.5 |
| Batatasin III              | Phenols | 2867.2 | 1755.4 | 3217   | 4057.7 | 6916.2 | 3323   | 5250   | 1842.5 | 4410.9 | 4701.3 | 3147.9 | 2560.5 |
| Ethyl 3,4,5-trimethoxyben  | Phenols | 4490.6 | 1583.5 | 4329.5 | 3864.5 | 3153.7 | 1458.2 | 2224.7 | 3426.9 | 2954.2 | 3853.6 | 6820.1 | 2315.7 |
| 5-Tricosyl-1,3-benzenedio  | Phenols | 4099.1 | 881.04 | 1315.1 | 6800.8 | 3369.7 | 1604.6 | 6072.6 | 4277.6 | 3162.3 | 2280.4 | 7048.4 | 2467.6 |
| DL-alpha-Tocopherylacetate | Phenols | 2845.3 | 781.06 | 202.18 | 5974.1 | 8103.4 | 0      | 2447   | 1885   | 1392.2 | 2169.3 | 1801.6 | 1173.1 |
| Taxiphyllin                | Phenols | 3874.1 | 1668.7 | 1671.9 | 3066.2 | 2406.6 | 1341.3 | 1758.8 | 4808   | 1349.1 | 1352.8 | 5522.6 | 2199   |
| Metanephrene               | Phenols | 2310.2 | 3833.6 | 1367.6 | 1891.4 | 1360.8 | 1177.6 | 4032.1 | 4003   | 958.19 | 1256.6 | 1163.7 | 1338.4 |
| Methyl orsellinate         | Phenols | 1356.1 | 1513.2 | 2426.9 | 1444.5 | 2391.8 | 2037   | 1346.9 | 1521.5 | 1070.4 | 1371.7 | 2560.5 | 2325.2 |

|                          |                     |        |        |        |        |        |        |        |        |        |        |        |        |
|--------------------------|---------------------|--------|--------|--------|--------|--------|--------|--------|--------|--------|--------|--------|--------|
| Tetrahydrocurcumin       | Phenols             | 931.09 | 624.83 | 216.63 | 1236.8 | 214.55 | 1033.3 | 1418.2 | 1860.3 | 1304.8 | 3263.3 | 1668.9 | 3089.9 |
| Moracin O                | Phenols             | 0      | 822.9  | 770.26 | 407.58 | 1119   | 665.34 | 1555.4 | 1767.5 | 2490.9 | 1214.6 | 1824.9 | 1601.4 |
| Hamamelitannin           | Phenols             | 0      | 0      | 0      | 0      | 0      | 0      | 725.61 | 0      | 0      | 3475.6 | 8633.5 | 0      |
| 4-Hydroxyphenyl-2-propic | Phenylpropanoic aci | 7479.7 | 4696.2 | 6541.2 | 8678.6 | 23716  | 13713  | 6628.1 | 7813.5 | 10490  | 12992  | 9816.5 | 6940.9 |
| Ethyl cinnamate          | Phenylpropanoids    | 36659  | 39306  | 62934  | 16788  | 14099  | 31888  | 2947.9 | 13031  | 16555  | 8842.6 | 10743  | 7900.1 |
| Caffeic acid             | Phenylpropanoids    | 33136  | 29494  | 39117  | 25992  | 27461  | 33587  | 3797.9 | 3417.7 | 2826.7 | 4999.5 | 2954.4 | 1614   |
| 3-Methoxy-4,5-methylene  | Phenylpropanoids    | 14180  | 40797  | 39985  | 23105  | 36996  | 30263  | 25801  | 25461  | 31353  | 47308  | 50755  | 24029  |
| Methyl cinnamate         | Phenylpropanoids    | 9431.8 | 16880  | 21430  | 25773  | 35727  | 30098  | 27021  | 56531  | 21089  | 49831  | 35444  | 24447  |
| 3,4,5-Trimethoxycinnamyl | Phenylpropanoids    | 28594  | 20197  | 28832  | 19240  | 17409  | 14625  | 9996   | 14472  | 19226  | 26169  | 30828  | 15929  |
| Coniferylaldehyde        | Phenylpropanoids    | 22390  | 9466.8 | 12033  | 15010  | 12042  | 27239  | 32778  | 58034  | 25698  | 32934  | 31605  | 25311  |
| Ferulic acid             | Phenylpropanoids    | 13804  | 9832.7 | 10637  | 17676  | 11534  | 20515  | 46776  | 63711  | 38469  | 6979.8 | 4387.8 | 6204.6 |
| 3-(4-Hydroxyphenyl)-1-pr | Phenylpropanoids    | 12223  | 10531  | 5817.3 | 16163  | 11441  | 20154  | 9578.7 | 8054.4 | 7102.6 | 5320.1 | 4222.8 | 7598.3 |
| 1-(4-Hydroxyphenyl)prop  | Phenylpropanoids    | 11360  | 7788.3 | 8027   | 11120  | 20678  | 9937   | 14909  | 13189  | 5800.5 | 7724.2 | 13340  | 7142.8 |
| Trans-caffeic acid       | Phenylpropanoids    | 8248.2 | 16468  | 15836  | 7416.5 | 6996.4 | 9371.1 | 7090.7 | 25760  | 4169.2 | 10403  | 24088  | 6986.4 |
| Cinnamic acid            | Phenylpropanoids    | 2349.9 | 15784  | 17016  | 15617  | 3782.8 | 4997.1 | 6103   | 1618.9 | 2894.9 | 2183.1 | 2675.7 | 2628.8 |
| Hydrocinnamic acid       | Phenylpropanoids    | 7516.6 | 9298.2 | 8093.5 | 5815.5 | 11928  | 11313  | 10306  | 4330.2 | 7583.8 | 17737  | 7318.5 | 7379   |
| Osthol                   | Phenylpropanoids    | 14330  | 7957.5 | 3845.8 | 5108.9 | 7794.6 | 10149  | 7951.3 | 9295.7 | 8683.5 | 12341  | 13071  | 6407.4 |
| Angelicin                | Phenylpropanoids    | 10202  | 4165.6 | 5906.1 | 6024.5 | 11133  | 9540.3 | 10902  | 9909.2 | 9935.8 | 5160   | 6481.5 | 5593.7 |
| trans-3,5-Dimethoxy-4-hy | Phenylpropanoids    | 4429.3 | 10355  | 10276  | 4977.4 | 8406   | 6859.5 | 9526.6 | 12994  | 16975  | 6628.5 | 12245  | 6952.7 |
| Cinnamyl alcohol         | Phenylpropanoids    | 6843.8 | 6417.5 | 10851  | 3312.3 | 5722.3 | 2350.1 | 10258  | 14406  | 10361  | 10761  | 4277.6 | 7548.8 |
| Dihydroconiferyl alcohol | Phenylpropanoids    | 6216.5 | 6265.6 | 2217.4 | 4910.5 | 8753.3 | 2023.7 | 9357   | 3977.9 | 5551.2 | 5724.7 | 2060.5 | 5317.9 |
| Cinnamyl cinnamate       | Phenylpropanoids    | 3086.6 | 3011.4 | 2224.7 | 2374   | 5293.1 | 13118  | 85084  | 435723 | 82314  | 346796 | 424562 | 189201 |
| 2-Hydroxycinnamic acid   | Phenylpropanoids    | 7177.1 | 2775.2 | 2566.6 | 4638.1 | 9221.8 | 2542.7 | 4972.7 | 5518.2 | 9686.1 | 10853  | 5972.9 | 6134.6 |
| 3-Hydroxy-4-methoxycinn  | Phenylpropanoids    | 5929.1 | 3960.3 | 4840.9 | 2296.6 | 3420.5 | 7355.9 | 26259  | 7889.1 | 15094  | 3944.4 | 2823.4 | 7259.2 |
| Benzyl cinnamate         | Phenylpropanoids    | 3919.9 | 1742.2 | 3007.4 | 4592.3 | 6349.4 | 7596.6 | 6442.2 | 3517.8 | 2268.9 | 3503   | 4388.5 | 6245.6 |
| Coniferyl alcohol        | Phenylpropanoids    | 2996.9 | 12099  | 1935   | 1593.5 | 4132.9 | 2213.7 | 4466.4 | 3479.1 | 23896  | 1077.6 | 710.22 | 1948.3 |
| Isofraxidin              | Phenylpropanoids    | 3028   | 2247.2 | 4840.8 | 3786.3 | 3049.9 | 5182.3 | 4159.1 | 4686.6 | 4862.9 | 5481.1 | 3725.2 | 2272.6 |
| Imperatorin              | Phenylpropanoids    | 5832   | 3446.2 | 1523.3 | 4335.5 | 4094.9 | 2567.7 | 2517   | 2689.2 | 2048.2 | 0      | 1476.7 | 1063.9 |
| Echinacoside             | Phenylpropanoids    | 2641.9 | 6193.2 | 3474.4 | 2632.2 | 2722.9 | 3398.3 | 209.63 | 215.59 | 0      | 0      | 0      | 417.48 |
| 4-Methoxycinnamaldehyd   | Phenylpropanoids    | 4919.6 | 2572.9 | 1617.5 | 3865   | 3458.4 | 4626.4 | 2589.9 | 1199.9 | 776    | 2616.4 | 2396.6 | 3198.7 |
| C-Veratroylglycol        | Phenylpropanoids    | 2376.3 | 3021.4 | 5661.5 | 2140.2 | 3548.7 | 3191.7 | 3378.3 | 14403  | 3482.4 | 4448.8 | 6710.5 | 8250.5 |
| Xanthotoxol              | Phenylpropanoids    | 1627.5 | 2200.1 | 4515.2 | 3977.1 | 4086   | 2954.3 | 5220   | 2743.1 | 6974.9 | 1120.9 | 5320.9 | 2062.9 |

|                                    |                            |        |        |        |        |        |        |        |        |        |        |        |        |
|------------------------------------|----------------------------|--------|--------|--------|--------|--------|--------|--------|--------|--------|--------|--------|--------|
| 3,4-Dimethoxycinnamic acid         | Phenylpropanoids           | 3628.3 | 4007.9 | 2709.3 | 2623.2 | 3217.4 | 2265.6 | 2087   | 3745.7 | 2619.2 | 3043.6 | 3203.7 | 3383.1 |
| Magnolol                           | Phenylpropanoids           | 3372.8 | 1964.6 | 2195.3 | 3155.4 | 1319.8 | 1129   | 2448.9 | 3004.4 | 2908.4 | 2597.2 | 1649.3 | 3143.5 |
| Syringin                           | Phenylpropanoids           | 1048.4 | 1047.8 | 1059.1 | 0      | 6456.5 | 2737.8 | 1092.6 | 1054.9 | 3020.4 | 1944.9 | 0      | 1055.9 |
| 5-O-Caffeoylshikimic acid          | Phenylpropanoids           | 1207.6 | 1609.9 | 655.67 | 1085   | 1379.1 | 4219.3 | 1855.2 | 1548.2 | 2413.8 | 906.16 | 1139.9 | 1836.4 |
| Phillyrin                          | Phenylpropanoids           | 931    | 238.11 | 483.97 | 741.53 | 1086.5 | 3457.5 | 966.42 | 1742.3 | 5491.5 | 4266.5 | 1000.2 | 1702.1 |
| 1-Aminocyclopropanecarboxaldehyde  | phytohormone               | 66482  | 54508  | 580612 | 77559  | 68853  | 1E+06  | 12166  | 25870  | 7237.1 | 408986 | 13469  | 325317 |
| trans-Zeatin-riboside              | phytohormone               | 1753.5 | 63099  | 197351 | 70520  | 10094  | 2226.9 | 4706.6 | 2156.6 | 15118  | 7952.6 | 6726.1 | 3455   |
| Indole-3-carboxaldehyde            | phytohormone               | 19938  | 15358  | 28138  | 38599  | 32503  | 20638  | 47692  | 38970  | 34608  | 54021  | 31914  | 54872  |
| N6-(delta 2-Isopentenyl)-adenosine | phytohormone               | 7986.2 | 8852.6 | 60004  | 17906  | 49807  | 4873.7 | 7359.9 | 6044.5 | 6836.8 | 2915.8 | 3622.9 | 10174  |
| 3-Indolebutyric acid               | phytohormone               | 18088  | 26612  | 21319  | 30876  | 14175  | 18778  | 19560  | 13460  | 10256  | 17243  | 6335.9 | 19854  |
| Indole-3-acetic acid               | phytohormone               | 17005  | 19056  | 11638  | 16931  | 27191  | 0      | 17702  | 20653  | 19080  | 21613  | 16990  | 15744  |
| trans-Zeatin                       | phytohormone               | 4388   | 4949.7 | 59589  | 5963   | 2083.1 | 5051.9 | 3187.8 | 2393.2 | 4348.3 | 6138.8 | 4366.3 | 4223.8 |
| (±)-Jasmonic acid                  | phytohormone               | 27083  | 3607.1 | 12838  | 24816  | 4912.3 | 7755.8 | 2566.4 | 2891.8 | 334.72 | 7909.8 | 1896.7 | 1170.5 |
| cis-Zeatin                         | phytohormone               | 4058.7 | 5795.6 | 22345  | 5963   | 7713.2 | 4643   | 3187.8 | 6647.9 | 2769.3 | 11281  | 4916.4 | 6495.1 |
| N-((-)-jasmonoyl)-S-isoleucine     | phytohormone               | 12452  | 584.15 | 5309.8 | 10955  | 6061.4 | 5385.9 | 1105.3 | 541.06 | 580.51 | 578.26 | 640.96 | 309.6  |
| Gibberellin A7                     | phytohormone               | 2264.5 | 5351   | 2496.8 | 2677   | 2683.3 | 1206   | 3380.3 | 1349.2 | 1796.1 | 1697   | 2358   | 3724.3 |
| Gibberellin A4                     | phytohormone               | 1678   | 1307.5 | 1682.1 | 2757.7 | 3431.5 | 3091.5 | 1207.5 | 1642.1 | 2338.4 | 793.37 | 1845.3 | 2297   |
| (+)-Absciscic acid                 | phytohormone               | 796.66 | 0      | 1151.6 | 0      | 234.9  | 10132  | 1166.5 | 0      | 1171.7 | 4233.5 | 2407.8 | 0      |
| 1-Naphthylacetic acid              | Phytohormones              | 8647.5 | 4260.1 | 6009.5 | 8859.1 | 15120  | 4701.9 | 9028.9 | 4656.3 | 7401.5 | 17891  | 9635.1 | 13942  |
| alpha-Irone                        | Prenol lipids              | 68524  | 76826  | 59003  | 39412  | 72509  | 186232 | 17830  | 10001  | 19313  | 9906.3 | 19260  | 9352.9 |
| (R)-Menthofuran                    | Prenol lipids              | 70675  | 79489  | 73078  | 72111  | 77819  | 83962  | 13959  | 10039  | 11923  | 24186  | 26769  | 7522.5 |
| beta-Ionone                        | Prenol lipids              | 14544  | 13209  | 9824.4 | 6587.1 | 13811  | 5743.3 | 11642  | 8532   | 9234.4 | 11358  | 15176  | 26433  |
| Capsidiol                          | Prenol lipids              | 6763.9 | 9980.3 | 10642  | 12902  | 5024.6 | 9708.6 | 11535  | 3849.9 | 3769.1 | 13397  | 6189.6 | 10162  |
| 4-Isopropylbenzoic acid            | Prenol lipids              | 9933.2 | 5277.1 | 8636.3 | 9053.3 | 10095  | 2827.5 | 10100  | 13029  | 6201.2 | 6019.3 | 16782  | 5766.3 |
| Lactaroviolin                      | Prenol lipids              | 2386.7 | 2353.4 | 1138.4 | 1221.3 | 5081.5 | 8754.7 | 1821.5 | 2342.7 | 3530   | 2950   | 8549.9 | 1196.9 |
| Piperitenone                       | Prenol lipids              | 4794   | 3617.4 | 1980.4 | 1426   | 3445.4 | 4418.4 | 2592.4 | 3723.4 | 2978.6 | 9284   | 3229.5 | 2515.3 |
| alpha-Cyperol                      | Prenol lipids              | 649.35 | 4686.4 | 1173.6 | 1279.3 | 0      | 3747   | 2863.7 | 1249.6 | 3935.9 | 2865   | 1745   | 0      |
| Isoxanthopterin                    | Pteridines and derivatives | 6688   | 5667.7 | 7280.9 | 4487.5 | 7532.8 | 3396.6 | 5064.8 | 5063.5 | 14309  | 11484  | 6686.1 | 6305.1 |
| Vidarabine                         | Purine nucleosides         | 1E+06  | 675071 | 541878 | 2E+06  | 1E+06  | 243099 | 3E+06  | 5E+06  | 8E+06  | 2E+06  | 1E+07  | 3E+06  |
| 2'-O-Methyladenosine               | Purine nucleosides         | 12373  | 0      | 20455  | 16134  | 32665  | 11238  | 9937.1 | 26527  | 6815.1 | 8904.2 | 16268  | 2428.4 |
| Adenosine 2',3'-cyclic phosphate   | Purine nucleotides         | 451.09 | 2359.5 | 461.48 | 3349.1 | 3186.6 | 1667.5 | 3098.3 | 3541.3 | 3974.3 | 489.6  | 3331.9 | 1101   |
| 3-Hydroxypicolinic acid            | Pyridines and derivatives  | 14038  | 183435 | 11959  | 12092  | 7092.8 | 14108  | 5882.1 | 9513.1 | 5330.7 | 3947.4 | 3086.4 | 12282  |

|                                                    |                            |        |        |        |        |        |        |        |        |        |        |        |        |
|----------------------------------------------------|----------------------------|--------|--------|--------|--------|--------|--------|--------|--------|--------|--------|--------|--------|
| 5-(3-Pyridyl)-2-hydroxytetrahydro-2H-pyridine      | Pyridines and derivatives  | 23623  | 57662  | 35963  | 84539  | 7379.2 | 3463.7 | 3248.4 | 2014   | 1035.2 | 3441.6 | 350.89 | 2134.2 |
| 3-Carbamyl-1-methylpyridine                        | Pyridines and derivatives  | 20287  | 9490.9 | 21170  | 17907  | 30670  | 23836  | 26583  | 92950  | 50169  | 49726  | 57762  | 47735  |
| N1-Methyl-4-pyridone-3-carboxamide                 | Pyridines and derivatives  | 7040.2 | 4846.5 | 10186  | 14471  | 3805.2 | 6204   | 3253.4 | 19208  | 3603.1 | 0      | 951.18 | 9236.1 |
| 4-Pyridoxolactone                                  | Pyridines and derivatives  | 9849.5 | 7363.1 | 4779.3 | 4815.1 | 6806.9 | 6340.7 | 10298  | 6093.3 | 5424.4 | 6022.5 | 8804.3 | 8286.3 |
| Isonicotinic acid                                  | Pyridines and derivatives  | 5603.4 | 2624.9 | 5060.3 | 4867.5 | 6911.4 | 13887  | 13141  | 2830.6 | 3613.9 | 4893.6 | 10665  | 6993.7 |
| (S)-Actinidine                                     | Pyridines and derivatives  | 5371.8 | 6112.1 | 5908.5 | 4841.8 | 4218.4 | 5777.6 | 5370.2 | 5883.7 | 5628.9 | 13474  | 8123.4 | 2982.2 |
| gamma-Hydroxy-3-pyridinecarboxaldehyde             | Pyridines and derivatives  | 3763.6 | 4324   | 5780.3 | 1875.6 | 2478.4 | 5610.8 | 764.46 | 1838.5 | 1310.1 | 2087.2 | 1055.9 | 2408.2 |
| N1-Methyl-2-pyridone-5-carboxamide                 | Pyridines and derivatives  | 5740.1 | 2993.4 | 4365.4 | 2763.8 | 3259.5 | 2917.4 | 3113.3 | 4196.9 | 687.64 | 1373.8 | 1582.1 | 1190.8 |
| Pyridoxal 5'-phosphate                             | Pyridines and derivatives  | 2041.2 | 871.28 | 1957.6 | 1229.7 | 1155.1 | 887.61 | 662.33 | 877.4  | 1301.3 | 1775.6 | 1243.5 | 727.1  |
| Gemcitabine                                        | Pyrimidine nucleosides     | 327891 | 262292 | 349350 | 215102 | 351606 | 847322 | 393933 | 382914 | 243820 | 222965 | 358768 | 621679 |
| 5-Methyldeoxycytidine                              | Pyrimidine nucleosides     | 4899.4 | 2930.5 | 3488.9 | 4626.9 | 2279.5 | 2817.8 | 3256.6 | 667.08 | 2293   | 2516.7 | 3148.1 | 259.51 |
| dUMP                                               | Pyrimidine nucleotides     | 38406  | 25558  | 20103  | 7509.8 | 15221  | 32985  | 26625  | 41690  | 39362  | 23621  | 35575  | 21039  |
| Queuine                                            | Pyrrolopyrimidines         | 13878  | 7829.1 | 7514.8 | 6743   | 1385.6 | 3424.9 | 17975  | 8238.5 | 6856   | 14847  | 2863.8 | 2753.8 |
| D-(-)-Quinic acid                                  | Quinolines and derivatives | 6329.2 | 3605.1 | 6420.2 | 7116.5 | 2311.5 | 8337.1 | 5776.3 | 4273.6 | 4066.5 | 8098.1 | 4048.8 | 5063.4 |
| Xanthurenic acid                                   | Quinolines and derivatives | 2276.7 | 5874.8 | 4482.7 | 9464.1 | 2123.1 | 5002.4 | 6220.5 | 11269  | 3645.2 | 15979  | 4450.8 | 3547.6 |
| 1,2,5,6-Tetrahydro-4H-pyrido[4,3-b]pyrimidin-4-one | Quinolines and derivatives | 3027.3 | 5784   | 4471.8 | 6430.1 | 6368.4 | 2311.4 | 14591  | 7546.4 | 9864.2 | 4457.8 | 7255.5 | 5672.5 |
| Shikonin                                           | Quinones                   | 100466 | 92077  | 69103  | 143266 | 142247 | 110712 | 5220   | 5037.4 | 7549.5 | 1191.6 | 15012  | 1844.5 |
| 9-Methoxy-alpha-lapachone                          | Quinones                   | 40255  | 6694   | 26351  | 27726  | 63070  | 32695  | 1315.2 | 4096.9 | 2099.7 | 2465.5 | 2737.9 | 2210.2 |
| Aristolindiquinone                                 | Quinones                   | 29154  | 27668  | 32832  | 55528  | 13270  | 17445  | 30985  | 15014  | 39533  | 15857  | 8971.4 | 12624  |
| Juglone                                            | Quinones                   | 11446  | 9777.2 | 3791.6 | 5423.1 | 7032.6 | 16371  | 9816.4 | 10880  | 6985.2 | 11818  | 11317  | 6540.5 |
| Vitamin K1                                         | Quinones                   | 5299.9 | 2663.4 | 12459  | 24326  | 2167   | 2514.5 | 6260.3 | 15424  | 2153.3 | 3065.7 | 2383.4 | 1321.4 |
| Primin                                             | Quinones                   | 6308.4 | 6479.7 | 10736  | 7968.3 | 3501   | 2736.9 | 6645   | 7766.4 | 7773.8 | 9339.8 | 5997.4 | 9725.4 |
| Embelin                                            | Quinones                   | 218.05 | 973.43 | 222.59 | 5284.9 | 1035.6 | 638.83 | 429.19 | 294.85 | 282.02 | 91.476 | 364.85 | 370.38 |
| Artemisinin                                        | Sesquiterpenoids           | 121998 | 37839  | 74769  | 136842 | 138177 | 74690  | 75790  | 167286 | 61134  | 40552  | 65942  | 86329  |
| Picrotoxinin                                       | Sesquiterpenoids           | 36424  | 43083  | 26643  | 19554  | 32887  | 89790  | 0      | 2549.4 | 649.13 | 988.65 | 0      | 0      |
| trans-Caryophyllene                                | Sesquiterpenoids           | 32353  | 15824  | 53657  | 64269  | 41474  | 26794  | 57223  | 56315  | 37934  | 19963  | 52940  | 33055  |
| Caryophyllene oxide                                | Sesquiterpenoids           | 37107  | 37573  | 37813  | 19111  | 32231  | 24701  | 25649  | 33570  | 13489  | 17875  | 41802  | 23216  |
| Alpha-caryophyllene                                | Sesquiterpenoids           | 37698  | 18817  | 8943   | 22783  | 29039  | 24814  | 30962  | 17670  | 19969  | 10821  | 11141  | 16512  |
| alpha-Cyperone                                     | Sesquiterpenoids           | 35240  | 18650  | 9645.6 | 17449  | 18888  | 19921  | 14098  | 22700  | 13559  | 18126  | 21521  | 20449  |
| Curzerene                                          | Sesquiterpenoids           | 15707  | 18576  | 12618  | 13641  | 15036  | 22476  | 40937  | 57390  | 41491  | 52859  | 36037  | 33995  |
| Alantolactone                                      | Sesquiterpenoids           | 12077  | 15938  | 14665  | 16523  | 14139  | 7469.8 | 15841  | 23411  | 12128  | 17381  | 24532  | 12080  |
| 1beta-Hydroxyalantolactone                         | Sesquiterpenoids           | 9413.9 | 16001  | 11435  | 16979  | 6965.5 | 12594  | 1751.5 | 8527   | 0      | 2325.5 | 4658.7 | 3013.9 |



|                          |                      |        |        |        |        |        |        |        |        |        |        |        |        |
|--------------------------|----------------------|--------|--------|--------|--------|--------|--------|--------|--------|--------|--------|--------|--------|
| Valerenic acid           | Sesquiterpenoids     | 2962.3 | 9366.3 | 15307  | 21028  | 4885.3 | 10678  | 2586.5 | 6381.3 | 9270.3 | 5160   | 11281  | 12918  |
| Isoalantolactone         | Sesquiterpenoids     | 9686.7 | 5594.7 | 5652.1 | 16523  | 12108  | 13747  | 13702  | 11618  | 16480  | 9858.8 | 14388  | 5090.5 |
| Curcumol                 | Sesquiterpenoids     | 11245  | 7320.8 | 13386  | 7243.3 | 11448  | 10227  | 6940.8 | 4823   | 9428.5 | 5502   | 4949.3 | 4846.1 |
| Alpha-Santonin           | Sesquiterpenoids     | 3873   | 8423.3 | 10056  | 5566.1 | 5090.9 | 12336  | 4323.4 | 2022.8 | 2728.8 | 2136.8 | 6265.8 | 4697.6 |
| Xanthatin                | Sesquiterpenoids     | 8547.1 | 4393.9 | 6441   | 7959.9 | 4923.3 | 11093  | 3128.4 | 1735.7 | 3982.1 | 1928.3 | 2170.1 | 1695.5 |
| Curcolone                | Sesquiterpenoids     | 8547.1 | 4393.9 | 6441   | 7959.9 | 4923.3 | 11093  | 3128.4 | 1735.7 | 3982.1 | 1051.6 | 2170.1 | 1695.5 |
| Bisabolol oxide A        | Sesquiterpenoids     | 5550   | 4544.3 | 5904.8 | 4518.5 | 10066  | 8391.9 | 9422.6 | 8070.6 | 12242  | 12111  | 9391.8 | 7929   |
| Macrocarpal B            | Sesquiterpenoids     | 4760.3 | 4139.3 | 7192   | 3631   | 3047.1 | 6764.3 | 1223.6 | 3456   | 0      | 1775.2 | 3053.9 | 8426.3 |
| Catalpalactone           | Sesquiterpenoids     | 5349   | 2823.3 | 4298.5 | 3042.4 | 9675.8 | 1922.5 | 13959  | 8983.9 | 2063.3 | 7304.7 | 7147.9 | 2396.4 |
| Anisatin                 | Sesquiterpenoids     | 4177.8 | 0      | 6185.8 | 2207.6 | 2208.1 | 6256.3 | 5291.4 | 1660.9 | 0      | 5532.3 | 8480.8 | 12991  |
| Pyrocurzerenone          | Sesquiterpenoids     | 3961.6 | 3369.4 | 4351.3 | 3149.2 | 2415.5 | 2896.1 | 2868.9 | 2741.2 | 1814.5 | 2220.1 | 2718.8 | 3164   |
| Tenulin                  | Sesquiterpenoids     | 2762.9 | 3442.4 | 1130   | 3417.9 | 2633.9 | 1464.9 | 1036.7 | 2649.2 | 479.03 | 927.75 | 2176.8 | 1402   |
| Pterosin D               | Sesquiterpenoids     | 2843.4 | 2716.4 | 2452.9 | 3067.9 | 2133.1 | 478.85 | 993.36 | 2831.3 | 1763.8 | 3872   | 1469.8 | 1231.9 |
| Eupatolide               | Sesquiterpenoids     | 3329.1 | 1593.6 | 2029.5 | 2096.7 | 803.84 | 3408   | 512.17 | 499.71 | 498.07 | 1315.6 | 271.09 | 1142.1 |
| Lactupicrin              | Sesquiterpenoids     | 4439.6 | 1932.6 | 1080.5 | 3147.4 | 1055.9 | 1137.6 | 4503.9 | 1841.1 | 1315.4 | 726.4  | 2601.6 | 993.34 |
| Cryptomeridiol           | Sesquiterpenoids     | 488.43 | 1725.7 | 1013.8 | 2244.2 | 1785.7 | 1027.2 | 2020.7 | 3056.1 | 961.39 | 4533.1 | 2382.3 | 252.32 |
| Testosterone             | Steroids             | 57179  | 107202 | 92634  | 110042 | 76821  | 85945  | 6485.1 | 3541.3 | 2850.6 | 4873.7 | 1804.2 | 4400.9 |
| Estriol                  | Steroids             | 25195  | 13448  | 26244  | 12757  | 15250  | 19440  | 0      | 321.51 | 961.45 | 0      | 0      | 0      |
| Ursodeoxycholic acid     | Steroids             | 6577.1 | 8393   | 1747.2 | 9723.2 | 6310.5 | 10478  | 8478.2 | 5594   | 6375   | 8856   | 6566.8 | 4921.6 |
| Citrostadienol           | Steroids             | 4654.3 | 4204   | 7486.1 | 6598.1 | 3735.7 | 4954.7 | 11169  | 11103  | 11679  | 4152   | 12741  | 10901  |
| Lithocholic acid         | Steroids             | 3546.7 | 3174.3 | 4350.9 | 2278.4 | 4213.2 | 3164.3 | 4913.5 | 3132.7 | 5256.5 | 3328.7 | 5484.9 | 4554.9 |
| Bufotaline               | Steroids             | 1548.4 | 3404.9 | 0      | 5412.6 | 2365   | 4397   | 12764  | 0      | 788.54 | 11946  | 5123.4 | 1522.1 |
| Guggulsterone E&Z        | Steroids             | 1796.2 | 2304.1 | 1787   | 4593.9 | 2905.3 | 2933.9 | 2299.8 | 15730  | 4923   | 1795   | 4625.9 | 2333.4 |
| 6-Hydroxystigmasta-4,22- | Steroids             | 1816   | 3544.5 | 1800.2 | 1803   | 465.69 | 1156.6 | 3791.9 | 1378   | 621.38 | 934.48 | 1890.2 | 462.85 |
| Physalin C               | Steroids             | 0      | 0      | 0      | 2206.2 | 3415.1 | 786.63 | 0      | 1063.7 | 0      | 0      | 541.21 | 0      |
| Ergosterol peroxide      | Steroids and steroid | 8355.7 | 6129.1 | 57290  | 83154  | 5460.6 | 1437.4 | 7031.5 | 4745.5 | 23142  | 2532.1 | 8576   | 5700.8 |
| Dehydroepiandrosterone   | Steroids and steroid | 26738  | 29439  | 27434  | 25520  | 14544  | 29606  | 0      | 631.87 | 961.45 | 0      | 0      | 0      |
| Physalin D               | Steroids and steroid | 24134  | 6425.3 | 18067  | 18866  | 12167  | 29596  | 17464  | 33891  | 12783  | 31710  | 78954  | 15113  |
| alpha-Spinasterol        | Steroids and steroid | 13766  | 23002  | 4739.4 | 26164  | 25028  | 9947.9 | 25417  | 8960.7 | 8530.5 | 2319.1 | 10708  | 12967  |
| Exemestane               | Steroids and steroid | 8546.3 | 24885  | 24728  | 10821  | 10754  | 11534  | 16259  | 24159  | 18563  | 25728  | 37573  | 16100  |
| Oleaside A               | Steroids and steroid | 7403.7 | 10914  | 18796  | 5937.3 | 23678  | 16767  | 25389  | 13672  | 9156.7 | 14022  | 9449.4 | 18760  |
| Stigmasterol             | Steroids and steroid | 11379  | 24073  | 22110  | 3472.8 | 17837  | 2127.8 | 25417  | 8700.2 | 8530.5 | 3911.6 | 11954  | 7099   |

|                               |                      |        |        |        |        |        |        |        |        |        |        |        |        |
|-------------------------------|----------------------|--------|--------|--------|--------|--------|--------|--------|--------|--------|--------|--------|--------|
| Campesterol                   | Steroids and steroid | 17590  | 8950   | 17720  | 15286  | 13999  | 3757.3 | 27879  | 36887  | 8209.4 | 9465.7 | 28998  | 13090  |
| 7-Oxo-beta-sitosterol         | Steroids and steroid | 13493  | 10990  | 5717.7 | 7414.6 | 16962  | 15111  | 6334.5 | 8657.3 | 9610.5 | 5349.1 | 7911.7 | 7804.7 |
| Physalin G                    | Steroids and steroid | 9796.4 | 3634.1 | 3445.2 | 6496   | 22741  | 3885.8 | 3848.3 | 7908.2 | 4545.8 | 6585.5 | 8736.4 | 16303  |
| Beta-Sitosterol               | Steroids and steroid | 11977  | 4360.1 | 3703.6 | 16851  | 8497.5 | 4268.9 | 19111  | 28863  | 3743.8 | 5671.5 | 10398  | 4743.3 |
| Physalin A                    | Steroids and steroid | 9796.4 | 3026.6 | 3445.2 | 2753.6 | 22741  | 3885.8 | 3908.3 | 7908.2 | 6114.1 | 6563   | 16916  | 16303  |
| Lathosterol                   | Steroids and steroid | 4930.4 | 7555.6 | 8310.9 | 9256.2 | 6185.6 | 6727.7 | 7885.4 | 24229  | 13411  | 25719  | 12875  | 35606  |
| Dihydrotestosterone           | Steroids and steroid | 3860   | 5363.1 | 5121.1 | 8829.4 | 3167.9 | 16562  | 634.7  | 1858   | 618.88 | 0      | 0      | 1219.9 |
| Physalin L                    | Steroids and steroid | 8696.3 | 10173  | 3506.7 | 7066   | 4243.3 | 0      | 6748.2 | 9816.1 | 3649.9 | 5514   | 4771   | 8084   |
| Sitostenone                   | Steroids and steroid | 5732   | 3538.8 | 2393.2 | 4833.3 | 10256  | 2325.9 | 6673   | 5648.8 | 3654.5 | 2018.6 | 3829.5 | 2604.5 |
| 17-Hydroxyprogesterone        | Steroids and steroid | 5345.9 | 3879.2 | 0      | 5395.1 | 5492.2 | 8348.4 | 11014  | 11091  | 5019.4 | 9086.8 | 6680.9 | 6228.8 |
| 17alpha-Estradiol             | Steroids and steroid | 8145.7 | 1155.2 | 1236   | 4315   | 4048.9 | 5377.5 | 3437.7 | 5505   | 3200.6 | 2727.1 | 1778   | 5189.3 |
| Vitamin D2 (Ergocalciferol)   | Steroids and steroid | 647.68 | 1285.6 | 5544.7 | 3412.9 | 8424   | 794.87 | 2105.5 | 0      | 5723.6 | 0      | 0      | 14374  |
| 11b-Hydroxyandrost-4-en-3-one | Steroids and steroid | 2013   | 4892   | 3617.4 | 3069.1 | 1971.9 | 1733.9 | 3016.5 | 1113.4 | 753.25 | 1941   | 4380.4 | 1522.9 |
| Adrenosterone                 | Steroids and steroid | 1726.9 | 1640.8 | 2914.6 | 1457.8 | 2218.5 | 2374.7 | 2882.4 | 1631.1 | 3522.8 | 2813.5 | 4040.4 | 2675.1 |
| Androstenediol                | Steroids and steroid | 0      | 1246   | 1251.2 | 4265.9 | 1219.9 | 3497.3 | 5596.7 | 18020  | 3064.8 | 22924  | 4195.2 | 4560.5 |
| Ruscogenin                    | Steroids and steroid | 4207   | 0      | 1799.5 | 0      | 1043.7 | 2534.1 | 2219.1 | 534.58 | 3145.4 | 1866.1 | 2623.5 | 3223.3 |
| Deoxycorticosterone           | Steroids and steroid | 743.65 | 1096.4 | 2149.6 | 1695.6 | 1204.7 | 2363.5 | 1483.2 | 1874.9 | 1061.4 | 1325.5 | 2239.1 | 1581.8 |
| Helveticoside                 | Steroids and steroid | 1581   | 777.5  | 197.63 | 1052.3 | 409.91 | 863.26 | 1590.1 | 853.59 | 0      | 442.1  | 4286.2 | 2050.2 |
| 17a-Hydroxypregnenolone       | Steroids and steroid | 0      | 448.73 | 1950.6 | 919.02 | 0      | 898.75 | 348.36 | 1080.7 | 336.48 | 231.02 | 455.31 | 3279.6 |
| Officinalisinin I             | Steroids and steroid | 293.46 | 1095.9 | 71.715 | 282.28 | 453.47 | 712.69 | 1573.6 | 341.53 | 69.72  | 429.94 | 984.7  | 773.51 |
| Estradiol-17beta 3-sulfate    | Sterol lipids        | 2723.2 | 0      | 2523.3 | 1897.6 | 2919.7 | 1808.9 | 1943.9 | 3081.5 | 3464.6 | 1501.3 | 1936.3 | 914.17 |
| Loganin                       | Terpene              | 2334.7 | 0      | 0      | 609.06 | 0      | 0      | 591.57 | 0      | 594.74 | 4460.7 | 1207.3 | 0      |
| Salsolinol                    | Tetrahydroisoquinol  | 8782.1 | 4424.6 | 7503.5 | 6181.1 | 3462.5 | 3581.3 | 996.7  | 2311.3 | 251.62 | 1103.6 | 3785.6 | 3740.6 |
| (-)-Salsoline                 | Tetrahydroisoquinol  | 1961.8 | 737.79 | 3987.6 | 3585.8 | 1445.9 | 861.17 | 1296.6 | 2823.1 | 2338   | 3914.4 | 2137.1 | 961.93 |
| Biliverdin                    | Tetrapyrroles and de | 2622.8 | 975.18 | 2927.7 | 1733.8 | 0      | 1510.8 | 5523.9 | 9597.7 | 0      | 2164.7 | 5397.1 | 0      |
| Deethylatrazine               | Triazines            | 966139 | 180947 | 280904 | 368941 | 479845 | 168985 | 82161  | 128613 | 57442  | 241845 | 95167  | 63968  |
| Epifriedelanol                | Triterpenoids        | 6272.8 | 11333  | 279322 | 14910  | 11533  | 6201   | 54758  | 9232   | 32601  | 117396 | 94611  | 6306.2 |
| Betulin                       | Triterpenoids        | 7822.7 | 7866.3 | 8521.1 | 7317.8 | 5297.7 | 8198.2 | 13439  | 17327  | 9322.1 | 13448  | 17667  | 10620  |
| Shionone                      | Triterpenoids        | 9346   | 6474.4 | 11565  | 7471.6 | 2269.5 | 4954.7 | 7952.9 | 5453.4 | 6130.1 | 9338   | 4758.7 | 8623   |
| Taraxerol                     | Triterpenoids        | 5691.1 | 3697   | 11369  | 5790.5 | 6886.7 | 4990.7 | 9905   | 9162.7 | 6979.5 | 5726.2 | 4269.7 | 3101.3 |
| Dipterocarpol                 | Triterpenoids        | 5209.8 | 6654.2 | 8083.9 | 8089.7 | 1569.9 | 5980.3 | 11898  | 801.7  | 8570.4 | 4596.7 | 1563.8 | 2135   |
| Lupeol                        | Triterpenoids        | 5494.2 | 3783.6 | 4643.5 | 7780.4 | 4659.7 | 5576.4 | 9564.1 | 3110.2 | 1435.1 | 7135.3 | 13285  | 4687.3 |

|                                    |                      |        |        |        |        |        |        |        |        |        |        |        |        |
|------------------------------------|----------------------|--------|--------|--------|--------|--------|--------|--------|--------|--------|--------|--------|--------|
| Germanicol                         | Triterpenoids        | 8181.2 | 1857   | 3013.9 | 6145.7 | 6886.7 | 3171.3 | 15025  | 5006.6 | 6979.5 | 6665.7 | 4269.7 | 5488.5 |
| Ganoderic acid H                   | Triterpenoids        | 5942.5 | 2366.3 | 0      | 16208  | 0      | 3046.9 | 16641  | 12649  | 10757  | 14220  | 6277.5 | 0      |
| Ginsenoside F2                     | Triterpenoids        | 0      | 1544.8 | 0      | 0      | 25994  | 0      | 17537  | 13025  | 0      | 0      | 4569   | 0      |
| Simiarenol                         | Triterpenoids        | 5691.1 | 1857   | 3013.9 | 6145.7 | 6886.7 | 3171.3 | 15025  | 5006.6 | 6979.5 | 6665.7 | 4269.7 | 5206.5 |
| Ganoderic acid F                   | Triterpenoids        | 4523.9 | 2340.3 | 4757.1 | 2998.4 | 6926   | 3340.8 | 18446  | 12954  | 5202.9 | 5064.7 | 16334  | 7540.8 |
| Limonexic acid                     | Triterpenoids        | 3781.1 | 1857   | 4894.6 | 3980   | 5156.7 | 2460.7 | 4824.3 | 11038  | 15602  | 5156.6 | 8696.8 | 1249.6 |
| Glycyrrhetic acid 3-O-mor          | Triterpenoids        | 4788.4 | 3425.8 | 1598.1 | 3957.2 | 4148.3 | 3385.7 | 5466.4 | 2358.6 | 2231.3 | 3050.4 | 2143.2 | 2417.2 |
| Taraxasterone                      | Triterpenoids        | 2235.6 | 1947.7 | 2377.8 | 5431.2 | 3287.6 | 3719.5 | 3138.9 | 3897.4 | 1609.5 | 3496.5 | 2892.4 | 2139   |
| Jangomolide                        | Triterpenoids        | 2889.4 | 646.51 | 3289.1 | 2742.2 | 1747.2 | 1463.1 | 3269.3 | 2590.1 | 1512.6 | 739.09 | 4259.4 | 1082.5 |
| 11-Keto-beta-boswellic ac          | Triterpenoids        | 2647.9 | 2569.6 | 2353.5 | 2585.1 | 524.34 | 1918.9 | 3163.5 | 2829.3 | 2812.3 | 813.4  | 2480.9 | 1895   |
| N-Acetyl-5-hydroxytrypta           | Tryptamine derivativ | 3339   | 8180.1 | 10147  | 2473.4 | 10580  | 4556.3 | 5787.8 | 8948.9 | 5303.8 | 16271  | 7437.4 | 4747.3 |
| N-Methyltryptamine                 | Tryptamine derivativ | 3469.1 | 4027.9 | 5829.5 | 2970.6 | 1599.7 | 2531.6 | 2190.4 | 8002.1 | 4919.1 | 6359.8 | 3859   | 3968.2 |
| Pyridoxine                         | Vitamins             | 258430 | 214777 | 216504 | 397032 | 273934 | 427050 | 51268  | 37639  | 55874  | 133536 | 31031  | 33620  |
| Thiamine                           | Vitamins             | 78802  | 0      | 122605 | 116443 | 69508  | 113225 | 35376  | 21985  | 22093  | 40287  | 18758  | 63053  |
| D-Pantothenic acid                 | Vitamins             | 1767.4 | 2673.5 | 1312.8 | 3596.2 | 992.91 | 1609.2 | 1929.2 | 640.37 | 2118.7 | 16759  | 998.01 | 1676.2 |
| Garcinone D                        | Xanthones            | 13493  | 10990  | 5717.7 | 7729.7 | 16962  | 5980.2 | 6334.5 | 8657.3 | 9610.5 | 3832.7 | 7911.7 | 7804.7 |
| Swertiaperennin                    | Xanthones            | 5335.5 | 7345.3 | 4412.7 | 10278  | 13352  | 5100.4 | 634.7  | 7073.3 | 1191.3 | 4584.2 | 1288   | 3226   |
| Maclurin                           | Xanthones            | 1107.6 | 4428.9 | 13057  | 7871   | 6673.2 | 5495.3 | 1703.5 | 1206.6 | 6904.1 | 5339.6 | 4806.8 | 1729   |
| Beta-mangostin                     | Xanthones            | 8270.4 | 3182.5 | 5743.5 | 8037.3 | 9167   | 3357.8 | 2912.9 | 8706.2 | 7660   | 2700.4 | 3907.8 | 8830   |
| Mangiferin                         | Xanthones            | 13487  | 2418.7 | 4799.3 | 3106.5 | 7722   | 4214   | 0      | 3163.1 | 0      | 1863.5 | 0      | 2397.4 |
| Isogentisin                        | Xanthones            | 3514.8 | 3570.9 | 6584.2 | 3038.6 | 5394.6 | 10429  | 1215.9 | 3355.7 | 935.09 | 1767.5 | 1250.1 | 3096   |
| 1,3,6-Trihydroxy-5-metho           | Xanthones            | 3922.4 | 5958   | 1993.5 | 5455.5 | 4678.8 | 3558.2 | 3729.9 | 6789.1 | 2189.5 | 3843.3 | 5965.3 | 5879.8 |
| Bellidifolin                       | Xanthones            | 3922.4 | 5958   | 1993.5 | 5455.5 | 4678.8 | 1578.1 | 3729.9 | 6789.1 | 3837.3 | 3843.3 | 5965.3 | 5879.8 |
| 2-Hydroxyxanthone                  | Xanthones            | 3639.2 | 3562.6 | 2055.2 | 1371.4 | 3851.4 | 3518.3 | 3027.5 | 2514.2 | 3235.2 | 2225.6 | 2194.1 | 2459.9 |
| Lancerin                           | Xanthones            | 2423.8 | 2730   | 0      | 3540.7 | 1396.3 | 6306   | 2827.3 | 9103.3 | 2140   | 3546.9 | 19548  | 3512.4 |
| 4-Hydroxyphenylacetylglutamic acid |                      | 4E+06  | 2E+06  | 2E+06  | 7E+06  | 3E+06  | 4E+06  | 4E+06  | 6E+06  | 3E+06  | 3E+06  | 3E+06  | 3E+06  |
| cis-9,10-Epoxystearic acid         |                      | 3E+06  | 992079 | 1E+06  | 2E+06  | 3E+06  | 1E+06  | 3E+06  | 2E+06  | 1E+06  | 2E+06  | 2E+06  | 2E+06  |
| 5-Methyl-2-furaldehyde             |                      | 526884 | 355500 | 499082 | 469644 | 274607 | 880243 | 510769 | 507606 | 369420 | 614187 | 358303 | 361305 |
| 6-Amino-2-oxohexanoate             |                      | 280318 | 271347 | 206206 | 272689 | 215880 | 220448 | 35807  | 81354  | 154984 | 44069  | 270301 | 159870 |
| Styrene-cis-2,3-dihydrodiol        |                      | 139267 | 188461 | 186240 | 117585 | 100246 | 280328 | 5708.8 | 13708  | 16922  | 2976.3 | 6956.3 | 8981.8 |
| 2-Hydroxy-3-methylbenzalpyruvate   |                      | 88436  | 50133  | 61875  | 46175  | 97985  | 89049  | 41647  | 53658  | 51287  | 25919  | 24892  | 48483  |
| 4-Sulfobenzoate                    |                      | 9578.5 | 50549  | 50679  | 53284  | 39440  | 76425  | 17276  | 19883  | 25816  | 14903  | 16281  | 15462  |

|                                                         |        |        |        |        |        |        |        |        |        |        |        |        |
|---------------------------------------------------------|--------|--------|--------|--------|--------|--------|--------|--------|--------|--------|--------|--------|
| (2S,5S)-trans-Carboxymethylproline                      | 18944  | 15039  | 10800  | 7926   | 17979  | 29847  | 7816.9 | 12705  | 5882.5 | 8006.7 | 11063  | 10185  |
| 3-Methylsalicylaldehyde                                 | 7099.6 | 17907  | 12637  | 19494  | 13098  | 10344  | 8753.2 | 9703.3 | 12687  | 10177  | 33273  | 10912  |
| 12-OPDA                                                 | 42011  | 1246   | 695.47 | 5573.7 | 2804   | 3497.3 | 5596.7 | 18020  | 3591.6 | 22924  | 4195.2 | 4560.5 |
| 5-Hydroxyconiferaldehyde                                | 7682.9 | 4496.1 | 12363  | 3579.1 | 10860  | 3813.5 | 6755.7 | 2641.3 | 3106.8 | 4136.2 | 3128.4 | 1526.8 |
| Toluene-cis-dihydrodiol                                 | 5278.1 | 4053   | 9224   | 4665.6 | 3620.1 | 13024  | 4601.1 | 7270.6 | 3905.2 | 5721.2 | 4293.1 | 4091.7 |
| 2-Hydroxy-3-carboxybenzalpyruvate                       | 6226.9 | 3451.5 | 13522  | 1882.5 | 4111.9 | 10345  | 2940.8 | 4550.1 | 4230.9 | 7988.8 | 6849.6 | 9110.1 |
| S-(Phenylacetothiohydroximoyl)-L-cysteine               | 3887.3 | 5212.6 | 6365.3 | 4340.9 | 11144  | 3139   | 4663   | 15180  | 0      | 4364.8 | 5295.4 | 7551.2 |
| N5-(L-1-Carboxyethyl)-L-ornithine                       | 3522.5 | 8852.4 | 2641.3 | 6057.2 | 5121.6 | 7146.6 | 7891   | 4451   | 6794   | 3733.5 | 4166.8 | 6633.9 |
| 3-(2,3-Dihydroxyphenyl)propanoate                       | 3269.3 | 3965.1 | 4712.8 | 5070   | 5574.3 | 5820.5 | 6578.3 | 6230.2 | 5441.5 | 3100.6 | 3441.6 | 5267.6 |
| N,N-Dihydroxy-L-phenylalanine                           | 3191.2 | 9827   | 2986.9 | 1848.5 | 2146   | 2779.9 | 2053.2 | 2923.3 | 981.03 | 4260.1 | 1595.2 | 785.56 |
| 9-Riburonosyladenine                                    | 2697.3 | 1224.9 | 663.84 | 2874.5 | 1931.8 | 10154  | 7160.3 | 4836   | 6944   | 4883   | 6536.5 | 3413.7 |
| cis-3-(Carboxy-ethyl)-3,5-cyclo-hexadiene-1,2- $\alpha$ | 4314.4 | 543.35 | 1096.5 | 4143.7 | 4293.9 | 3823.1 | 2699.9 | 2223.5 | 3825.6 | 3822.1 | 1616.1 | 5843.1 |
| O-Succinyl-L-homoserine                                 | 3324.9 | 1309.5 | 3974.9 | 2852.7 | 1859.4 | 1730.5 | 1679.2 | 2250.6 | 1540.9 | 4362   | 1676.3 | 2139.5 |
