# Supplementary material
Source: publisher site journal article supplement (https://www.dovepress.com/article/335312)
Supplement: Supplementary file 2 [file 335312 Revised Table S2.pdf › 335312 Revised Table S2.pdf]

**Table S2. Network pharmacology predictions revealed that betel nut targets 141 genes**

| compound                  | Target ID   | P-Value  | Max Tc | Cut Sum | Z-Score  | Name     | Descriptor                       | Target ID |
|---------------------------|-------------|----------|--------|---------|----------|----------|----------------------------------|-----------|
| 2,5-Dihydroxybenzaldehyde | CP2C8_HUMAN | 9.4E-07  | 0.2857 | 0.2857  | 10.3704  | CYP2C8   | Cytochrome                       | CP2C8     |
| 2,5-Dihydroxybenzaldehyde | ERN1_HUMAN  | 3.77E-75 | 0.64   | 32.3901 | 133.1635 | ERN1     | Serine/threonine                 | ERN1      |
| 2,5-Dihydroxybenzaldehyde | ESR1_HUMAN  | 5.34E-14 | 0.4444 | 17.2198 | 23.3776  | ESR1     | Estrogen receptor                | ESR1      |
| 2,5-Dihydroxybenzaldehyde | TTHY_HUMAN  | 3.85E-11 | 0.3793 | 1.5766  | 18.2482  | TTR      | Transthyretin                    | TTHY      |
| 2-Chloro-DL-Phenylalanine | ACES_HUMAN  | 4E-08    | 0.4211 | 12.6543 | 12.8322  | ACHE     | Acetylcholinesterase             | ACES      |
| 2-Chloro-DL-Phenylalanine | CP19A_HUMAN | 1.47E-06 | 0.4516 | 6.7303  | 10.0229  | CYP19A1  | Aromatase                        | CP19A     |
| 2-Chloro-DL-Phenylalanine | CP1A2_HUMAN | 1.34E-14 | 1      | 29.8872 | 24.4516  | CYP1A2   | Cytochrome                       | CP1A2     |
| 2-Chloro-DL-Phenylalanine | CP2C9_HUMAN | 1.4E-08  | 0.4571 | 13.8788 | 13.6483  | CYP2C9   | Cytochrome                       | CP2C9     |
| 2-Chloro-DL-Phenylalanine | CP2CJ_HUMAN | 1.91E-11 | 0.4706 | 23.5972 | 18.7942  | CYP2C19  | Cytochrome                       | CP2CJ     |
| 2-Chloro-DL-Phenylalanine | DNM3A_HUMAN | 2.85E-06 | 0.2857 | 0.2857  | 9.5055   | DNMT3A   | DNA (cytosine)                   | DNM3A     |
| 2-Chloro-DL-Phenylalanine | EST2_HUMAN  | 5.28E-10 | 0.3571 | 1.8751  | 16.2063  | CES2     | Cocaine esterase                 | EST2      |
| 2-Chloro-DL-Phenylalanine | GSTM2_HUMAN | 1.6E-09  | 0.3878 | 0.7603  | 15.3397  | GSTM2    | Glutathione S-transferase        | GSTM2     |
| 2-Chloro-DL-Phenylalanine | GSTP1_HUMAN | 7.86E-06 | 0.3878 | 0.7603  | 8.7139   | GSTP1    | Glutathione S-transferase        | GSTP1     |
| 2-Chloro-DL-Phenylalanine | HS71A_HUMAN | 4.38E-07 | 0.3529 | 0.3529  | 10.9655  | HSPA1A   | Heat shock protein               | HS71A     |
| 2-Chloro-DL-Phenylalanine | HS90A_HUMAN | 4.17E-07 | 0.5588 | 8.0925  | 11.0034  | HSP90AA1 | Heat shock protein               | HS90A     |
| 2-Chloro-DL-Phenylalanine | LDLR_HUMAN  | 2.26E-06 | 0.2909 | 0.2909  | 9.6861   | LDLR     | Low-density lipoprotein receptor | LDLR      |
| 2-Chloro-DL-Phenylalanine | NR4A1_HUMAN | 5.3E-08  | 0.3529 | 0.9281  | 12.6122  | NR4A1    | Nuclear receptor                 | NR4A1     |
| 2-Chloro-DL-Phenylalanine | RARA_HUMAN  | 2.17E-10 | 0.4419 | 2.5183  | 16.899   | RARA     | Retinoic acid receptor           | RARA      |
| 2-Chloro-DL-Phenylalanine | S22A2_HUMAN | 3.1E-07  | 0.4222 | 0.4222  | 11.2349  | SLC22A2  | Solute carrier                   | S22A2     |
| 2-Chloro-DL-Phenylalanine | SMAD3_HUMAN | 1E-10    | 0.4318 | 0.4318  | 17.4999  | SMAD3    | Mothers against decapentaplegic  | SMAD3     |
| 2-Chloro-DL-Phenylalanine | STAT1_HUMAN | 4.26E-12 | 0.4091 | 1.9885  | 19.9642  | STAT1    | Signal transducer                | STAT1     |
| 2-Chloro-DL-Phenylalanine | TLR4_HUMAN  | 7.79E-10 | 0.3091 | 1.1811  | 15.9027  | TLR4     | Toll-like receptor               | TLR4      |
| 2-Chloro-DL-Phenylalanine | XBP1_HUMAN  | 1.6E-07  | 0.3333 | 2.7149  | 11.7509  | XBP1     | X-box-binding protein            | XBP1      |
| 2-Hydroxybutanoic acid    | ACE2_HUMAN  | 5.56E-06 | 0.3226 | 0.6038  | 8.9849   | ACE2     | Angiotensin-converting enzyme    | ACE2      |
| 2-Hydroxybutanoic acid    | GSH1_HUMAN  | 1.79E-54 | 0.303  | 0.8913  | 96.0447  | GCLC     | Glutamate-cysteine ligase        | GSH1      |
| 2-Pentylfuran             | PER2_HUMAN  | 1.28E-10 | 0.3214 | 0.9148  | 17.3095  | PER2     | Period circadian clock           | PER2      |
| 3,4-Dihydroxybenzaldehyde | A4_HUMAN    | 9.85E-19 | 0.4348 | 12.6837 | 31.8777  | APP      | Amyloid-beta                     | A4        |
| 3,4-Dihydroxybenzaldehyde | CH60_HUMAN  | 6.38E-20 | 0.35   | 0.6988  | 34.0117  | HSPD1    | 60 kDa heat shock protein        | CH60      |
| 3,4-Dihydroxybenzaldehyde | CP2C8_HUMAN | 6.71E-07 | 0.2927 | 0.2927  | 10.6333  | CYP2C8   | Cytochrome                       | CP2C8     |
| 3,4-Dihydroxybenzaldehyde | EGFR_HUMAN  | 7.05E-07 | 0.5714 | 17.6339 | 10.5948  | EGFR     | Epidermal growth factor receptor | EGFR      |
| 3,4-Dihydroxybenzaldehyde | ERN1_HUMAN  | 5.12E-34 | 0.4286 | 14.604  | 59.3168  | ERN1     | Serine/threonine kinase          | ERN1      |
| 3,4-Dihydroxybenzaldehyde | FOS_HUMAN   | 8.02E-07 | 0.3226 | 0.6384  | 10.4935  | FOS      | Proto-oncogene                   | FOS       |
| 3,4-Dihydroxybenzaldehyde | MMP9_HUMAN  | 3.08E-06 | 0.5357 | 7.9102  | 9.4437   | MMP9     | Matrix metalloproteinase         | MMP9      |

|                                  |             |          |        |         |          |          |                    |
|----------------------------------|-------------|----------|--------|---------|----------|----------|--------------------|
| 3,4-Dihydroxybenzaldehyde        | NF2L2_HUMAN | 8.57E-11 | 0.3333 | 1.265   | 17.6237  | NFE2L2   | Nuclear fac NF2L2  |
| 3,4-Dihydroxybenzaldehyde        | NFKB1_HUMAN | 1.04E-07 | 0.3158 | 0.6158  | 12.0899  | NFKB1    | Nuclear fac NFKB1  |
| 3,4-Dihydroxybenzaldehyde        | PAI1_HUMAN  | 2.18E-08 | 0.3667 | 1.8761  | 13.3058  | SERPINE1 | Plasminoge PAI1    |
| 3,4-Dihydroxybenzaldehyde        | PPBT_HUMAN  | 5E-06    | 0.4828 | 1.9153  | 9.0669   | ALPL     | Alkaline pt PPBT   |
| 3,4-Dihydroxybenzaldehyde        | SDF1_HUMAN  | 1.9E-08  | 0.4286 | 0.4286  | 13.4105  | CXCL12   | Stromal cel SDF1   |
| 3,4-Dihydroxybenzaldehyde        | SYUA_HUMAN  | 1.44E-18 | 0.4839 | 4.2966  | 31.5831  | SNCA     | Alpha-synu SYUA    |
| 3,4-Dihydroxybenzaldehyde        | TTHY_HUMAN  | 7.55E-15 | 0.4571 | 2.1291  | 24.9055  | TTR      | Transthyret TTHY   |
| 3-Ethyl-1,2-benzenediol          | CREB1_HUMAN | 6.33E-15 | 0.2826 | 0.2826  | 25.0369  | CREB1    | Cyclic AM CREB1    |
| 3-Ethyl-1,2-benzenediol          | DOPO_HUMAN  | 4.06E-29 | 0.4583 | 1.166   | 50.522   | DBH      | Dopamine l DOPO    |
| 3-Ethyl-1,2-benzenediol          | PERM_HUMAN  | 5.4E-09  | 0.3448 | 2.1428  | 14.3934  | MPO      | Myelopero: PERM    |
| 3-Ethyl-1,2-benzenediol          | TTHY_HUMAN  | 1.76E-06 | 0.3077 | 0.8824  | 9.8835   | TTR      | Transthyret TTHY   |
| 4-Hydroxybenzaldehyde            | A4_HUMAN    | 1.39E-08 | 0.5    | 5.7962  | 13.6582  | APP      | Amyloid-b A4       |
| 4-Hydroxybenzaldehyde            | CP1B1_HUMAN | 6.32E-07 | 0.4583 | 1.4702  | 10.68    | CYP1B1   | Cytochrom CP1B1    |
| 4-Hydroxybenzaldehyde            | ERN1_HUMAN  | 1.05E-08 | 0.3429 | 3.6586  | 13.8718  | ERN1     | Serine/thre ERN1   |
| 4-Hydroxybenzaldehyde            | ESR1_HUMAN  | 8.18E-10 | 0.4583 | 12.1753 | 15.8642  | ESR1     | Estrogen re ESR1   |
| 4-Hydroxybenzaldehyde            | MIF_HUMAN   | 5.23E-19 | 0.3548 | 4.1638  | 32.3712  | MIF      | Macrophag MIF      |
| 4-Hydroxybenzaldehyde            | MMP9_HUMAN  | 3.37E-06 | 0.4    | 7.864   | 9.3752   | MMP9     | Matrix met MMP9    |
| 4-Hydroxybenzaldehyde            | SDF1_HUMAN  | 1.76E-07 | 0.375  | 0.375   | 11.6786  | CXCL12   | Stromal cel SDF1   |
| 4-Hydroxybenzaldehyde            | TTHY_HUMAN  | 2.62E-10 | 0.4583 | 1.4524  | 16.7513  | TTR      | Transthyret TTHY   |
| 4-Hydroxyphenylacetylglutamic ac | ACE2_HUMAN  | 1.3E-102 | 0.4286 | 11.4805 | 182.4645 | ACE2     | Angiotensin ACE2   |
| 4-Hydroxyphenylacetylglutamic ac | ANF_HUMAN   | 9.99E-16 | 0.2931 | 0.5808  | 26.4687  | NPPA     | Natriuretic ANF    |
| 4-Hydroxyphenylacetylglutamic ac | CASP1_HUMAN | 1.1E-18  | 0.371  | 9.2704  | 31.7917  | CASP1    | Caspase-1 CASP1    |
| 4-Hydroxyphenylacetylglutamic ac | CASP9_HUMAN | 1.13E-09 | 0.3425 | 0.6425  | 15.6115  | CASP9    | Caspase-9 CASP9    |
| 4-Hydroxyphenylacetylglutamic ac | CATL1_HUMAN | 5.68E-09 | 0.3729 | 8.3273  | 14.3532  | CTSL     | Cathepsin I CATL1  |
| 4-Hydroxyphenylacetylglutamic ac | ESR1_HUMAN  | 6E-09    | 0.3929 | 11.1325 | 14.311   | ESR1     | Estrogen re ESR1   |
| 4-Hydroxyphenylacetylglutamic ac | GLUT4_HUMAN | 1.28E-40 | 0.339  | 0.661   | 71.1721  | SLC2A4   | Solute carri GLUT4 |
| 4-Hydroxyphenylacetylglutamic ac | GRIA1_HUMAN | 1.85E-39 | 0.4182 | 5.3896  | 69.0883  | GRIA1    | Glutamate r GRIA1  |
| 4-Hydroxyphenylacetylglutamic ac | GSHR_HUMAN  | 5.75E-06 | 0.4468 | 0.4468  | 8.958    | GSR      | Glutathione GSHR   |
| 4-Hydroxyphenylacetylglutamic ac | GSTM1_HUMAN | 6.61E-22 | 0.35   | 0.35    | 37.5744  | GSTM1    | Glutathione GSTM1  |
| 4-Hydroxyphenylacetylglutamic ac | GSTP1_HUMAN | 8.22E-11 | 0.3115 | 1.4797  | 17.6561  | GSTP1    | Glutathione GSTP1  |
| 4-Hydroxyphenylacetylglutamic ac | HDAC1_HUMAN | 7.09E-07 | 0.3617 | 12.2783 | 10.5897  | HDAC1    | Histone de HDAC1   |
| 4-Hydroxyphenylacetylglutamic ac | HMDH_HUMAN  | 2.22E-16 | 0.4531 | 4.3776  | 27.5113  | HMGCR    | 3-hydroxy- HMDH    |
| 4-Hydroxyphenylacetylglutamic ac | IL1B_HUMAN  | 6.66E-16 | 0.3016 | 0.3016  | 26.7357  | IL1B     | Interleukin IL1B   |
| 4-Hydroxyphenylacetylglutamic ac | ITB1_HUMAN  | 2.46E-24 | 0.5306 | 16.208  | 41.9344  | ITGB1    | Integrin bet ITB1  |
| 4-Hydroxyphenylacetylglutamic ac | MMP13_HUMAN | 3.91E-18 | 0.4815 | 24.0685 | 30.8026  | MMP13    | Collagenas MMP13   |
| 4-Hydroxyphenylacetylglutamic ac | MMP2_HUMAN  | 3.78E-25 | 0.4815 | 37.4593 | 43.3961  | MMP2     | 72 kDa typ MMP2    |
| 4-Hydroxyphenylacetylglutamic ac | MMP3_HUMAN  | 5.55E-16 | 0.4815 | 16.8152 | 27.0124  | MMP3     | Stromelysin MMP3   |

|                                  |             |          |        |         |         |        |                    |
|----------------------------------|-------------|----------|--------|---------|---------|--------|--------------------|
| 4-Hydroxyphenylacetylglutamic ac | MMP9_HUMAN  | 7.57E-12 | 0.4194 | 14.7083 | 19.5158 | MMP9   | Matrix met MMP9    |
| 4-Hydroxyphenylacetylglutamic ac | MPIP2_HUMAN | 7.55E-09 | 0.3729 | 2.6927  | 14.132  | CDC25B | M-phase in MPIP2   |
| 4-Hydroxyphenylacetylglutamic ac | PCNA_HUMAN  | 1.09E-54 | 0.3529 | 3.099   | 96.4291 | PCNA   | Proliferatin PCNA  |
| 4-Hydroxyphenylacetylglutamic ac | SRC_HUMAN   | 4.14E-07 | 0.4576 | 10.6716 | 11.0105 | SRC    | Proto-onco, SRC    |
| 4-Hydroxyphenylacetylglutamic ac | THA_HUMAN   | 1.29E-13 | 0.3621 | 4.9282  | 22.6923 | THRA   | Thyroid ho THA     |
| 4-Hydroxyphenylacetylglutamic ac | TY3H_HUMAN  | 2.14E-18 | 0.2917 | 0.2917  | 31.2729 | TH     | Tyrosine 3- TY3H   |
| 4-Methylbenzaldehyde             | ALBU_HUMAN  | 5.37E-07 | 0.2973 | 0.2973  | 10.8074 | ALB    | Serum albu ALBU    |
| 4-Methylbenzaldehyde             | EST2_HUMAN  | 5.15E-06 | 0.4091 | 1.0886  | 9.0438  | CES2   | Cocaine est EST2   |
| 4-Methylbenzaldehyde             | NF2L2_HUMAN | 3.34E-24 | 0.4583 | 2.9288  | 41.698  | NFE2L2 | Nuclear fac NF2L2  |
| 4-Methylbenzaldehyde             | SDF1_HUMAN  | 3.93E-06 | 0.3    | 0.3     | 9.2541  | CXCL12 | Stromal cel SDF1   |
| 5-Aminovaleric acid              | DCOR_HUMAN  | 1.89E-09 | 0.3571 | 0.3571  | 15.2116 | ODC1   | Ornithine d DCOR   |
| 5-Aminovaleric acid              | FABP4_HUMAN | 5.88E-11 | 0.3438 | 2.7443  | 17.917  | FABP4  | Fatty acid-l FABP4 |
| 5-Aminovaleric acid              | GSHR_HUMAN  | 1.26E-07 | 0.2973 | 0.5868  | 11.9378 | GSR    | Glutathione GSHR   |
| 5-Aminovaleric acid              | HMDH_HUMAN  | 1.28E-07 | 0.3929 | 1.9872  | 11.922  | HMGCR  | 3-hydroxy- HMDH    |
| 6-Amino-2-oxohexanoate           | DCOR_HUMAN  | 7.17E-09 | 0.3333 | 0.3333  | 14.1722 | ODC1   | Ornithine d DCOR   |
| 6-Amino-2-oxohexanoate           | EST2_HUMAN  | 1.66E-12 | 0.375  | 2.3682  | 20.6967 | CES2   | Cocaine est EST2   |
| 6-Aminocaproic acid              | DCOR_HUMAN  | 3.77E-09 | 0.3448 | 0.3448  | 14.674  | ODC1   | Ornithine d DCOR   |
| 6-Aminocaproic acid              | FABP4_HUMAN | 1E-09    | 0.3333 | 2.4236  | 15.7053 | FABP4  | Fatty acid-l FABP4 |
| 6-Aminocaproic acid              | GSHR_HUMAN  | 7.6E-08  | 0.3158 | 0.6053  | 12.3315 | GSR    | Glutathione GSHR   |
| 6-Aminocaproic acid              | HMDH_HUMAN  | 2.83E-08 | 0.4286 | 2.1678  | 13.1002 | HMGCR  | 3-hydroxy- HMDH    |
| 8,9-DiHETrE                      | CNR1_HUMAN  | 6E-15    | 0.5833 | 29.2203 | 25.0782 | CNR1   | Cannabinoid CNR1   |
| 8,9-DiHETrE                      | EST2_HUMAN  | 4.09E-11 | 0.325  | 2.0939  | 18.1994 | CES2   | Cocaine est EST2   |
| 8,9-DiHETrE                      | HMDH_HUMAN  | 8.02E-12 | 0.4444 | 3.1446  | 19.4704 | HMGCR  | 3-hydroxy- HMDH    |
| 8,9-DiHETrE                      | PPARA_HUMAN | 3.34E-08 | 0.7812 | 10.0072 | 12.9732 | PPARA  | Peroxisome PPARA   |
| 8,9-DiHETrE                      | PPARG_HUMAN | 2.74E-08 | 0.7812 | 13.9278 | 13.1278 | PPARG  | Peroxisome PPARG   |
| 8-Geranyloxypsoralen             | CP1A1_HUMAN | 1.24E-09 | 0.5439 | 0.8772  | 15.5418 | CYP1A1 | Cytochrome CP1A1   |
| 8-Geranyloxypsoralen             | CP1B1_HUMAN | 3.41E-06 | 0.8125 | 1.3037  | 9.3649  | CYP1B1 | Cytochrome CP1B1   |
| 8-Geranyloxypsoralen             | NFKB1_HUMAN | 3.18E-08 | 0.3333 | 0.6606  | 13.0109 | NFKB1  | Nuclear fac NFKB1  |
| Argininosuccinate                | ARG1_HUMAN  | 6.93E-49 | 0.3182 | 0.6123  | 86.0113 | ARG1   | Arginase-1 ARG1    |
| Argininosuccinate                | DCOR_HUMAN  | 2.72E-08 | 0.3095 | 0.3095  | 13.1328 | ODC1   | Ornithine d DCOR   |
| Argininosuccinate                | GSTM1_HUMAN | 1.33E-18 | 0.2951 | 0.2951  | 31.6419 | GSTM1  | Glutathione GSTM1  |
| Argininosuccinate                | GSTP1_HUMAN | 1.25E-06 | 0.2951 | 0.8759  | 10.1506 | GSTP1  | Glutathione GSTP1  |
| Argininosuccinate                | NOS2_HUMAN  | 4.44E-13 | 0.5526 | 6.8601  | 21.7268 | NOS2   | Nitric oxide NOS2  |
| Argininosuccinate                | NOS3_HUMAN  | 3.13E-10 | 0.5526 | 3.1307  | 16.6127 | NOS3   | Nitric oxide NOS3  |
| Benzaldehyde                     | AOFB_HUMAN  | 4.63E-06 | 0.4737 | 7.3139  | 9.1278  | MAOB   | Amine oxid AOFB    |
| Benzaldehyde                     | DOPO_HUMAN  | 1.67E-08 | 0.3182 | 0.3182  | 13.5108 | DBH    | Dopamine l DOPO    |
| Benzaldehyde                     | EST2_HUMAN  | 2.17E-08 | 0.35   | 1.557   | 13.3097 | CES2   | Cocaine est EST2   |

|                             |             |          |        |         |          |          |                    |
|-----------------------------|-------------|----------|--------|---------|----------|----------|--------------------|
| Benzaldehyde                | NF2L2_HUMAN | 1.11E-16 | 0.3462 | 1.9865  | 28.0628  | NFE2L2   | Nuclear fac NF2L2  |
| Benzaldehyde                | TF65_HUMAN  | 2.13E-06 | 0.3462 | 1.0027  | 9.7326   | RELA     | Transcripti TF65   |
| Benzocaine                  | ACES_HUMAN  | 4E-08    | 0.4211 | 12.6543 | 12.8322  | ACHE     | Acetylcholi ACES   |
| Benzocaine                  | CP19A_HUMAN | 1.47E-06 | 0.4516 | 6.7303  | 10.0229  | CYP19A1  | Aromatase CP19A    |
| Benzocaine                  | CP1A2_HUMAN | 1.34E-14 | 1      | 29.8872 | 24.4516  | CYP1A2   | Cytochrom CP1A2    |
| Benzocaine                  | CP2C9_HUMAN | 1.4E-08  | 0.4571 | 13.8788 | 13.6483  | CYP2C9   | Cytochrom CP2C9    |
| Benzocaine                  | CP2CJ_HUMAN | 1.91E-11 | 0.4706 | 23.5972 | 18.7942  | CYP2C19  | Cytochrom CP2CJ    |
| Benzocaine                  | DNM3A_HUMAN | 2.85E-06 | 0.2857 | 0.2857  | 9.5055   | DNMT3A   | DNA (cyto DNM3A    |
| Benzocaine                  | EST2_HUMAN  | 5.28E-10 | 0.3571 | 1.8751  | 16.2063  | CES2     | Cocaine est EST2   |
| Benzocaine                  | GSTM2_HUMAN | 1.6E-09  | 0.3878 | 0.7603  | 15.3397  | GSTM2    | Glutathione GSTM2  |
| Benzocaine                  | GSTP1_HUMAN | 7.86E-06 | 0.3878 | 0.7603  | 8.7139   | GSTP1    | Glutathione GSTP1  |
| Benzocaine                  | HS71A_HUMAN | 4.38E-07 | 0.3529 | 0.3529  | 10.9655  | HSPA1A   | Heat shock HS71A   |
| Benzocaine                  | HS90A_HUMAN | 4.17E-07 | 0.5588 | 8.0925  | 11.0034  | HSP90AA1 | Heat shock HS90A   |
| Benzocaine                  | LDLR_HUMAN  | 2.26E-06 | 0.2909 | 0.2909  | 9.6861   | LDLR     | Low-densit LDLR    |
| Benzocaine                  | NR4A1_HUMAN | 5.3E-08  | 0.3529 | 0.9281  | 12.6122  | NR4A1    | Nuclear rec NR4A1  |
| Benzocaine                  | RARA_HUMAN  | 2.17E-10 | 0.4419 | 2.5183  | 16.899   | RARA     | Retinoic ac RARA   |
| Benzocaine                  | S22A2_HUMAN | 3.1E-07  | 0.4222 | 0.4222  | 11.2349  | SLC22A2  | Solute carri S22A2 |
| Benzocaine                  | SMAD3_HUMAN | 1E-10    | 0.4318 | 0.4318  | 17.4999  | SMAD3    | Mothers ag SMAD3   |
| Benzocaine                  | STAT1_HUMAN | 4.26E-12 | 0.4091 | 1.9885  | 19.9642  | STAT1    | Signal tran STAT1  |
| Benzocaine                  | TLR4_HUMAN  | 7.79E-10 | 0.3091 | 1.1811  | 15.9027  | TLR4     | Toll-like re TLR4  |
| Benzocaine                  | XBP1_HUMAN  | 1.6E-07  | 0.3333 | 2.7149  | 11.7509  | XBP1     | X-box-bind XBP1    |
| Cianidanol                  | CP1B1_HUMAN | 6.98E-10 | 0.4082 | 2.1419  | 15.9885  | CYP1B1   | Cytochrom CP1B1    |
| Cianidanol                  | ESR1_HUMAN  | 6.45E-06 | 0.3269 | 7.4782  | 8.8683   | ESR1     | Estrogen re ESR1   |
| Cianidanol                  | PPBT_HUMAN  | 0.002625 | 1      | 1       | 4.1825   | ALPL     | Alkaline pl PPBT   |
| Cianidanol                  | VEGFA_HUMAN | 5.48E-26 | 0.5636 | 1.5903  | 44.9013  | VEGFA    | Vascular er VEGFA  |
| cis-9,10-Epoxy stearic acid | EST2_HUMAN  | 6.08E-22 | 0.4483 | 4.2286  | 37.6392  | CES2     | Cocaine est EST2   |
| cis-9,10-Epoxy stearic acid | HMDH_HUMAN  | 8.66E-15 | 0.5312 | 3.9614  | 24.7973  | HMGCR    | 3-hydroxy- HMDH    |
| cis-9,10-Epoxy stearic acid | HYEP_HUMAN  | 1.54E-20 | 0.3256 | 5.7926  | 35.1218  | EPHX1    | Epoxide hy HYEP    |
| cis-9,10-Epoxy stearic acid | KPCA_HUMAN  | 1.97E-14 | 0.381  | 9.6366  | 24.1575  | PRKCA    | Protein kin KPCA   |
| cis-9,10-Epoxy stearic acid | MPIP2_HUMAN | 5.17E-14 | 0.4103 | 4.3296  | 23.4029  | CDC25B   | M-phase in MPIP2   |
| cis-9,10-Epoxy stearic acid | PPARA_HUMAN | 3.87E-06 | 0.6538 | 7.57    | 9.2668   | PPARA    | Peroxisom PPARA    |
| cis-9,10-Epoxy stearic acid | PPARG_HUMAN | 5.57E-07 | 0.5312 | 11.8508 | 10.7784  | PPARG    | Peroxisom PPARG    |
| cis-9,10-Epoxy stearic acid | TLR4_HUMAN  | 1.79E-07 | 0.2931 | 0.8793  | 11.6623  | TLR4     | Toll-like re TLR4  |
| cis-9,10-Epoxy stearic acid | VEGFA_HUMAN | 7.16E-10 | 0.2881 | 0.5763  | 15.9679  | VEGFA    | Vascular er VEGFA  |
| D-alpha-Aminobutyric acid   | ARGI1_HUMAN | 2.53E-52 | 0.3667 | 0.6561  | 92.1843  | ARG1     | Arginase-1 ARG1    |
| D-alpha-Aminobutyric acid   | GRIA1_HUMAN | 2.97E-46 | 0.4138 | 6.3313  | 81.285   | GRIA1    | Glutamate GRIA1    |
| D-alpha-Aminobutyric acid   | GSH1_HUMAN  | 2.84E-83 | 0.4667 | 1.3699  | 147.7485 | GCLC     | Glutamate- GSH1    |

|                           |             |          |        |         |          |         |              |       |
|---------------------------|-------------|----------|--------|---------|----------|---------|--------------|-------|
| D-alpha-Aminobutyric acid | NOS2_HUMAN  | 4.44E-16 | 0.4    | 8.439   | 27.0656  | NOS2    | Nitric oxide | NOS2  |
| D-alpha-Aminobutyric acid | NOS3_HUMAN  | 6.62E-11 | 0.4    | 3.3448  | 17.8252  | NOS3    | Nitric oxide | NOS3  |
| D-alpha-Aminobutyric acid | TY3H_HUMAN  | 9.31E-20 | 0.3143 | 0.3143  | 33.7164  | TH      | Tyrosine 3-  | TY3H  |
| D-Aspartic acid           | ARG1_HUMAN  | 2.53E-52 | 0.3667 | 0.6561  | 92.1843  | ARG1    | Arginase-1   | ARG1  |
| D-Aspartic acid           | GRIA1_HUMAN | 8.07E-47 | 0.4643 | 6.4097  | 82.3016  | GRIA1   | Glutamate r  | GRIA1 |
| D-Aspartic acid           | GSH1_HUMAN  | 7.75E-60 | 0.3333 | 0.9804  | 105.6727 | GCLC    | Glutamate-   | GSH1  |
| D-Aspartic acid           | NOS2_HUMAN  | 3.48E-14 | 0.3667 | 7.4473  | 23.7123  | NOS2    | Nitric oxide | NOS2  |
| D-Aspartic acid           | NOS3_HUMAN  | 2.21E-08 | 0.3548 | 2.5451  | 13.2959  | NOS3    | Nitric oxide | NOS3  |
| D-Aspartic acid           | TY3H_HUMAN  | 9.31E-20 | 0.3143 | 0.3143  | 33.7164  | TH      | Tyrosine 3-  | TY3H  |
| D-Glutamine               | ARG1_HUMAN  | 6.76E-60 | 0.4194 | 0.7527  | 105.7787 | ARG1    | Arginase-1   | ARG1  |
| D-Glutamine               | DCOR_HUMAN  | 1.32E-07 | 0.2812 | 0.2812  | 11.8986  | ODC1    | Ornithine d  | DCOR  |
| D-Glutamine               | GRIA1_HUMAN | 1.49E-26 | 0.3333 | 3.6009  | 45.9195  | GRIA1   | Glutamate r  | GRIA1 |
| D-Glutamine               | GSH1_HUMAN  | 1.5E-68  | 0.3824 | 1.1252  | 121.3166 | GCLC    | Glutamate-   | GSH1  |
| D-Glutamine               | GSTM1_HUMAN | 6.3E-36  | 0.3    | 0.583   | 62.7463  | GSTM1   | Glutathione  | GSTM1 |
| D-Glutamine               | GSTP1_HUMAN | 9.55E-15 | 0.3    | 2.0482  | 24.7232  | GSTP1   | Glutathione  | GSTP1 |
| D-Glutamine               | NOS2_HUMAN  | 2.22E-16 | 0.4667 | 8.6424  | 27.7534  | NOS2    | Nitric oxide | NOS2  |
| D-Glutamine               | NOS3_HUMAN  | 5.39E-10 | 0.4516 | 3.0559  | 16.1891  | NOS3    | Nitric oxide | NOS3  |
| D-Glutamine               | TY3H_HUMAN  | 2.9E-18  | 0.2895 | 0.2895  | 31.036   | TH      | Tyrosine 3-  | TY3H  |
| D-Serine                  | ARG1_HUMAN  | 6.27E-54 | 0.3793 | 0.6766  | 95.0662  | ARG1    | Arginase-1   | ARG1  |
| D-Serine                  | GRIA1_HUMAN | 1.98E-46 | 0.3793 | 6.3557  | 81.6014  | GRIA1   | Glutamate r  | GRIA1 |
| D-Serine                  | GSH1_HUMAN  | 1.21E-61 | 0.3438 | 1.0104  | 108.9161 | GCLC    | Glutamate-   | GSH1  |
| D-Serine                  | NOS2_HUMAN  | 3.22E-15 | 0.3793 | 7.9962  | 25.5681  | NOS2    | Nitric oxide | NOS2  |
| D-Serine                  | NOS3_HUMAN  | 1.63E-09 | 0.3667 | 2.9033  | 15.3249  | NOS3    | Nitric oxide | NOS3  |
| D-Serine                  | TY3H_HUMAN  | 2.59E-20 | 0.3235 | 0.3235  | 34.7149  | TH      | Tyrosine 3-  | TY3H  |
| Dalbergioidin             | CP1B1_HUMAN | 9.12E-08 | 0.3725 | 1.6611  | 12.1891  | CYP1B1  | Cytochrom    | CP1B1 |
| DL-Alanine                | GSH1_HUMAN  | 3.67E-52 | 0.2903 | 0.8528  | 91.8919  | GCLC    | Glutamate-   | GSH1  |
| DL-Alanine                | NOS2_HUMAN  | 3.67E-06 | 0.3103 | 3.1876  | 9.3084   | NOS2    | Nitric oxide | NOS2  |
| DL-Alanine                | XCT_HUMAN   | 7.35E-08 | 0.3077 | 0.3077  | 12.3576  | SLC7A11 | Cystine/glu  | XCT   |
| DL-Tyrosine               | ACE2_HUMAN  | 5.1E-45  | 0.4091 | 4.9979  | 79.069   | ACE2    | Angiotensin  | ACE2  |
| DL-Tyrosine               | ANF_HUMAN   | 1.43E-08 | 0.303  | 0.303   | 13.6347  | NPPA    | Natriuretic  | ANF   |
| DL-Tyrosine               | ARG1_HUMAN  | 1.8E-49  | 0.3243 | 0.6198  | 87.0644  | ARG1    | Arginase-1   | ARG1  |
| DL-Tyrosine               | CASP1_HUMAN | 4.9E-09  | 0.3654 | 4.4358  | 14.4688  | CASP1   | Caspase-1    | CASP1 |
| DL-Tyrosine               | ESR1_HUMAN  | 4.59E-09 | 0.5625 | 11.2731 | 14.5205  | ESR1    | Estrogen re  | ESR1  |
| DL-Tyrosine               | GRIA1_HUMAN | 5.21E-94 | 0.413  | 12.9506 | 167.0235 | GRIA1   | Glutamate r  | GRIA1 |
| DL-Tyrosine               | GSH1_HUMAN  | 6.74E-19 | 0.3    | 0.3     | 32.1732  | GCLC    | Glutamate-   | GSH1  |
| DL-Tyrosine               | GSTM1_HUMAN | 4.11E-19 | 0.3036 | 0.3036  | 32.559   | GSTM1   | Glutathione  | GSTM1 |
| DL-Tyrosine               | HMDH_HUMAN  | 3.42E-11 | 0.386  | 2.9714  | 18.3407  | HMGCR   | 3-hydroxy-   | HMDH  |

|                     |             |          |        |         |         |         |                    |
|---------------------|-------------|----------|--------|---------|---------|---------|--------------------|
| DL-Tyrosine         | IL1B_HUMAN  | 1.11E-16 | 0.3214 | 0.3214  | 28.5117 | IL1B    | Interleukin- IL1B  |
| DL-Tyrosine         | IL8_HUMAN   | 2.77E-06 | 0.4    | 0.4     | 9.528   | CXCL8   | Interleukin- IL8   |
| DL-Tyrosine         | MIF_HUMAN   | 2.1E-06  | 0.4048 | 1.3349  | 9.7454  | MIF     | Macrophag MIF      |
| DL-Tyrosine         | NOS2_HUMAN  | 3E-15    | 0.439  | 8.0108  | 25.6175 | NOS2    | Nitric oxid NOS2   |
| DL-Tyrosine         | NOS3_HUMAN  | 2.13E-07 | 0.4359 | 2.2329  | 11.5277 | NOS3    | Nitric oxid NOS3   |
| DL-Tyrosine         | PCNA_HUMAN  | 5.27E-56 | 0.5641 | 3.1746  | 98.7916 | PCNA    | Proliferatin PCNA  |
| DL-Tyrosine         | PPARA_HUMAN | 1.11E-16 | 0.359  | 20.0586 | 28.2586 | PPARA   | Peroxisom PPARA    |
| DL-Tyrosine         | PPARG_HUMAN | 1.64E-14 | 0.6    | 23.801  | 24.2957 | PPARG   | Peroxisom PPARG    |
| DL-Tyrosine         | THA_HUMAN   | 1.48E-07 | 0.4545 | 2.6851  | 11.8113 | THRA    | Thyroid ho THA     |
| DL-Tyrosine         | TY3H_HUMAN  | 3.06E-36 | 0.5882 | 0.5882  | 63.3098 | TH      | Tyrosine 3- TY3H   |
| DL-Tyrosine         | XCT_HUMAN   | 5.18E-08 | 0.3143 | 0.3143  | 12.6308 | SLC7A11 | Cystine/glu XCT    |
| Enol-phenylpyruvate | DOPO_HUMAN  | 3.01E-08 | 0.3077 | 0.3077  | 13.0529 | DBH     | Dopamine l DOPO    |
| Enol-phenylpyruvate | EST2_HUMAN  | 2.39E-21 | 0.3913 | 4.1115  | 36.5723 | CES2    | Cocaine est EST2   |
| Enol-phenylpyruvate | NF2L2_HUMAN | 4.77E-15 | 0.3462 | 1.7932  | 25.2655 | NFE2L2  | Nuclear fac NF2L2  |
| Enol-phenylpyruvate | NFKB1_HUMAN | 2.37E-07 | 0.2941 | 0.5844  | 11.4457 | NFKB1   | Nuclear fac NFKB1  |
| Enol-phenylpyruvate | TTHY_HUMAN  | 1.34E-06 | 0.3125 | 0.9001  | 10.0965 | TTR     | Transthyret TTHY   |
| Epicatechin         | CP1B1_HUMAN | 6.98E-10 | 0.4082 | 2.1419  | 15.9885 | CYP1B1  | Cytochrom CP1B1    |
| Epicatechin         | ESR1_HUMAN  | 6.45E-06 | 0.3269 | 7.4782  | 8.8683  | ESR1    | Estrogen re ESR1   |
| Epicatechin         | PPBT_HUMAN  | 0.002625 | 1      | 1       | 4.1825  | ALPL    | Alkaline pt PPBT   |
| Epicatechin         | VEGFA_HUMAN | 5.48E-26 | 0.5636 | 1.5903  | 44.9013 | VEGFA   | Vascular er VEGFA  |
| Ethyl caproate      | EST2_HUMAN  | 4.53E-32 | 0.5217 | 6.2253  | 55.822  | CES2    | Cocaine est EST2   |
| Ethyl caproate      | HMDH_HUMAN  | 1.82E-07 | 0.3871 | 1.9453  | 11.6491 | HMGCR   | 3-hydroxy- HMDH    |
| Ethyl caproate      | HYEP_HUMAN  | 5.81E-11 | 0.3871 | 3.0399  | 17.9269 | EPHX1   | Epoxide hy HYEP    |
| Ethyl caproate      | KPCA_HUMAN  | 1.84E-28 | 0.5152 | 19.0361 | 49.3426 | PRKCA   | Protein kin: KPCA  |
| Ethyl caproate      | KPCE_HUMAN  | 1.51E-08 | 0.5152 | 2.9309  | 13.5923 | PRKCE   | Protein kin: KPCE  |
| Ethyl caproate      | MPIP2_HUMAN | 6.33E-10 | 0.3265 | 3.0338  | 16.064  | CDC25B  | M-phase in MPIP2   |
| Ethyl caproate      | S22A2_HUMAN | 9.49E-06 | 0.3261 | 0.3261  | 8.5672  | SLC22A2 | Solute carri S22A2 |
| Ethyl caproate      | TNFA_HUMAN  | 5.61E-12 | 0.3864 | 5.895   | 19.7494 | TNF     | Tumor nec TNFA     |
| Ethyl caproate      | VEGFA_HUMAN | 6.58E-11 | 0.3208 | 0.6415  | 17.8294 | VEGFA   | Vascular er VEGFA  |
| Indole              | SC6A3_HUMAN | 3.42E-07 | 0.375  | 9.9072  | 11.1574 | SLC6A3  | Sodium-dej SC6A3   |
| Karanjin            | ABCG2_HUMAN | 1.6E-24  | 0.6591 | 11.8538 | 42.2719 | ABCG2   | Broad subs ABCG2   |
| Karanjin            | CP1A1_HUMAN | 1.33E-35 | 0.7045 | 3.411   | 62.1658 | CYP1A1  | Cytochrom CP1A1    |
| Karanjin            | CP1B1_HUMAN | 2.86E-30 | 0.3929 | 6.7737  | 52.5898 | CYP1B1  | Cytochrom CP1B1    |
| Karanjin            | CREB1_HUMAN | 1.88E-17 | 0.3333 | 0.3333  | 29.5772 | CREB1   | Cyclic AM CREB1    |
| Karanjin            | DCOR_HUMAN  | 1.37E-07 | 0.2807 | 0.2807  | 11.8747 | ODC1    | Ornithine d DCOR   |
| Karanjin            | MDR1_HUMAN  | 1.7E-07  | 0.4902 | 5.9527  | 11.7036 | ABCB1   | ATP-depen MDR1     |
| L-Aspartic acid     | ARGI1_HUMAN | 2.53E-52 | 0.3667 | 0.6561  | 92.1843 | ARG1    | Arginase-1 ARG1    |

|                 |             |          |        |         |          |        |                 |       |
|-----------------|-------------|----------|--------|---------|----------|--------|-----------------|-------|
| L-Aspartic acid | GRIA1_HUMAN | 8.07E-47 | 0.4643 | 6.4097  | 82.3016  | GRIA1  | Glutamate 1     | GRIA1 |
| L-Aspartic acid | GSH1_HUMAN  | 7.75E-60 | 0.3333 | 0.9804  | 105.6727 | GCLC   | Glutamate- GSH1 |       |
| L-Aspartic acid | NOS2_HUMAN  | 3.48E-14 | 0.3667 | 7.4473  | 23.7123  | NOS2   | Nitric oxide    | NOS2  |
| L-Aspartic acid | NOS3_HUMAN  | 2.21E-08 | 0.3548 | 2.5451  | 13.2959  | NOS3   | Nitric oxide    | NOS3  |
| L-Aspartic acid | TY3H_HUMAN  | 9.31E-20 | 0.3143 | 0.3143  | 33.7164  | TH     | Tyrosine 3-     | TY3H  |
| L-Citruline     | ARG11_HUMAN | 6.7E-67  | 0.4848 | 0.842   | 118.3531 | ARG1   | Arginase-1      | ARG11 |
| L-Citruline     | CFAB_HUMAN  | 3.79E-20 | 0.32   | 1.2229  | 34.4175  | CFB    | Compleme        | CFAB  |
| L-Citruline     | DCOR_HUMAN  | 2.08E-08 | 0.3143 | 0.3143  | 13.3407  | ODC1   | Ornithine d     | DCOR  |
| L-Citruline     | GRIA1_HUMAN | 2.33E-15 | 0.3243 | 2.0489  | 25.817   | GRIA1  | Glutamate 1     | GRIA1 |
| L-Citruline     | GSH1_HUMAN  | 5.16E-60 | 0.3333 | 0.9833  | 105.9904 | GCLC   | Glutamate- GSH1 |       |
| L-Citruline     | GSTM1_HUMAN | 1.45E-35 | 0.2963 | 0.577   | 62.0959  | GSTM1  | Glutathione     | GSTM1 |
| L-Citruline     | NOS2_HUMAN  | 3.42E-22 | 0.75   | 11.6989 | 38.0883  | NOS2   | Nitric oxide    | NOS2  |
| L-Citruline     | NOS3_HUMAN  | 1.43E-20 | 0.625  | 6.409   | 35.1793  | NOS3   | Nitric oxide    | NOS3  |
| L-Citruline     | TY3H_HUMAN  | 4.88E-18 | 0.2857 | 0.2857  | 30.6299  | TH     | Tyrosine 3-     | TY3H  |
| L-Epicatechin   | CP1B1_HUMAN | 6.98E-10 | 0.4082 | 2.1419  | 15.9885  | CYP1B1 | Cytochrom       | CP1B1 |
| L-Epicatechin   | ESR1_HUMAN  | 6.45E-06 | 0.3269 | 7.4782  | 8.8683   | ESR1   | Estrogen re     | ESR1  |
| L-Epicatechin   | PPBT_HUMAN  | 0.002625 | 1      | 1       | 4.1825   | ALPL   | Alkaline p      | PPBT  |
| L-Epicatechin   | VEGFA_HUMAN | 5.48E-26 | 0.5636 | 1.5903  | 44.9013  | VEGFA  | Vascular et     | VEGFA |
| L-Glutamic acid | ARG11_HUMAN | 1.11E-61 | 0.4333 | 0.7754  | 108.9821 | ARG1   | Arginase-1      | ARG11 |
| L-Glutamic acid | DCOR_HUMAN  | 7.96E-08 | 0.2903 | 0.2903  | 12.2946  | ODC1   | Ornithine d     | DCOR  |
| L-Glutamic acid | GRIA1_HUMAN | 1.22E-26 | 0.3438 | 3.6126  | 46.0714  | GRIA1  | Glutamate 1     | GRIA1 |
| L-Glutamic acid | GSH1_HUMAN  | 1.46E-70 | 0.3939 | 1.1586  | 124.9285 | GCLC   | Glutamate- GSH1 |       |
| L-Glutamic acid | GSTM1_HUMAN | 2.32E-41 | 0.34   | 0.6733  | 72.5026  | GSTM1  | Glutathione     | GSTM1 |
| L-Glutamic acid | GSTP1_HUMAN | 2.22E-16 | 0.3469 | 2.2739  | 27.5286  | GSTP1  | Glutathione     | GSTP1 |
| L-Glutamic acid | NOS2_HUMAN  | 7.77E-16 | 0.4333 | 8.3196  | 26.6617  | NOS2   | Nitric oxide    | NOS2  |
| L-Glutamic acid | NOS3_HUMAN  | 2.09E-09 | 0.4194 | 2.8692  | 15.1317  | NOS3   | Nitric oxide    | NOS3  |
| L-Glutamic acid | TY3H_HUMAN  | 9.8E-19  | 0.2973 | 0.2973  | 31.8812  | TH     | Tyrosine 3-     | TY3H  |
| L-Glutamine     | ARG11_HUMAN | 6.76E-60 | 0.4194 | 0.7527  | 105.7787 | ARG1   | Arginase-1      | ARG11 |
| L-Glutamine     | DCOR_HUMAN  | 1.32E-07 | 0.2812 | 0.2812  | 11.8986  | ODC1   | Ornithine d     | DCOR  |
| L-Glutamine     | GRIA1_HUMAN | 1.49E-26 | 0.3333 | 3.6009  | 45.9195  | GRIA1  | Glutamate 1     | GRIA1 |
| L-Glutamine     | GSH1_HUMAN  | 1.5E-68  | 0.3824 | 1.1252  | 121.3166 | GCLC   | Glutamate- GSH1 |       |
| L-Glutamine     | GSTM1_HUMAN | 6.3E-36  | 0.3    | 0.583   | 62.7463  | GSTM1  | Glutathione     | GSTM1 |
| L-Glutamine     | GSTP1_HUMAN | 9.55E-15 | 0.3    | 2.0482  | 24.7232  | GSTP1  | Glutathione     | GSTP1 |
| L-Glutamine     | NOS2_HUMAN  | 2.22E-16 | 0.4667 | 8.6424  | 27.7534  | NOS2   | Nitric oxide    | NOS2  |
| L-Glutamine     | NOS3_HUMAN  | 5.39E-10 | 0.4516 | 3.0559  | 16.1891  | NOS3   | Nitric oxide    | NOS3  |
| L-Glutamine     | TY3H_HUMAN  | 2.9E-18  | 0.2895 | 0.2895  | 31.036   | TH     | Tyrosine 3-     | TY3H  |
| L-Histidine     | ACE2_HUMAN  | 4.61E-09 | 0.3385 | 0.9506  | 14.5163  | ACE2   | Angiotensi      | ACE2  |

|                     |             |          |        |        |          |       |              |       |
|---------------------|-------------|----------|--------|--------|----------|-------|--------------|-------|
| L-Histidine         | ARG1_HUMAN  | 3.52E-47 | 0.2979 | 0.5906 | 82.9496  | ARG1  | Arginase-1   | ARG1  |
| L-Histidine         | CFAB_HUMAN  | 9.3E-18  | 0.381  | 1.0725 | 30.1266  | CFB   | Compleme     | CFAB  |
| L-Histidine         | GRIA1_HUMAN | 3.86E-58 | 0.3902 | 7.9788 | 102.625  | GRIA1 | Glutamate    | GRIA1 |
| L-Histidine         | PCNA_HUMAN  | 5.68E-11 | 0.3    | 0.5885 | 17.9442  | PCNA  | Proliferatin | PCNA  |
| L-Histidine         | TY3H_HUMAN  | 7.77E-22 | 0.3488 | 0.3488 | 37.4488  | TH    | Tyrosine 3-  | TY3H  |
| L-Homoglutamic acid | ARG1_HUMAN  | 1.1E-63  | 0.4062 | 0.801  | 112.5794 | ARG1  | Arginase-1   | ARG1  |
| L-Homoglutamic acid | DCOR_HUMAN  | 2.3E-08  | 0.3125 | 0.3125 | 13.2628  | ODC1  | Ornithine d  | DCOR  |
| L-Homoglutamic acid | GRIA1_HUMAN | 9.99E-16 | 0.3636 | 2.103  | 26.5183  | GRIA1 | Glutamate    | GRIA1 |
| L-Homoglutamic acid | GSH1_HUMAN  | 1.19E-66 | 0.3714 | 1.0937 | 117.9074 | GCLC  | Glutamate-   | GSH1  |
| L-Homoglutamic acid | GSTM1_HUMAN | 2.89E-38 | 0.32   | 0.6219 | 66.945   | GSTM1 | Glutathione  | GSTM1 |
| L-Homoglutamic acid | GSTP1_HUMAN | 6.99E-15 | 0.32   | 2.0675 | 24.963   | GSTP1 | Glutathione  | GSTP1 |
| L-Homoglutamic acid | NOS2_HUMAN  | 1.11E-15 | 0.5    | 8.2488 | 26.4223  | NOS2  | Nitric oxid  | NOS2  |
| L-Homoglutamic acid | NOS3_HUMAN  | 1.17E-09 | 0.4839 | 2.9492 | 15.5848  | NOS3  | Nitric oxid  | NOS3  |
| L-Homoglutamic acid | TY3H_HUMAN  | 8.1E-18  | 0.2821 | 0.2821 | 30.2342  | TH    | Tyrosine 3-  | TY3H  |
| L-Homoserine        | ARG1_HUMAN  | 1.41E-63 | 0.4483 | 0.7996 | 112.388  | ARG1  | Arginase-1   | ARG1  |
| L-Homoserine        | DCOR_HUMAN  | 4.63E-08 | 0.3    | 0.3    | 12.7171  | ODC1  | Ornithine d  | DCOR  |
| L-Homoserine        | GRIA1_HUMAN | 1.18E-43 | 0.3548 | 5.9711 | 76.6197  | GRIA1 | Glutamate    | GRIA1 |
| L-Homoserine        | GSH1_HUMAN  | 1.07E-72 | 0.4062 | 1.1941 | 128.7616 | GCLC  | Glutamate-   | GSH1  |
| L-Homoserine        | NOS2_HUMAN  | 2.22E-16 | 0.4483 | 8.5701 | 27.5088  | NOS2  | Nitric oxid  | NOS2  |
| L-Homoserine        | NOS3_HUMAN  | 1.13E-09 | 0.4333 | 2.9546 | 15.6153  | NOS3  | Nitric oxid  | NOS3  |
| L-Homoserine        | PCNA_HUMAN  | 1.64E-11 | 0.3171 | 0.6194 | 18.9114  | PCNA  | Proliferatin | PCNA  |
| L-Homoserine        | TY3H_HUMAN  | 3.12E-19 | 0.3056 | 0.3056 | 32.7733  | TH    | Tyrosine 3-  | TY3H  |
| L-Lysine            | ARG1_HUMAN  | 1.1E-63  | 0.4062 | 0.801  | 112.5794 | ARG1  | Arginase-1   | ARG1  |
| L-Lysine            | DCOR_HUMAN  | 1.15E-11 | 0.4483 | 0.4483 | 19.1898  | ODC1  | Ornithine d  | DCOR  |
| L-Lysine            | GRIA1_HUMAN | 7.36E-18 | 0.3636 | 2.3957 | 30.3093  | GRIA1 | Glutamate    | GRIA1 |
| L-Lysine            | GSH1_HUMAN  | 1.19E-66 | 0.3714 | 1.0937 | 117.9074 | GCLC  | Glutamate-   | GSH1  |
| L-Lysine            | NOS2_HUMAN  | 6.66E-16 | 0.5161 | 8.3435 | 26.7427  | NOS2  | Nitric oxid  | NOS2  |
| L-Lysine            | NOS3_HUMAN  | 1.17E-09 | 0.4839 | 2.9492 | 15.5848  | NOS3  | Nitric oxid  | NOS3  |
| L-Lysine            | TY3H_HUMAN  | 8.1E-18  | 0.2821 | 0.2821 | 30.2342  | TH    | Tyrosine 3-  | TY3H  |
| L-Methionine        | ARG1_HUMAN  | 1.26E-56 | 0.3939 | 0.711  | 99.9106  | ARG1  | Arginase-1   | ARG1  |
| L-Methionine        | DNMT1_HUMAN | 2.37E-06 | 0.2927 | 1.4279 | 9.6496   | DNMT1 | DNA (cyto    | DNMT1 |
| L-Methionine        | GRIA1_HUMAN | 1.58E-26 | 0.3529 | 3.5972 | 45.8717  | GRIA1 | Glutamate    | GRIA1 |
| L-Methionine        | GSH1_HUMAN  | 1.03E-71 | 0.4    | 1.1778 | 126.9953 | GCLC  | Glutamate-   | GSH1  |
| L-Methionine        | GSTM1_HUMAN | 1.01E-19 | 0.3137 | 0.3137 | 33.6559  | GSTM1 | Glutathione  | GSTM1 |
| L-Methionine        | GSTP1_HUMAN | 1.11E-06 | 0.3137 | 0.8829 | 10.2377  | GSTP1 | Glutathione  | GSTP1 |
| L-Methionine        | NOS2_HUMAN  | 3.33E-16 | 0.5152 | 8.497  | 27.2615  | NOS2  | Nitric oxid  | NOS2  |
| L-Methionine        | NOS3_HUMAN  | 1.03E-08 | 0.4706 | 2.6497 | 13.8883  | NOS3  | Nitric oxid  | NOS3  |



|                 |             |          |        |         |          |         |                   |
|-----------------|-------------|----------|--------|---------|----------|---------|-------------------|
| L-Phenylalanine | ACE2_HUMAN  | 1.69E-97 | 0.4    | 10.9052 | 173.289  | ACE2    | Angiotensin ACE2  |
| L-Phenylalanine | AKT2_HUMAN  | 7.25E-06 | 0.4043 | 4.0561  | 8.7771   | AKT2    | RAC-beta s AKT2   |
| L-Phenylalanine | AKT1_HUMAN  | 2.5E-07  | 0.4043 | 11.0569 | 11.4022  | AKT1    | RAC-alpha AKT1    |
| L-Phenylalanine | ANF_HUMAN   | 3.55E-09 | 0.3265 | 0.3265  | 14.7206  | NPPA    | Natriuretic ANF   |
| L-Phenylalanine | ARG1_HUMAN  | 4.98E-52 | 0.3429 | 0.6524  | 91.655   | ARG1    | Arginase-1 ARG1   |
| L-Phenylalanine | BAD_HUMAN   | 2.03E-07 | 0.3077 | 0.8895  | 11.5641  | BAD     | Bcl2-associ BAD   |
| L-Phenylalanine | CATB_HUMAN  | 7.6E-34  | 0.425  | 23.2695 | 59.009   | CTSB    | Cathepsin ICATB   |
| L-Phenylalanine | CATK_HUMAN  | 4.44E-16 | 0.4359 | 16.8699 | 27.0599  | CTSK    | Cathepsin ICATK   |
| L-Phenylalanine | CATL1_HUMAN | 6.12E-31 | 0.3902 | 28.4559 | 53.7923  | CTSL    | Cathepsin ICATL1  |
| L-Phenylalanine | CP2D6_HUMAN | 9.73E-08 | 0.4706 | 9.1383  | 12.1388  | CYP2D6  | Cytochrom CP2D6   |
| L-Phenylalanine | CP2CJ_HUMAN | 1.48E-06 | 0.4    | 14.0634 | 10.0175  | CYP2C19 | Cytochrom CP2CJ   |
| L-Phenylalanine | EST2_HUMAN  | 3.7E-24  | 0.3611 | 4.6655  | 41.6178  | CES2    | Cocaine est EST2  |
| L-Phenylalanine | GRIA1_HUMAN | 1.06E-62 | 0.4211 | 8.6113  | 110.8181 | GRIA1   | Glutamate r GRIA1 |
| L-Phenylalanine | GSH1_HUMAN  | 7.56E-20 | 0.3158 | 0.3158  | 33.8788  | GCLC    | Glutamate- GSH1   |
| L-Phenylalanine | GSTM1_HUMAN | 2.38E-18 | 0.2909 | 0.2909  | 31.1911  | GSTM1   | Glutathione GSTM1 |
| L-Phenylalanine | GSTP1_HUMAN | 9.7E-12  | 0.3529 | 1.6137  | 19.322   | GSTP1   | Glutathione GSTP1 |
| L-Phenylalanine | HMDH_HUMAN  | 1.55E-08 | 0.3509 | 2.2401  | 13.5713  | HMGCR   | 3-hydroxy- HMDH   |
| L-Phenylalanine | HYEP_HUMAN  | 2.79E-12 | 0.3714 | 3.4187  | 20.2929  | EPHX1   | Epoxide hy HYEP   |
| L-Phenylalanine | IL8_HUMAN   | 5.59E-10 | 0.3824 | 0.6644  | 16.162   | CXCL8   | Interleukin IL8   |
| L-Phenylalanine | ITB1_HUMAN  | 2.55E-06 | 0.3696 | 4.1837  | 9.5931   | ITGB1   | Integrin bet ITB1 |
| L-Phenylalanine | MMP2_HUMAN  | 3.67E-20 | 0.439  | 30.1542 | 34.4423  | MMP2    | 72 kDa typ MMP2   |
| L-Phenylalanine | MMP3_HUMAN  | 3.72E-20 | 0.4043 | 21.1013 | 34.432   | MMP3    | Stromelysin MMP3  |
| L-Phenylalanine | MMP9_HUMAN  | 1.76E-17 | 0.4103 | 21.5352 | 29.6308  | MMP9    | Matrix met MMP9   |
| L-Phenylalanine | MPIP2_HUMAN | 9.61E-06 | 0.3902 | 1.7085  | 8.5577   | CDC25B  | M-phase in MPIP2  |
| L-Phenylalanine | NOS3_HUMAN  | 1.23E-09 | 0.5429 | 2.943   | 15.5495  | NOS3    | Nitric oxide NOS3 |
| L-Phenylalanine | NOS2_HUMAN  | 2.11E-17 | 0.5429 | 9.1557  | 29.4888  | NOS2    | Nitric oxide NOS2 |
| L-Phenylalanine | PCNA_HUMAN  | 1.22E-15 | 0.439  | 0.8576  | 26.3589  | PCNA    | Proliferatin PCNA |
| L-Phenylalanine | PPARA_HUMAN | 2.89E-39 | 0.4444 | 46.6775 | 68.7388  | PPARA   | Peroxisom PPARA   |
| L-Phenylalanine | PPARG_HUMAN | 1.68E-34 | 0.6875 | 55.5308 | 60.1862  | PPARG   | Peroxisom PPARG   |
| L-Phenylalanine | SIR1_HUMAN  | 3.03E-10 | 0.3208 | 2.9782  | 16.6379  | SIRT1   | NAD-depe SIR1     |
| L-Phenylalanine | THA_HUMAN   | 2.78E-07 | 0.4186 | 2.5836  | 11.3189  | THRA    | Thyroid ho THA    |
| L-Phenylalanine | TY3H_HUMAN  | 1.06E-32 | 0.5294 | 0.5294  | 56.9554  | TH      | Tyrosine 3- TY3H  |
| L-Phenylalanine | VMAT2_HUMAN | 3.53E-10 | 0.3871 | 0.3871  | 16.5192  | SLC18A2 | Synaptic ve VMAT2 |
| L-Phenylalanine | XCT_HUMAN   | 1.88E-08 | 0.3333 | 0.3333  | 13.4199  | SLC7A11 | Cystine/glu XCT   |
| L-Serine        | ARG1_HUMAN  | 6.27E-54 | 0.3793 | 0.6766  | 95.0662  | ARG1    | Arginase-1 ARG1   |
| L-Serine        | GRIA1_HUMAN | 1.98E-46 | 0.3793 | 6.3557  | 81.6014  | GRIA1   | Glutamate r GRIA1 |
| L-Serine        | GSH1_HUMAN  | 1.21E-61 | 0.3438 | 1.0104  | 108.9161 | GCLC    | Glutamate- GSH1   |

|                     |             |          |        |         |          |         |                                                  |
|---------------------|-------------|----------|--------|---------|----------|---------|--------------------------------------------------|
| L-Serine            | NOS2_HUMAN  | 3.22E-15 | 0.3793 | 7.9962  | 25.5681  | NOS2    | Nitric oxide NOS2                                |
| L-Serine            | NOS3_HUMAN  | 1.63E-09 | 0.3667 | 2.9033  | 15.3249  | NOS3    | Nitric oxide NOS3                                |
| L-Serine            | TY3H_HUMAN  | 2.59E-20 | 0.3235 | 0.3235  | 34.7149  | TH      | Tyrosine 3- TY3H                                 |
| L-Tyrosine          | ACE2_HUMAN  | 5.1E-45  | 0.4091 | 4.9979  | 79.069   | ACE2    | Angiotensin ACE2                                 |
| L-Tyrosine          | ANF_HUMAN   | 1.43E-08 | 0.303  | 0.303   | 13.6347  | NPPA    | Natriuretic ANF                                  |
| L-Tyrosine          | ARG1_HUMAN  | 1.8E-49  | 0.3243 | 0.6198  | 87.0644  | ARG1    | Arginase-1 ARG1                                  |
| L-Tyrosine          | CASP1_HUMAN | 4.9E-09  | 0.3654 | 4.4358  | 14.4688  | CASP1   | Caspase-1 CASP1                                  |
| L-Tyrosine          | ESR1_HUMAN  | 4.59E-09 | 0.5625 | 11.2731 | 14.5205  | ESR1    | Estrogen receptor ESR1                           |
| L-Tyrosine          | GRIA1_HUMAN | 5.21E-94 | 0.413  | 12.9506 | 167.0235 | GRIA1   | Glutamate receptor GRIA1                         |
| L-Tyrosine          | GSH1_HUMAN  | 6.74E-19 | 0.3    | 0.3     | 32.1732  | GCLC    | Glutamate- GSH1                                  |
| L-Tyrosine          | GSTM1_HUMAN | 4.11E-19 | 0.3036 | 0.3036  | 32.559   | GSTM1   | Glutathione S-transferase GSTM1                  |
| L-Tyrosine          | HMDH_HUMAN  | 3.42E-11 | 0.386  | 2.9714  | 18.3407  | HMGCR   | 3-hydroxy- HMDH                                  |
| L-Tyrosine          | IL1B_HUMAN  | 1.11E-16 | 0.3214 | 0.3214  | 28.5117  | IL1B    | Interleukin-1 IL1B                               |
| L-Tyrosine          | IL8_HUMAN   | 2.77E-06 | 0.4    | 0.4     | 9.528    | CXCL8   | Interleukin-8 IL8                                |
| L-Tyrosine          | MIF_HUMAN   | 2.1E-06  | 0.4048 | 1.3349  | 9.7454   | MIF     | Macrophage inflammatory factor MIF               |
| L-Tyrosine          | NOS2_HUMAN  | 3E-15    | 0.439  | 8.0108  | 25.6175  | NOS2    | Nitric oxide NOS2                                |
| L-Tyrosine          | NOS3_HUMAN  | 2.13E-07 | 0.4359 | 2.2329  | 11.5277  | NOS3    | Nitric oxide NOS3                                |
| L-Tyrosine          | PCNA_HUMAN  | 5.27E-56 | 0.5641 | 3.1746  | 98.7916  | PCNA    | Proliferating cell nuclear antigen PCNA          |
| L-Tyrosine          | PPARA_HUMAN | 1.11E-16 | 0.359  | 20.0586 | 28.2586  | PPARA   | Peroxisome proliferator-activated receptor PPARA |
| L-Tyrosine          | PPARG_HUMAN | 1.64E-14 | 0.6    | 23.801  | 24.2957  | PPARG   | Peroxisome proliferator-activated receptor PPARG |
| L-Tyrosine          | THA_HUMAN   | 1.48E-07 | 0.4545 | 2.6851  | 11.8113  | THRA    | Thyroid hormone receptor THA                     |
| L-Tyrosine          | TY3H_HUMAN  | 3.06E-36 | 0.5882 | 0.5882  | 63.3098  | TH      | Tyrosine 3- TY3H                                 |
| L-Tyrosine          | XCT_HUMAN   | 5.18E-08 | 0.3143 | 0.3143  | 12.6308  | SLC7A11 | Cystine/glutamate transporter XCT                |
| Maltol              | DOPO_HUMAN  | 1.11E-16 | 0.3704 | 0.6561  | 28.2614  | DBH     | Dopamine transporter DOPO                        |
| Methyl anthranilate | AK1C3_HUMAN | 6E-15    | 0.3684 | 6.115   | 25.0892  | AKR1C3  | Aldo-keto reductase AK1C3                        |
| Methyl anthranilate | CP1A2_HUMAN | 1.53E-09 | 0.5    | 19.984  | 15.3765  | CYP1A2  | Cytochrome P450 CP1A2                            |
| Methyl anthranilate | CP2C9_HUMAN | 2.45E-06 | 0.4222 | 10.4377 | 9.6245   | CYP2C9  | Cytochrome P450 CP2C9                            |
| Methyl anthranilate | CP2CJ_HUMAN | 5.92E-08 | 0.5    | 16.7882 | 12.5259  | CYP2C19 | Cytochrome P450 CP2CJ                            |
| Methyl anthranilate | EST2_HUMAN  | 2.33E-14 | 0.3333 | 2.7335  | 24.0234  | CES2    | Cocaine esterase EST2                            |
| Methyl anthranilate | HDAC1_HUMAN | 8.17E-12 | 0.4103 | 20.4762 | 19.4559  | HDAC1   | Histone deacetylase HDAC1                        |
| Methyl anthranilate | HYEP_HUMAN  | 7.83E-09 | 0.3333 | 2.4278  | 14.1036  | EPHX1   | Epoxide hydrolase HYEP                           |
| Methyl anthranilate | PPBT_HUMAN  | 7.06E-06 | 0.3333 | 1.8648  | 8.7975   | ALPL    | Alkaline phosphatase PPBT                        |
| Miltirone           | EST2_HUMAN  | 1.03E-12 | 1      | 2.409   | 21.0688  | CES2    | Cocaine esterase EST2                            |
| Miltirone           | MPBP2_HUMAN | 1E-12    | 0.5283 | 3.9219  | 21.0938  | CDC25B  | M-phase promoting factor MPBP2                   |
| N6-Acetyl-L-lysine  | ARG1_HUMAN  | 1.87E-63 | 0.4571 | 0.7981  | 112.1662 | ARG1    | Arginase-1 ARG1                                  |
| N6-Acetyl-L-lysine  | CFAB_HUMAN  | 5.8E-21  | 0.3333 | 1.2742  | 35.881   | CFB     | Complement factor CFAB                           |
| N6-Acetyl-L-lysine  | DCOR_HUMAN  | 5.39E-08 | 0.2973 | 0.2973  | 12.5991  | ODC1    | Ornithine decarboxylase DCOR                     |

|                                |             |          |        |         |          |         |                 |       |
|--------------------------------|-------------|----------|--------|---------|----------|---------|-----------------|-------|
| N6-Acetyl-L-lysine             | GRIA1_HUMAN | 1.78E-11 | 0.3421 | 1.511   | 18.8494  | GRIA1   | Glutamate r     | GRIA1 |
| N6-Acetyl-L-lysine             | GSH1_HUMAN  | 5.35E-63 | 0.35   | 1.0329  | 111.3477 | GCLC    | Glutamate- GSH1 |       |
| N6-Acetyl-L-lysine             | GSTM1_HUMAN | 4.42E-37 | 0.3091 | 0.6022  | 64.8178  | GSTM1   | Glutathione     | GSTM1 |
| N6-Acetyl-L-lysine             | GSTP1_HUMAN | 6.53E-07 | 0.3091 | 0.9164  | 10.6546  | GSTP1   | Glutathione     | GSTP1 |
| N6-Acetyl-L-lysine             | HYEP_HUMAN  | 4.9E-09  | 0.3235 | 2.4862  | 14.4681  | EPHX1   | Epoxide hy      | HYEP  |
| N6-Acetyl-L-lysine             | NOS2_HUMAN  | 7.48E-22 | 0.5938 | 11.5183 | 37.4779  | NOS2    | Nitric oxide    | NOS2  |
| N6-Acetyl-L-lysine             | NOS3_HUMAN  | 2.28E-17 | 0.5882 | 5.3933  | 29.427   | NOS3    | Nitric oxide    | NOS3  |
| N6-Acetyl-L-lysine             | PCNA_HUMAN  | 6.34E-11 | 0.3    | 0.5857  | 17.8583  | PCNA    | Proliferatin    | PCNA  |
| N6-Acetyl-L-lysine             | SIR1_HUMAN  | 2.75E-54 | 0.4348 | 16.2619 | 95.7072  | SIRT1   | NAD-depe        | SIR1  |
| N6-Acetyl-L-lysine             | TY3H_HUMAN  | 6.65E-21 | 0.3333 | 0.3333  | 35.774   | TH      | Tyrosine 3-     | TY3H  |
| NG,NG-Dimethylarginine dihydro | ARG1_HUMAN  | 1.2E-49  | 0.3125 | 0.622   | 87.3805  | ARG1    | Arginase-1      | ARG1  |
| NG,NG-Dimethylarginine dihydro | GSH1_HUMAN  | 3.18E-59 | 0.3409 | 0.9702  | 104.5719 | GCLC    | Glutamate- GSH1 |       |
| NG,NG-Dimethylarginine dihydro | NOS2_HUMAN  | 2.44E-15 | 0.7647 | 8.0621  | 25.7912  | NOS2    | Nitric oxide    | NOS2  |
| NG,NG-Dimethylarginine dihydro | NOS3_HUMAN  | 2.68E-12 | 0.6471 | 3.7864  | 20.3262  | NOS3    | Nitric oxide    | NOS3  |
| Nicotinic acid                 | 5HT2A_HUMAN | 1.5E-06  | 0.4444 | 12.8538 | 10.0068  | HTR2A   | 5-hydroxyt      | 5HT2A |
| Nicotinic acid                 | 5HT2C_HUMAN | 1.14E-07 | 0.3617 | 12.1324 | 12.0152  | HTR2C   | 5-hydroxyt      | 5HT2C |
| Nicotinic acid                 | AK1C3_HUMAN | 1.36E-28 | 0.3871 | 11.7922 | 49.5813  | AKR1C3  | Aldo-keto r     | AK1C3 |
| Nicotinic acid                 | CCNA2_HUMAN | 1.51E-06 | 0.4444 | 3.9428  | 10.0024  | CCNA2   | Cyclin-A2       | CCNA2 |
| Nicotinic acid                 | CP17A_HUMAN | 5.69E-09 | 0.3333 | 4.3483  | 14.3523  | CYP17A1 | Steroid 17-     | CP17A |
| Nicotinic acid                 | CP19A_HUMAN | 7.4E-10  | 0.4688 | 10.0287 | 15.9427  | CYP19A1 | Aromatase       | CP19A |
| Nicotinic acid                 | CP1A2_HUMAN | 5.44E-08 | 0.4333 | 16.9448 | 12.5914  | CYP1A2  | Cytochrom       | CP1A2 |
| Nicotinic acid                 | CP1B1_HUMAN | 1.36E-46 | 0.5455 | 10.4822 | 81.8946  | CYP1B1  | Cytochrom       | CP1B1 |
| Nicotinic acid                 | CP2B6_HUMAN | 9.8E-19  | 0.2973 | 0.2973  | 31.8812  | CYP2B6  | Cytochrom       | CP2B6 |
| Nicotinic acid                 | CP2CJ_HUMAN | 4.05E-06 | 0.4524 | 13.2099 | 9.2317   | CYP2C19 | Cytochrom       | CP2CJ |
| Nicotinic acid                 | CP3A4_HUMAN | 9.11E-10 | 0.5625 | 18.0875 | 15.7805  | CYP3A4  | Cytochrom       | CP3A4 |
| Nicotinic acid                 | CYC_HUMAN   | 7.53E-39 | 0.3077 | 0.3077  | 67.9935  | CYCS    | Cytochrom       | CYC   |
| Nicotinic acid                 | ERN1_HUMAN  | 3.52E-06 | 0.3684 | 2.5673  | 9.3409   | ERN1    | Serine/thre     | ERN1  |
| Nicotinic acid                 | EST2_HUMAN  | 6.9E-31  | 0.4615 | 5.9921  | 53.6991  | CES2    | Cocaine est     | EST2  |
| Nicotinic acid                 | HDAC1_HUMAN | 8.94E-09 | 0.4722 | 15.4312 | 13.9997  | HDAC1   | Histone de      | HDAC1 |
| Nicotinic acid                 | HYEP_HUMAN  | 5.37E-08 | 0.36   | 2.1875  | 12.6025  | EPHX1   | Epoxide hy      | HYEP  |
| Nicotinic acid                 | LDLR_HUMAN  | 3.97E-19 | 0.3273 | 0.9496  | 32.5868  | LDLR    | Low-densit      | LDLR  |
| Nicotinic acid                 | NAMPT_HUMAN | 3.56E-20 | 0.4857 | 25.3316 | 34.4654  | NAMPT   | Nicotinami      | NAMPT |
| Nicotinic acid                 | RHOA_HUMAN  | 1.02E-06 | 0.3889 | 0.3889  | 10.3099  | RHOA    | Transformi      | RHOA  |
| Nicotinic acid                 | TTHY_HUMAN  | 8E-09    | 0.3243 | 1.2313  | 14.0868  | TTR     | Transthyret     | TTHY  |
| Nicotinic acid                 | XCT_HUMAN   | 9.41E-08 | 0.303  | 0.303   | 12.1645  | SLC7A11 | Cystine/glu     | XCT   |
| Okanin                         | A4_HUMAN    | 1.53E-36 | 0.5116 | 24.7697 | 63.8483  | APP     | Amyloid-b       | A4    |
| Okanin                         | ABCG2_HUMAN | 1.2E-29  | 0.4762 | 14.35   | 51.4697  | ABCG2   | Broad subs      | ABCG2 |

|            |             |          |        |         |          |          |                                                                      |
|------------|-------------|----------|--------|---------|----------|----------|----------------------------------------------------------------------|
| Okanin     | AOFA_HUMAN  | 5.26E-09 | 0.4884 | 7.3945  | 14.4128  | MAOA     | Amine oxidase AOFA                                                   |
| Okanin     | AOFB_HUMAN  | 1.56E-21 | 0.4884 | 25.2154 | 36.9056  | MAOB     | Amine oxidase AOFB                                                   |
| Okanin     | CH60_HUMAN  | 5.93E-13 | 0.4444 | 0.4444  | 21.5011  | HSPD1    | 60 kDa heat shock protein CH60                                       |
| Okanin     | CP1A1_HUMAN | 7.51E-23 | 0.3469 | 2.1668  | 39.2705  | CYP1A1   | Cytochrome P450 CP1A1                                                |
| Okanin     | CP1B1_HUMAN | 2.15E-30 | 0.3654 | 6.8021  | 52.8135  | CYP1B1   | Cytochrome P450 CP1B1                                                |
| Okanin     | DCOR_HUMAN  | 6.53E-21 | 0.4364 | 0.8285  | 35.7888  | ODC1     | Ornithine decarboxylase DCOR                                         |
| Okanin     | FOS_HUMAN   | 3.24E-07 | 0.3864 | 0.679   | 11.2015  | FOS      | Proto-oncogene FOS                                                   |
| Okanin     | JUN_HUMAN   | 2.74E-06 | 0.3696 | 1.2809  | 9.5367   | JUN      | Transcription factor JUN                                             |
| Okanin     | MMP2_HUMAN  | 2.12E-07 | 0.5882 | 11.4611 | 11.5306  | MMP2     | 72 kDa type 2 matrix metalloproteinase MMP2                          |
| Okanin     | MMP9_HUMAN  | 3.51E-09 | 0.5882 | 11.4771 | 14.7284  | MMP9     | Matrix metalloproteinase MMP9                                        |
| Okanin     | NF2L2_HUMAN | 2.65E-09 | 0.4048 | 1.08    | 14.9468  | NFE2L2   | Nuclear factor of erythroid 2-like 2 NF2L2                           |
| Okanin     | NFKB1_HUMAN | 1.62E-20 | 0.3864 | 1.7346  | 35.0811  | NFKB1    | Nuclear factor kappa-light-chain-enhancer of activated T cells NFKB1 |
| Okanin     | NQO1_HUMAN  | 5.91E-06 | 0.3077 | 0.8847  | 8.9362   | NQO1     | NAD(P)H dehydrogenase NQO1                                           |
| Okanin     | NR0B2_HUMAN | 2.49E-32 | 0.3214 | 0.6318  | 56.2902  | NR0B2    | Nuclear receptor subfamily 0 class B member 2 NR0B2                  |
| Okanin     | SDF1_HUMAN  | 7.5E-118 | 0.5641 | 6.5042  | 209.8232 | CXCL12   | Stromal cell derived factor 1 SDF1                                   |
| Okanin     | SYUA_HUMAN  | 6.42E-10 | 0.6486 | 2.2462  | 16.0537  | SNCA     | Alpha-synuclein SYUA                                                 |
| Okanin     | TF65_HUMAN  | 8.88E-07 | 0.4    | 1.0675  | 10.4141  | RELA     | Transcription factor NF-kappa-B p50 subunit TF65                     |
| Okanin     | TNR1A_HUMAN | 3.74E-19 | 0.4    | 2.8128  | 32.6323  | TNFRSF1A | Tumor necrosis factor receptor type 1 TNR1A                          |
| Okanin     | TTHY_HUMAN  | 3.61E-10 | 0.4255 | 1.4317  | 16.5018  | TTR      | Transthyretin TTHY                                                   |
| Oleamide   | CNR1_HUMAN  | 1.82E-14 | 0.7778 | 28.3219 | 24.2189  | CNR1     | Cannabinoid receptor 1 CNR1                                          |
| Oleamide   | EST2_HUMAN  | 3.17E-34 | 0.5    | 6.6501  | 59.6913  | CES2     | Cocaine esterase EST2                                                |
| Oleamide   | HMDH_HUMAN  | 1.13E-11 | 0.4737 | 3.1034  | 19.2018  | HMGCR    | 3-hydroxy-3-methylglutaryl-CoA lyase HMDH                            |
| Oleamide   | HYEP_HUMAN  | 3.93E-12 | 0.3824 | 3.3761  | 20.0271  | EPHX1    | Epoxide hydrolase HYEP                                               |
| Oleamide   | KPCA_HUMAN  | 5.89E-23 | 0.5128 | 15.3475 | 39.4592  | PRKCA    | Protein kinase C alpha KPCA                                          |
| Oleamide   | KPCE_HUMAN  | 1.07E-06 | 0.359  | 2.2723  | 10.2709  | PRKCE    | Protein kinase C epsilon KPCE                                        |
| Oleamide   | MGLL_HUMAN  | 1.19E-06 | 0.4571 | 2.1877  | 10.1833  | MGLL     | Monoglyceride lipase MGLL                                            |
| Oleamide   | MPIP2_HUMAN | 1.14E-09 | 0.45   | 2.9527  | 15.6047  | CDC25B   | M-phase promoting factor MPIP2                                       |
| Oleic acid | CNR1_HUMAN  | 1.12E-14 | 0.5714 | 28.7126 | 24.5926  | CNR1     | Cannabinoid receptor 1 CNR1                                          |
| Oleic acid | EST2_HUMAN  | 4.13E-36 | 0.5    | 7.0218  | 63.0756  | CES2     | Cocaine esterase EST2                                                |
| Oleic acid | GSTM1_HUMAN | 5.19E-19 | 0.3019 | 0.3019  | 32.377   | GSTM1    | Glutathione S-transferase mu 1 GSTM1                                 |
| Oleic acid | HMDH_HUMAN  | 1.07E-17 | 0.6471 | 4.7619  | 30.0178  | HMGCR    | 3-hydroxy-3-methylglutaryl-CoA lyase HMDH                            |
| Oleic acid | HYEP_HUMAN  | 8.88E-16 | 0.3548 | 4.4244  | 26.5754  | EPHX1    | Epoxide hydrolase HYEP                                               |
| Oleic acid | KPCA_HUMAN  | 7.84E-23 | 0.475  | 15.2644 | 39.2366  | PRKCA    | Protein kinase C alpha KPCA                                          |
| Oleic acid | KPCE_HUMAN  | 1.33E-06 | 0.339  | 2.2383  | 10.0996  | PRKCE    | Protein kinase C epsilon KPCE                                        |
| Oleic acid | MGLL_HUMAN  | 1.19E-06 | 0.4571 | 2.1877  | 10.1833  | MGLL     | Monoglyceride lipase MGLL                                            |
| Oleic acid | MPIP2_HUMAN | 4.73E-12 | 0.5676 | 3.7079  | 19.8816  | CDC25B   | M-phase promoting factor MPIP2                                       |
| Oleic acid | PPARA_HUMAN | 2.3E-09  | 1      | 11.3778 | 15.0575  | PPARA    | Peroxisome proliferator-activated receptor alpha PPARA               |

|                 |             |          |        |         |         |         |                   |
|-----------------|-------------|----------|--------|---------|---------|---------|-------------------|
| Oleic acid      | PPARG_HUMAN | 5.19E-10 | 1      | 16.6614 | 16.2199 | PPARG   | Peroxisome PPARG  |
| p-Aminobenzoate | EST2_HUMAN  | 6.98E-19 | 0.3333 | 3.6254  | 32.1459 | CES2    | Cocaine estEST2   |
| p-Aminobenzoate | XCT_HUMAN   | 1.85E-07 | 0.2903 | 0.2903  | 11.638  | SLC7A11 | Cystine/gluXCT    |
| p-Octopamine    | ADRB2_HUMAN | 2.39E-06 | 0.5926 | 6.2756  | 9.6425  | ADRB2   | Beta-2 adreADRB2  |
| p-Octopamine    | ESR1_HUMAN  | 1.52E-09 | 0.4    | 11.8512 | 15.3815 | ESR1    | Estrogen reESR1   |
| Phenethylamine  | AL1A1_HUMAN | 1.18E-08 | 0.3235 | 0.9368  | 13.7824 | ALDH1A1 | Retinal dehAL1A1  |
| Phenethylamine  | AOFA_HUMAN  | 4.27E-07 | 0.5217 | 5.836   | 10.9859 | MAOA    | Amine oxicAOFA    |
| Phenethylamine  | AOFB_HUMAN  | 9.4E-14  | 0.5652 | 16.2131 | 22.9366 | MAOB    | Amine oxicAOFB    |
| Phenethylamine  | HMOX1_HUMAN | 1.44E-23 | 0.2895 | 0.2895  | 40.5557 | HMOX1   | Heme oxygHMOX1    |
| Phenethylamine  | HRH1_HUMAN  | 9.04E-06 | 0.4167 | 5.1625  | 8.6051  | HRH1    | Histamine lHRH1   |
| Phenethylamine  | LIPL_HUMAN  | 1.8E-19  | 0.3095 | 0.3095  | 33.202  | LPL     | LipoproteirLIPL   |
| Phenethylamine  | MIF_HUMAN   | 5.91E-11 | 0.4615 | 2.3561  | 17.9131 | MIF     | MacrophagMIF      |
| Phenethylamine  | PERM_HUMAN  | 2.46E-08 | 0.3667 | 1.9778  | 13.2094 | MPO     | Myelopero:PERM    |
| Phenethylamine  | S22A1_HUMAN | 1.12E-06 | 0.4483 | 0.4483  | 10.231  | SLC22A1 | Solute carriS22A1 |
| Phenethylamine  | VMAT2_HUMAN | 1.11E-16 | 0.3438 | 0.6652  | 28.6583 | SLC18A2 | Synaptic veVMAT2  |
| Phloretic acid  | ACE2_HUMAN  | 3.27E-06 | 0.3409 | 0.6298  | 9.399   | ACE2    | AngiotensinACE2   |
| Phloretic acid  | CASP1_HUMAN | 1.73E-07 | 0.3265 | 3.6608  | 11.6918 | CASP1   | Caspase-1 CASP1   |
| Phloretic acid  | DOPO_HUMAN  | 8.35E-08 | 0.2895 | 0.2895  | 12.2576 | DBH     | Dopamine lDOPO    |
| Phloretic acid  | ESR1_HUMAN  | 2.33E-15 | 0.5909 | 18.8622 | 25.8238 | ESR1    | Estrogen reESR1   |
| Phloretic acid  | EST2_HUMAN  | 4.91E-07 | 0.3929 | 1.2898  | 10.8763 | CES2    | Cocaine estEST2   |
| Phloretic acid  | GRIA1_HUMAN | 1.88E-26 | 0.3725 | 3.5866  | 45.7343 | GRIA1   | Glutamate lGRIA1  |
| Phloretic acid  | GSHR_HUMAN  | 2.64E-14 | 0.2927 | 1.1499  | 23.9265 | GSR     | GlutathioneGSHR   |
| Phloretic acid  | HMOX1_HUMAN | 9.89E-26 | 0.3171 | 0.3171  | 44.4419 | HMOX1   | Heme oxygHMOX1    |
| Phloretic acid  | HS71A_HUMAN | 3.29E-06 | 0.3043 | 0.3043  | 9.3946  | HSPA1A  | Heat shockHS71A   |
| Phloretic acid  | IL1B_HUMAN  | 2.44E-15 | 0.2909 | 0.2909  | 25.7799 | IL1B    | InterleukinIL1B   |
| Phloretic acid  | MGLL_HUMAN  | 5.09E-06 | 0.4118 | 1.9699  | 9.053   | MGLL    | MonoglyceMGLL     |
| Phloretic acid  | MMP13_HUMAN | 1.77E-09 | 0.4375 | 12.7912 | 15.2618 | MMP13   | CollagenasMMP13   |
| Phloretic acid  | MMP3_HUMAN  | 2.13E-06 | 0.4375 | 6.834   | 9.7342  | MMP3    | StromelysinMMP3   |
| Phloretic acid  | MMP2_HUMAN  | 1.22E-08 | 0.4375 | 13.2794 | 13.7592 | MMP2    | 72 kDa typMMP2    |
| Phloretic acid  | PCNA_HUMAN  | 1.11E-21 | 0.3261 | 1.2034  | 37.1696 | PCNA    | ProliferatinPCNA  |
| Phloretic acid  | RHOA_HUMAN  | 4.38E-06 | 0.3478 | 0.3478  | 9.1704  | RHOA    | TransformiRHOA    |
| Phloretic acid  | THA_HUMAN   | 5.25E-26 | 0.425  | 9.5135  | 44.9352 | THRA    | Thyroid hoTHA     |
| Phyllalbine     | A4_HUMAN    | 2.07E-12 | 0.3529 | 8.3922  | 20.5254 | APP     | Amyloid-bA4       |
| Phyllalbine     | DCOR_HUMAN  | 1.03E-07 | 0.2857 | 0.2857  | 12.0935 | ODC1    | Ornithine dDCOR   |
| Phyllalbine     | FOS_HUMAN   | 3.2E-07  | 0.34   | 0.6796  | 11.2115 | FOS     | Proto-oncoFOS     |
| Phyllalbine     | JUN_HUMAN   | 8.27E-08 | 0.3519 | 1.615   | 12.265  | JUN     | TranscriptiJUN    |
| Phyllalbine     | MDR1_HUMAN  | 1.12E-13 | 0.4062 | 10.8389 | 22.8003 | ABCB1   | ATP-depenMDR1     |

|                     |             |          |        |         |          |          |              |       |
|---------------------|-------------|----------|--------|---------|----------|----------|--------------|-------|
| Phyllalbine         | MRP1_HUMAN  | 1.25E-06 | 0.2951 | 1.7363  | 10.1468  | ABCC1    | Multidrug r  | MRP1  |
| Phyllalbine         | NF2L2_HUMAN | 1.17E-08 | 0.3529 | 1.0003  | 13.7927  | NFE2L2   | Nuclear fac  | NF2L2 |
| Phyllalbine         | NFKB1_HUMAN | 1.44E-15 | 0.3519 | 1.3029  | 26.2114  | NFKB1    | Nuclear fac  | NFKB1 |
| Phyllalbine         | PAI1_HUMAN  | 2.48E-06 | 0.383  | 1.3904  | 9.6136   | SERPINE1 | Plasminoge   | PAI1  |
| Phyllalbine         | PDE4B_HUMAN | 6.24E-10 | 0.4355 | 8.0586  | 16.0756  | PDE4B    | cAMP-spec    | PDE4B |
| Phyllalbine         | SC6A3_HUMAN | 1.17E-25 | 0.3898 | 34.1747 | 44.3081  | SLC6A3   | Sodium-dej   | SC6A3 |
| Phyllalbine         | SC6A4_HUMAN | 1.53E-14 | 0.4545 | 28.1303 | 24.3534  | SLC6A4   | Sodium-dej   | SC6A4 |
| Phyllalbine         | SDF1_HUMAN  | 9.61E-91 | 0.3621 | 4.9989  | 161.1593 | CXCL12   | Stromal cel  | SDF1  |
| Protocatechuic acid | A4_HUMAN    | 6.57E-10 | 0.4348 | 6.6948  | 16.0354  | APP      | Amyloid-b    | A4    |
| Protocatechuic acid | AK1C3_HUMAN | 3.81E-47 | 0.4231 | 19.5124 | 82.8873  | AKR1C3   | Aldo-keto r  | AK1C3 |
| Protocatechuic acid | CH60_HUMAN  | 2.58E-11 | 0.3846 | 0.3846  | 18.5589  | HSPD1    | 60 kDa hea   | CH60  |
| Protocatechuic acid | CYC_HUMAN   | 1.33E-36 | 0.2895 | 0.2895  | 63.9581  | CYCS     | Cytochrom    | CYC   |
| Protocatechuic acid | DOPO_HUMAN  | 3.01E-08 | 0.3077 | 0.3077  | 13.0529  | DBH      | Dopamine     | DOPO  |
| Protocatechuic acid | ERN1_HUMAN  | 3.33E-16 | 0.4688 | 6.8791  | 27.2433  | ERN1     | Serine/thre  | ERN1  |
| Protocatechuic acid | EST2_HUMAN  | 1.34E-31 | 0.44   | 6.1324  | 54.9761  | CES2     | Cocaine est  | EST2  |
| Protocatechuic acid | HS71A_HUMAN | 4.75E-06 | 0.2955 | 0.2955  | 9.1071   | HSPA1A   | Heat shock   | HS71A |
| Protocatechuic acid | IBP3_HUMAN  | 2.17E-71 | 0.4722 | 6.2849  | 126.4145 | IGFBP3   | Insulin-like | IBP3  |
| Protocatechuic acid | IBP5_HUMAN  | 9.38E-83 | 0.4722 | 2.7932  | 146.816  | IGFBP5   | Insulin-like | IBP5  |
| Protocatechuic acid | MPIP2_HUMAN | 2.07E-06 | 0.3514 | 1.9201  | 9.7564   | CDC25B   | M-phase in   | MPIP2 |
| Protocatechuic acid | NR4A1_HUMAN | 9.76E-09 | 0.3529 | 1.0202  | 13.9314  | NR4A1    | Nuclear rec  | NR4A1 |
| Protocatechuic acid | NR4A2_HUMAN | 3.45E-07 | 0.2927 | 0.2927  | 11.1523  | NR4A2    | Nuclear rec  | NR4A2 |
| Protocatechuic acid | PAI1_HUMAN  | 6.25E-14 | 0.3667 | 3.1849  | 23.2556  | SERPINE1 | Plasminoge   | PAI1  |
| Protocatechuic acid | PPBT_HUMAN  | 3.66E-19 | 0.4167 | 6.3344  | 32.6503  | ALPL     | Alkaline p   | PPBT  |
| Protocatechuic acid | RARA_HUMAN  | 6.71E-43 | 0.4324 | 10.7337 | 75.2647  | RARA     | Retinoic ac  | RARA  |
| Protocatechuic acid | RHOA_HUMAN  | 7.33E-06 | 0.3333 | 0.3333  | 8.7683   | RHOA     | Transformi   | RHOA  |
| Protocatechuic acid | SDF1_HUMAN  | 1.42E-19 | 0.3889 | 1.0465  | 33.3867  | CXCL12   | Stromal cel  | SDF1  |
| Protocatechuic acid | SYUA_HUMAN  | 2.73E-25 | 0.4839 | 5.89    | 43.6512  | SNCA     | Alpha-synu   | SYUA  |
| Protocatechuic acid | TTHY_HUMAN  | 8.97E-29 | 0.5161 | 4.2036  | 49.9034  | TTR      | Transthyre   | TTHY  |
| Protocatechuic acid | TY3H_HUMAN  | 2.9E-18  | 0.2895 | 0.2895  | 31.036   | TH       | Tyrosine 3-  | TY3H  |
| Protocatechuic acid | XCT_HUMAN   | 3.2E-09  | 0.3667 | 0.3667  | 14.8008  | SLC7A11  | Cystine/glu  | XCT   |
| Syringic acid       | A4_HUMAN    | 4.98E-10 | 0.3846 | 6.7767  | 16.252   | APP      | Amyloid-b    | A4    |
| Syringic acid       | ABCG2_HUMAN | 2.31E-14 | 0.3684 | 6.9034  | 24.0318  | ABCG2    | Broad subs   | ABCG2 |
| Syringic acid       | AK1C3_HUMAN | 2.66E-26 | 0.4    | 10.8381 | 45.4652  | AKR1C3   | Aldo-keto r  | AK1C3 |
| Syringic acid       | CP1A1_HUMAN | 1.09E-09 | 0.2955 | 0.8826  | 15.6409  | CYP1A1   | Cytochrom    | CP1A1 |
| Syringic acid       | CP1B1_HUMAN | 3.42E-08 | 0.2979 | 1.7578  | 12.9532  | CYP1B1   | Cytochrom    | CP1B1 |
| Syringic acid       | ERN1_HUMAN  | 2.42E-77 | 0.5    | 33.338  | 137.0993 | ERN1     | Serine/thre  | ERN1  |
| Syringic acid       | EST2_HUMAN  | 2.34E-10 | 0.359  | 1.9447  | 16.8402  | CES2     | Cocaine est  | EST2  |

|                            |             |          |        |         |          |         |              |
|----------------------------|-------------|----------|--------|---------|----------|---------|--------------|
| Syringic acid              | FABP4_HUMAN | 5.72E-09 | 0.3333 | 2.2267  | 14.3476  | FABP4   | Fatty acid-b |
| Syringic acid              | FOS_HUMAN   | 1.37E-06 | 0.325  | 0.6145  | 10.0776  | FOS     | Proto-onco   |
| Syringic acid              | HMDH_HUMAN  | 2.65E-06 | 0.3714 | 1.6254  | 9.5628   | HMGCR   | 3-hydroxy-   |
| Syringic acid              | IBP3_HUMAN  | 1.12E-12 | 0.3673 | 1.0678  | 21.0039  | IGFBP3  | Insulin-like |
| Syringic acid              | JUN_HUMAN   | 7.86E-09 | 0.3488 | 1.8399  | 14.1008  | JUN     | Transcripti  |
| Syringic acid              | MDR1_HUMAN  | 5.61E-07 | 0.3415 | 5.5429  | 10.7729  | ABCB1   | ATP-depen    |
| Syringic acid              | NF2L2_HUMAN | 3.37E-20 | 0.4324 | 2.432   | 34.5091  | NFE2L2  | Nuclear fac  |
| Syringic acid              | NFKB1_HUMAN | 1.94E-21 | 0.325  | 1.815   | 36.7349  | NFKB1   | Nuclear fac  |
| Syringic acid              | RARA_HUMAN  | 3.23E-11 | 0.3902 | 2.7274  | 18.3846  | RARA    | Retinoic ac  |
| Syringic acid              | SDF1_HUMAN  | 1.55E-58 | 0.4146 | 3.2103  | 103.3389 | CXCL12  | Stromal cel  |
| Syringic acid              | TNR1A_HUMAN | 3.7E-39  | 0.375  | 5.8385  | 68.5483  | TNFRSF1 | Tumor necr   |
| Syringic acid              | TTHY_HUMAN  | 5.55E-16 | 0.4359 | 2.3032  | 27.0032  | TTR     | Transthyret  |
| Taxifolin                  | CP1B1_HUMAN | 9.33E-11 | 0.449  | 2.3404  | 17.557   | CYP1B1  | Cytochrom    |
| Taxifolin                  | CP2C8_HUMAN | 1.72E-07 | 0.3208 | 0.3208  | 11.6924  | CYP2C8  | Cytochrom    |
| Taxifolin                  | ESR1_HUMAN  | 1.39E-06 | 0.4194 | 8.2802  | 10.0628  | ESR1    | Estrogen re  |
| Taxifolin                  | MRP2_HUMAN  | 4.44E-15 | 0.303  | 0.5887  | 25.3218  | ABCC2   | Canalicular  |
| Taxifolin                  | VEGFA_HUMAN | 2.96E-17 | 0.375  | 1.0409  | 29.2241  | VEGFA   | Vascular er  |
| Trigonelline               | EST2_HUMAN  | 1.13E-30 | 0.3571 | 5.9497  | 53.3124  | CES2    | Cocaine est  |
| Trimethoprim               | CDN1A_HUMAN | 9.88E-09 | 0.2903 | 0.2903  | 13.9218  | CDKN1A  | Cyclin-dep   |
| Trimethoprim               | IBP5_HUMAN  | 8.86E-10 | 0.3065 | 0.3065  | 15.8021  | IGFBP5  | Insulin-like |
| Trimethoprim               | TNR1A_HUMAN | 7.88E-11 | 0.3396 | 1.5539  | 17.6889  | TNFRSF1 | Tumor necr   |
| Vestitol                   | CP1B1_HUMAN | 2.34E-08 | 0.3621 | 1.7955  | 13.2508  | CYP1B1  | Cytochrom    |
| Vestitol                   | DRD1_HUMAN  | 7.37E-09 | 0.3448 | 6.4331  | 14.151   | DRD1    | D(1A) dop    |
| Vestitol                   | ESR1_HUMAN  | 1.09E-08 | 0.3396 | 10.8186 | 13.8435  | ESR1    | Estrogen re  |
| Wighteone                  | ABCG2_HUMAN | 4.72E-08 | 0.5862 | 3.8285  | 12.702   | ABCG2   | Broad subs   |
| Wighteone                  | CP1A1_HUMAN | 7.3E-07  | 0.3235 | 0.6069  | 10.5676  | CYP1A1  | Cytochrom    |
| Wighteone                  | CP1B1_HUMAN | 1.16E-09 | 0.4727 | 2.0921  | 15.5949  | CYP1B1  | Cytochrom    |
| Wighteone                  | CP2C8_HUMAN | 1.05E-06 | 0.2833 | 0.2833  | 10.2806  | CYP2C8  | Cytochrom    |
| Wighteone                  | HIF1A_HUMAN | 3.07E-10 | 0.3636 | 2.2501  | 16.6282  | HIF1A   | Hypoxia-in   |
| Wighteone                  | IL2_HUMAN   | 1.66E-25 | 0.4286 | 1.4695  | 44.0383  | IL2     | Interleukin  |
| Wighteone                  | PON1_HUMAN  | 8.6E-19  | 0.2982 | 0.2982  | 31.9836  | PON1    | Serum para   |
| Wighteone                  | TF65_HUMAN  | 1.71E-07 | 0.4483 | 1.1899  | 11.7002  | RELA    | Transcripti  |
| Adenosine 5'-monophosphate | ASNS_HUMAN  | 2.6E-120 | 0.6825 | 1.9856  | 214.2572 | ASNS    | Asparagine   |
| Adenosine 5'-monophosphate | BIP_HUMAN   | 3.6E-127 | 0.8462 | 5.4782  | 226.5629 | HSPA5   | Endoplasm    |
| Adenosine 5'-monophosphate | DNMT1_HUMAN | 7.49E-34 | 0.5645 | 8.0678  | 59.0214  | DNMT1   | DNA (cyto    |
| Adenosine 5'-monophosphate | EZH2_HUMAN  | 1.9E-09  | 0.5645 | 3.5172  | 15.2087  | EZH2    | Histone-lys  |
| Adenosine 5'-monophosphate | HS71A_HUMAN | 1.11E-15 | 0.8302 | 0.8302  | 26.3939  | HSPA1A  | Heat shock   |

|                                  |             |          |        |        |          |        |                    |
|----------------------------------|-------------|----------|--------|--------|----------|--------|--------------------|
| Adenosine 5'-monophosphate       | HSP7C_HUMAN | 3.34E-68 | 0.8462 | 4.7168 | 120.6906 | HSPA8  | Heat shock HSP7C   |
| Adenosine 5'-monophosphate       | KAPCA_HUMAN | 3.33E-16 | 0.5    | 7.0395 | 27.4291  | PRKACA | cAMP-dep KAPCA     |
| Adenosine 5'-monophosphate       | RAC1_HUMAN  | 1.27E-18 | 0.5625 | 0.5625 | 31.6769  | RAC1   | Ras-related RAC1   |
| AICAR                            | ASNS_HUMAN  | 1.5E-57  | 0.3158 | 0.9424 | 101.5674 | ASNS   | Asparagine ASNS    |
| AICAR                            | BIP_HUMAN   | 6.6E-50  | 0.4259 | 2.1298 | 87.8449  | HSPA5  | Endoplasm BIP      |
| AICAR                            | DNMT1_HUMAN | 1.44E-26 | 0.587  | 6.3092 | 45.9451  | DNMT1  | DNA (cyto DNMT1    |
| AICAR                            | HS71A_HUMAN | 4.22E-07 | 0.3538 | 0.3538 | 10.9948  | HSPA1A | Heat shock HS71A   |
| AICAR                            | HSP7C_HUMAN | 4.34E-58 | 0.5385 | 4.0101 | 102.5343 | HSPA8  | Heat shock HSP7C   |
| AICAR                            | RAC1_HUMAN  | 3.8E-12  | 0.3582 | 0.3582 | 20.0528  | RAC1   | Ras-related RAC1   |
| alpha-D-Glucose                  | BIP_HUMAN   | 1.41E-07 | 0.2955 | 0.2955 | 11.8506  | HSPA5  | Endoplasm BIP      |
| alpha-D-Glucose                  | FGF2_HUMAN  | 8.28E-23 | 0.3659 | 1.0032 | 39.1942  | FGF2   | Fibroblast FGF2    |
| alpha-D-Glucose                  | IL6_HUMAN   | 2.79E-07 | 0.2826 | 0.2826 | 11.3184  | IL6    | Interleukin IL6    |
| alpha-D-Glucose                  | VEGFA_HUMAN | 1.11E-16 | 0.3659 | 1.0032 | 28.148   | VEGFA  | Vascular en VEGFA  |
| alpha-Tocopherol                 | CHLE_HUMAN  | 5.84E-07 | 0.3247 | 6.8118 | 10.7413  | BCHE   | Cholinester CHLE   |
| Beta-D-Fructose 2-phosphate      | ITPR1_HUMAN | 3.5E-12  | 0.2973 | 0.2973 | 20.1176  | ITPR1  | Inositol 1,4 ITPR1 |
| beta-Nicotinamide mononucleotide | BIP_HUMAN   | 2.62E-07 | 0.2838 | 0.2838 | 11.3671  | HSPA5  | Endoplasm BIP      |
| beta-Nicotinamide mononucleotide | RAC1_HUMAN  | 7.54E-10 | 0.2857 | 0.2857 | 15.9278  | RAC1   | Ras-related RAC1   |
| Crotonoside                      | ASNS_HUMAN  | 9.47E-70 | 0.3919 | 1.1451 | 123.4694 | ASNS   | Asparagine ASNS    |
| Crotonoside                      | BIP_HUMAN   | 9.75E-86 | 0.4667 | 3.6826 | 152.1721 | HSPA5  | Endoplasm BIP      |
| Crotonoside                      | DNMT1_HUMAN | 2.26E-35 | 0.58   | 8.4349 | 61.7511  | DNMT1  | DNA (cyto DNMT1    |
| Crotonoside                      | EZH2_HUMAN  | 9.26E-08 | 0.4462 | 2.8689 | 12.1773  | EZH2   | Histone-lys EZH2   |
| Crotonoside                      | HS71A_HUMAN | 5.5E-08  | 0.403  | 0.403  | 12.5833  | HSPA1A | Heat shock HS71A   |
| Crotonoside                      | HSP7C_HUMAN | 2.7E-64  | 0.4561 | 4.4437 | 113.6746 | HSPA8  | Heat shock HSP7C   |
| Crotonoside                      | KAPCA_HUMAN | 5.68E-12 | 0.3714 | 5.1573 | 19.7395  | PRKACA | cAMP-dep KAPCA     |
| Crotonoside                      | RAC1_HUMAN  | 2.22E-16 | 0.4923 | 0.4923 | 27.683   | RAC1   | Ras-related RAC1   |
| Cyanidin 3-rutinoside            | IL2_HUMAN   | 1.92E-24 | 0.375  | 1.4064 | 42.1283  | IL2    | Interleukin IL2    |
| Cynaroside                       | ABCG2_HUMAN | 4.83E-08 | 0.5556 | 3.8238 | 12.6846  | ABCG2  | Broad subs ABCG2   |
| Cynaroside                       | CP1A1_HUMAN | 7.69E-11 | 0.371  | 0.9949 | 17.708   | CYP1A1 | Cytochrom CP1A1    |
| Cynaroside                       | CP1B1_HUMAN | 3.09E-25 | 0.5556 | 5.6301 | 43.5526  | CYP1B1 | Cytochrom CP1B1    |
| Cynaroside                       | CP2C8_HUMAN | 1.52E-08 | 0.371  | 0.371  | 13.5869  | CYP2C8 | Cytochrom CP2C8    |
| Cynaroside                       | CREB1_HUMAN | 5.27E-69 | 0.3529 | 1.3674 | 122.1316 | CREB1  | Cyclic AM CREB1    |
| Cynaroside                       | FGF2_HUMAN  | 3.8E-14  | 0.3143 | 0.6092 | 23.6434  | FGF2   | Fibroblast FGF2    |
| Cynaroside                       | IL2_HUMAN   | 7.8E-42  | 1      | 2.4376 | 73.3518  | IL2    | Interleukin IL2    |
| Cynaroside                       | IL6_HUMAN   | 1.72E-07 | 0.2917 | 0.2917 | 11.6937  | IL6    | Interleukin IL6    |
| Cynaroside                       | MDR1_HUMAN  | 1.06E-09 | 0.4386 | 7.6954 | 15.6613  | ABCB1  | ATP-depen MDR1     |
| Cynaroside                       | MRP1_HUMAN  | 5.64E-11 | 0.4516 | 2.9469 | 17.9497  | ABCC1  | Multidrug MRP1     |
| Cynaroside                       | RASH_HUMAN  | 1.2E-14  | 0.3896 | 1.1128 | 24.5402  | HRAS   | GTPase HFRASH      |



|                       |             |          |        |         |         |        |              |
|-----------------------|-------------|----------|--------|---------|---------|--------|--------------|
| Cynaroside            | TNFA_HUMAN  | 7.79E-05 | 1      | 2.3248  | 6.9264  | TNF    | Tumor necr   |
| Cynaroside            | TTHY_HUMAN  | 3.12E-07 | 0.5556 | 0.9942  | 11.2298 | TTR    | Transthyret  |
| Cynaroside            | VEGFA_HUMAN | 1.11E-16 | 0.3913 | 1.0005  | 28.0713 | VEGFA  | Vascular et  |
| Cynaroside            | XDH_HUMAN   | 8.28E-33 | 0.5821 | 7.1121  | 57.147  | XDH    | Xanthine d   |
| CYS-GLY               | ARG1_HUMAN  | 3.52E-24 | 0.2973 | 0.2973  | 41.6573 | ARG1   | Arginase-1   |
| CYS-GLY               | GSTM1_HUMAN | 1.62E-20 | 0.3269 | 0.3269  | 35.0815 | GSTM1  | Glutathione  |
| CYS-GLY               | GSTP1_HUMAN | 8.17E-14 | 0.3269 | 1.9133  | 23.0468 | GSTP1  | Glutathione  |
| D-Maltose             | FGF2_HUMAN  | 4.1E-33  | 0.5349 | 1.4719  | 57.6962 | FGF2   | Fibroblast   |
| D-Maltose             | IL2_HUMAN   | 5.55E-16 | 0.3051 | 0.9051  | 26.9467 | IL2    | Interleukin  |
| D-Maltose             | RASH_HUMAN  | 4.35E-06 | 0.431  | 0.431   | 9.1757  | HRAS   | GTPase H     |
| D-Maltose             | VEGFA_HUMAN | 4.18E-24 | 0.5349 | 1.4719  | 41.5233 | VEGFA  | Vascular et  |
| DG(16:0/16:0/0:0)     | CP2E1_HUMAN | 5.59E-31 | 0.3023 | 0.6047  | 53.8625 | CYP2E1 | Cytochrom    |
| DG(16:0/16:0/0:0)     | EST2_HUMAN  | 1.11E-16 | 0.3939 | 3.1976  | 28.2502 | CES2   | Cocaine est  |
| DG(16:0/16:0/0:0)     | HYEP_HUMAN  | 1.22E-07 | 0.325  | 2.0851  | 11.9629 | EPHX1  | Epoxide hy   |
| DG(16:0/16:0/0:0)     | KPCA_HUMAN  | 2.53E-37 | 1      | 24.9742 | 65.2532 | PRKCA  | Protein kin  |
| DG(16:0/16:0/0:0)     | KPCE_HUMAN  | 1.67E-13 | 1      | 4.6947  | 22.4883 | PRKCE  | Protein kin  |
| DG(16:0/16:0/0:0)     | TLR4_HUMAN  | 2.02E-09 | 0.2821 | 1.1282  | 15.159  | TLR4   | Toll-like re |
| DG(16:0/16:0/0:0)     | VEGFA_HUMAN | 5.55E-16 | 0.4815 | 0.963   | 27.0013 | VEGFA  | Vascular et  |
| Erucic acid           | CNR1_HUMAN  | 1.12E-14 | 0.5714 | 28.7126 | 24.5926 | CNR1   | Cannabinoid  |
| Erucic acid           | EST2_HUMAN  | 4.13E-36 | 0.5    | 7.0218  | 63.0756 | CES2   | Cocaine est  |
| Erucic acid           | GSTM1_HUMAN | 5.19E-19 | 0.3019 | 0.3019  | 32.377  | GSTM1  | Glutathione  |
| Erucic acid           | HMDH_HUMAN  | 1.07E-17 | 0.6471 | 4.7619  | 30.0178 | HMGCR  | 3-hydroxy-   |
| Erucic acid           | HYEP_HUMAN  | 8.88E-16 | 0.3548 | 4.4244  | 26.5754 | EPHX1  | Epoxide hy   |
| Erucic acid           | KPCA_HUMAN  | 7.84E-23 | 0.475  | 15.2644 | 39.2366 | PRKCA  | Protein kin  |
| Erucic acid           | KPCE_HUMAN  | 1.33E-06 | 0.339  | 2.2383  | 10.0996 | PRKCE  | Protein kin  |
| Erucic acid           | MGLL_HUMAN  | 1.19E-06 | 0.4571 | 2.1877  | 10.1833 | MGLL   | Monoglyce    |
| Erucic acid           | MPIP2_HUMAN | 4.73E-12 | 0.5676 | 3.7079  | 19.8816 | CDC25B | M-phase in   |
| Erucic acid           | PPARA_HUMAN | 2.3E-09  | 1      | 11.3778 | 15.0575 | PPARA  | Peroxisom    |
| Erucic acid           | PPARG_HUMAN | 5.19E-10 | 1      | 16.6614 | 16.2199 | PPARG  | Peroxisom    |
| Galactose 1-phosphate | FGF2_HUMAN  | 1.26E-24 | 0.375  | 1.0859  | 42.4593 | FGF2   | Fibroblast   |
| Galactose 1-phosphate | IL2_HUMAN   | 5.78E-22 | 0.3276 | 1.2595  | 37.6797 | IL2    | Interleukin  |
| Galactose 1-phosphate | ITPR1_HUMAN | 1.28E-26 | 0.3636 | 0.6747  | 46.0373 | ITPR1  | Inositol 1,4 |
| Galactose 1-phosphate | TLR4_HUMAN  | 5.62E-09 | 0.3571 | 1.0714  | 14.3613 | TLR4   | Toll-like re |
| Galactose 1-phosphate | VEGFA_HUMAN | 5.7E-18  | 0.375  | 1.0859  | 30.5084 | VEGFA  | Vascular et  |
| Glucose 1-phosphate   | FGF2_HUMAN  | 1.26E-24 | 0.375  | 1.0859  | 42.4593 | FGF2   | Fibroblast   |
| Glucose 1-phosphate   | IL2_HUMAN   | 5.78E-22 | 0.3276 | 1.2595  | 37.6797 | IL2    | Interleukin  |
| Glucose 1-phosphate   | ITPR1_HUMAN | 1.28E-26 | 0.3636 | 0.6747  | 46.0373 | ITPR1  | Inositol 1,4 |

|                           |             |          |        |        |          |        |                   |
|---------------------------|-------------|----------|--------|--------|----------|--------|-------------------|
| Glucose 1-phosphate       | TLR4_HUMAN  | 5.62E-09 | 0.3571 | 1.0714 | 14.3613  | TLR4   | Toll-like re TLR4 |
| Glucose 1-phosphate       | VEGFA_HUMAN | 5.7E-18  | 0.375  | 1.0859 | 30.5084  | VEGFA  | Vascular er VEGFA |
| Kaempferol-3-O-rutinoside | ABCG2_HUMAN | 1.4E-10  | 0.3939 | 5.0606 | 17.2417  | ABCG2  | Broad subs ABCG2  |
| Kaempferol-3-O-rutinoside | CP1B1_HUMAN | 9.42E-21 | 0.4328 | 4.6114 | 35.5029  | CYP1B1 | Cytochrom CP1B1   |
| Kaempferol-3-O-rutinoside | CP2C8_HUMAN | 5E-09    | 0.3939 | 0.3939 | 14.4536  | CYP2C8 | Cytochrom CP2C8   |
| Kaempferol-3-O-rutinoside | IL2_HUMAN   | 1.26E-31 | 0.4156 | 1.8323 | 55.0231  | IL2    | Interleukin· IL2  |
| Kaempferol-3-O-rutinoside | MDR1_HUMAN  | 9.54E-07 | 0.4545 | 5.3603 | 10.3583  | ABCB1  | ATP-depen MDR1    |
| Kaempferol-3-O-rutinoside | MRP1_HUMAN  | 1.15E-07 | 0.3939 | 2.0247 | 12.0057  | ABCC1  | Multidrug 1 MRP1  |
| Kaempferol-3-O-rutinoside | XDH_HUMAN   | 1.16E-25 | 0.6522 | 5.541  | 44.3194  | XDH    | Xanthine d XDH    |
| Kojibiose                 | FGF2_HUMAN  | 1.12E-14 | 0.3333 | 0.6333 | 24.5976  | FGF2   | Fibroblast { FGF2 |
| Kojibiose                 | VEGFA_HUMAN | 8.88E-11 | 0.3333 | 0.6333 | 17.5961  | VEGFA  | Vascular er VEGFA |
| L-Arginine                | ARG1_HUMAN  | 3.39E-57 | 0.3611 | 0.7183 | 100.9302 | ARG1   | Arginase-1 ARG1   |
| L-Arginine                | GSH1_HUMAN  | 5.16E-60 | 0.3333 | 0.9833 | 105.9904 | GCLC   | Glutamate- GSH1   |
| L-Arginine                | NOS2_HUMAN  | 1.11E-16 | 0.7241 | 8.8604 | 28.4904  | NOS2   | Nitric oxid NOS2  |
| L-Arginine                | NOS3_HUMAN  | 7.41E-13 | 0.7241 | 3.9631 | 21.3271  | NOS3   | Nitric oxid NOS3  |
| Lactulose                 | FGF2_HUMAN  | 2.23E-29 | 0.4706 | 1.302  | 50.9879  | FGF2   | Fibroblast { FGF2 |
| Lactulose                 | IL2_HUMAN   | 1.24E-20 | 0.3125 | 1.1806 | 35.2885  | IL2    | Interleukin· IL2  |
| Lactulose                 | VEGFA_HUMAN | 2.1E-21  | 0.4706 | 1.302  | 36.6739  | VEGFA  | Vascular er VEGFA |
| Liriodendrin              | FGF2_HUMAN  | 3.96E-22 | 0.3492 | 0.9722 | 37.9734  | FGF2   | Fibroblast { FGF2 |
| Liriodendrin              | IL2_HUMAN   | 3.24E-30 | 0.3973 | 1.7488 | 52.4937  | IL2    | Interleukin· IL2  |
| Liriodendrin              | IL6_HUMAN   | 3.48E-09 | 0.3651 | 0.3651 | 14.735   | IL6    | Interleukin· IL6  |
| Liriodendrin              | VEGFA_HUMAN | 3.33E-16 | 0.3492 | 0.9722 | 27.2655  | VEGFA  | Vascular er VEGFA |
| Narcissoside              | ABCG2_HUMAN | 1.44E-15 | 0.4521 | 7.4834 | 26.1687  | ABCG2  | Broad subs ABCG2  |
| Narcissoside              | CP1A1_HUMAN | 1.18E-07 | 0.4    | 0.684  | 11.9861  | CYP1A1 | Cytochrom CP1A1   |
| Narcissoside              | CP1B1_HUMAN | 8.38E-26 | 0.5522 | 5.759  | 44.571   | CYP1B1 | Cytochrom CP1B1   |
| Narcissoside              | CP2C8_HUMAN | 3.73E-09 | 0.4    | 0.4    | 14.6823  | CYP2C8 | Cytochrom CP2C8   |
| Narcissoside              | IL2_HUMAN   | 1.34E-30 | 0.4024 | 1.7714 | 53.1789  | IL2    | Interleukin· IL2  |
| Narcissoside              | MDR1_HUMAN  | 3.51E-06 | 0.4507 | 4.9135 | 9.3436   | ABCB1  | ATP-depen MDR1    |
| Narcissoside              | MRP1_HUMAN  | 2.56E-07 | 0.4588 | 1.9284 | 11.385   | ABCC1  | Multidrug 1 MRP1  |
| Narcissoside              | XDH_HUMAN   | 1.14E-18 | 0.6    | 4.0033 | 31.7644  | XDH    | Xanthine d XDH    |
| Peonidin-3-glucoside      | FGF2_HUMAN  | 1.8E-07  | 0.3056 | 0.3056 | 11.6604  | FGF2   | Fibroblast { FGF2 |
| Peonidin-3-glucoside      | IL2_HUMAN   | 2.06E-30 | 0.48   | 1.7604 | 52.8465  | IL2    | Interleukin· IL2  |
| Peonidin-3-glucoside      | IL6_HUMAN   | 1.87E-09 | 0.3768 | 0.3768 | 15.2211  | IL6    | Interleukin· IL6  |
| Peonidin-3-glucoside      | NFKB1_HUMAN | 3.12E-07 | 0.2923 | 0.574  | 11.2311  | NFKB1  | Nuclear fac NFKB1 |
| Peonidin-3-glucoside      | RASH_HUMAN  | 3.82E-12 | 0.3133 | 0.9135 | 20.0484  | HRAS   | GTPase H RASH     |
| Procyanidin B1            | CP1B1_HUMAN | 3.55E-06 | 0.35   | 1.2999 | 9.335    | CYP1B1 | Cytochrom CP1B1   |
| Procyanidin B1            | VEGFA_HUMAN | 1.99E-29 | 0.6333 | 1.8068 | 51.0795  | VEGFA  | Vascular er VEGFA |

|                                |             |          |        |        |          |        |                   |
|--------------------------------|-------------|----------|--------|--------|----------|--------|-------------------|
| Procyanidin B2                 | CP1B1_HUMAN | 3.55E-06 | 0.35   | 1.2999 | 9.335    | CYP1B1 | Cytochrom CP1B1   |
| Procyanidin B2                 | VEGFA_HUMAN | 1.99E-29 | 0.6333 | 1.8068 | 51.0795  | VEGFA  | Vascular ei VEGFA |
| Rutin                          | ABCG2_HUMAN | 7.52E-10 | 0.4921 | 4.7047 | 15.9303  | ABCG2  | Broad subs ABCG2  |
| Rutin                          | CP1B1_HUMAN | 3.03E-21 | 0.4921 | 4.7234 | 36.3876  | CYP1B1 | Cytochrom CP1B1   |
| Rutin                          | CP2C8_HUMAN | 4.33E-11 | 0.4921 | 0.4921 | 18.1558  | CYP2C8 | Cytochrom CP2C8   |
| Rutin                          | IL2_HUMAN   | 2.13E-31 | 0.48   | 1.8188 | 54.6155  | IL2    | Interleukin· IL2  |
| Rutin                          | MRP1_HUMAN  | 5.84E-08 | 0.4921 | 2.1071 | 12.537   | ABCC1  | Multidrug 1 MRP1  |
| Rutin                          | XDH_HUMAN   | 3.38E-26 | 0.6571 | 5.6584 | 45.2777  | XDH    | Xanthine d XDH    |
| Sucrose                        | BIP_HUMAN   | 2.36E-07 | 0.2857 | 0.2857 | 11.4471  | HSPA5  | Endoplasm BIP     |
| Sucrose                        | FGF2_HUMAN  | 1.31E-23 | 0.3774 | 1.0396 | 40.6312  | FGF2   | Fibroblast { FGF2 |
| Sucrose                        | IL2_HUMAN   | 1.11E-16 | 0.3387 | 0.9372 | 27.9183  | IL2    | Interleukin· IL2  |
| Sucrose                        | RASH_HUMAN  | 2.23E-08 | 0.3134 | 0.6134 | 13.2861  | HRAS   | GTPase HFRASH     |
| Sucrose                        | VEGFA_HUMAN | 3.11E-17 | 0.3774 | 1.0396 | 29.1869  | VEGFA  | Vascular ei VEGFA |
| Turanose                       | FGF2_HUMAN  | 9.8E-21  | 0.3103 | 0.9089 | 35.4722  | FGF2   | Fibroblast { FGF2 |
| Turanose                       | VEGFA_HUMAN | 3.66E-15 | 0.3103 | 0.9089 | 25.4574  | VEGFA  | Vascular ei VEGFA |
| Uridine 5'-diphospho-D-glucose | ASNS_HUMAN  | 1.96E-52 | 0.2921 | 0.8574 | 92.3812  | ASNS   | Asparagine ASNS   |
| Uridine 5'-diphospho-D-glucose | BIP_HUMAN   | 5.45E-10 | 0.4    | 0.4    | 16.1817  | HSPA5  | Endoplasm BIP     |
| Uridine 5'-diphospho-D-glucose | FGF2_HUMAN  | 1.26E-07 | 0.3125 | 0.3125 | 11.9345  | FGF2   | Fibroblast { FGF2 |
| Uridine 5'-diphospho-D-glucose | HS71A_HUMAN | 3.58E-08 | 0.4133 | 0.4133 | 12.9179  | HSPA1A | Heat shock HS71A  |
| Uridine 5'-diphospho-D-glucose | HSP7C_HUMAN | 8.23E-11 | 0.4    | 0.7067 | 17.6552  | HSPA8  | Heat shock HSP7C  |
| Uridine 5'-diphospho-D-glucose | RAC1_HUMAN  | 5.77E-14 | 0.4156 | 0.4156 | 23.3174  | RAC1   | Ras-related RAC1  |
| Vidarabine                     | ASNS_HUMAN  | 7.01E-94 | 0.5312 | 1.5462 | 166.7915 | ASNS   | Asparagine ASNS   |
| Vidarabine                     | BIP_HUMAN   | 3.3E-137 | 0.6596 | 5.9129 | 244.5703 | HSPA5  | Endoplasm BIP     |
| Vidarabine                     | DNMT1_HUMAN | 8.55E-38 | 0.6182 | 9.0197 | 66.0993  | DNMT1  | DNA (cyto DNMT1   |
| Vidarabine                     | EZH2_HUMAN  | 4.66E-10 | 0.6182 | 3.7514 | 16.3037  | EZH2   | Histone-lys EZH2  |
| Vidarabine                     | HS71A_HUMAN | 7.33E-12 | 0.6182 | 0.6182 | 19.5402  | HSPA1A | Heat shock HS71A  |
| Vidarabine                     | HSP7C_HUMAN | 2.68E-85 | 0.6596 | 5.9113 | 151.3831 | HSPA8  | Heat shock HSP7C  |
| Vidarabine                     | KAPCA_HUMAN | 7.32E-18 | 0.5424 | 7.7457 | 30.3139  | PRKACA | cAMP-dep KAPCA    |
| Vidarabine                     | RAC1_HUMAN  | 2.8E-13  | 0.3939 | 0.3939 | 22.0858  | RAC1   | Ras-related RAC1  |
