# Supplementary material
Source: publisher site journal article supplement (https://www.dovepress.com/article/335312)
Supplement: Supplementary file 3 [file 335312 Revised Table S3.pdf › 335312 Revised Table S3.pdf]

Table S3. KEGG function enrichment suggested that target genes are related to various inflammation response pathways

| Biological pathway                | No. of genes in the dataset | No. of genes in the background dataset | Percentage of genes | Fold enrichment | P-value (Hypergeometric test) | Bonferroni method | BH method | Q-value (Storey-Tibshirani method) | Mapped gene names                                                                                                                                                                                                                                                                                                                                                                                                                                                                                                                                                                                                                                                                                                                                                                                                                                                                                                                                                                                                                                                                                                              |
|-----------------------------------|-----------------------------|----------------------------------------|---------------------|-----------------|-------------------------------|-------------------|-----------|------------------------------------|--------------------------------------------------------------------------------------------------------------------------------------------------------------------------------------------------------------------------------------------------------------------------------------------------------------------------------------------------------------------------------------------------------------------------------------------------------------------------------------------------------------------------------------------------------------------------------------------------------------------------------------------------------------------------------------------------------------------------------------------------------------------------------------------------------------------------------------------------------------------------------------------------------------------------------------------------------------------------------------------------------------------------------------------------------------------------------------------------------------------------------|
| LPA receptor mediated events      | 20                          | 100                                    | 15.504              | 9.7551          | 5E-15                         | 9E-12             | 4E-12     | 2E-11                              | EGFR; FOS; MMP9; NFKB1; CREB1; MMP2; SRC; RELA; PRKCA; CXCL8; PRKCE; TNF; AKT1; RHOA; JUN; ESR1; ACHE; HSP90AA1; NR4A1; SMAD3; STAT1; FOS; MMP9; NFKB1; SERPINE1; CXCL12; CREB1; NPPA; HDAC1; MMP2; CDC25B; SRC; TH; FABP4; PPARG; ARG1; NOS2; NOS3; RELA; VEGFA; PRKCA; CXCL8; ESR1; ACHE; DNMT3A; HSPA1A; HSP90AA1; NR4A1; SMAD3; STAT1; APP; HSPD1; EGFR; FOS; MMP9; NFKB1; SERPINE1; CXCL12; CREB1; NPPA; CASP1; CASP9; SLC2A4; HDAC1; ITGB1; MMP13; MMP2; MMP3; CDC25B; PCNA; SRC; TH; ODC1; FABP4; PPARG; ARG1; NOS2; NOS3; RELA; VEGFA; PRKCA; CXCL8; ESR1; ACHE; DNMT3A; HSPA1A; HSP90AA1; NR4A1; SMAD3; STAT1; HSPD1; EGFR; FOS; MMP9; NFKB1; SERPINE1; CXCL12; CREB1; NPPA; CASP1; CASP9; SLC2A4; HDAC1; IL1B; ITGB1; MMP13; MMP2; MMP3; CDC25B; PCNA; SRC; TH; ODC1; FABP4; PPARG; ARG1; NOS2; NOS3; RELA; VEGFA; PRKCA; CXCL8; PRKCE; ESR1; ACHE; DNMT3A; HSPA1A; HSP90AA1; NR4A1; SMAD3; STAT1; APP; HSPD1; EGFR; FOS; MMP9; NFKB1; SERPINE1; CXCL12; CREB1; NPPA; CASP1; CASP9; SLC2A4; HDAC1; ITGB1; MMP13; MMP2; MMP3; CDC25B; PCNA; SRC; TH; ODC1; FABP4; PPARG; ARG1; NOS2; NOS3; RELA; VEGFA; PRKCA; CXCL8; |
| AP-1 transcription factor network | 45                          | 621                                    | 34.884              | 3.5338          | 6E-15                         | 9E-12             | 4E-12     | 2E-11                              | MMP9; NFKB1; SERPINE1; CXCL12; CREB1; NPPA; HDAC1; MMP2; CDC25B; SRC; TH; FABP4; PPARG; ARG1; NOS2; NOS3; RELA; VEGFA; PRKCA; CXCL8; ESR1; ACHE; DNMT3A; HSPA1A; HSP90AA1; NR4A1; SMAD3; STAT1; APP; HSPD1; EGFR; FOS; MMP9; NFKB1; SERPINE1; CXCL12; CREB1; NPPA; CASP1; CASP9; SLC2A4; HDAC1; ITGB1; MMP13; MMP2; MMP3; CDC25B; PCNA; SRC; TH; ODC1; FABP4; PPARG; ARG1; NOS2; NOS3; RELA; VEGFA; PRKCA; CXCL8; ESR1; ACHE; DNMT3A; HSPA1A; HSP90AA1; NR4A1; SMAD3; STAT1; HSPD1; EGFR; FOS; MMP9; NFKB1; SERPINE1; CXCL12; CREB1; NPPA; CASP1; CASP9; SLC2A4; HDAC1; IL1B; ITGB1; MMP13; MMP2; MMP3; CDC25B; PCNA; SRC; TH; ODC1; FABP4; PPARG; ARG1; NOS2; NOS3; RELA; VEGFA; PRKCA; CXCL8; PRKCE; ESR1; ACHE; DNMT3A; HSPA1A; HSP90AA1; NR4A1; SMAD3; STAT1; APP; HSPD1; EGFR; FOS; MMP9; NFKB1; SERPINE1; CXCL12; CREB1; NPPA; CASP1; CASP9; SLC2A4; HDAC1; ITGB1; MMP13; MMP2; MMP3; CDC25B; PCNA; SRC; TH; ODC1; FABP4; PPARG; ARG1; NOS2; NOS3; RELA; VEGFA; PRKCA; CXCL8;                                                                                                                                            |
| Glypican 1 network                | 66                          | 1296                                   | 51.163              | 2.4833          | 7E-15                         | 1E-11             | 4E-12     | 2E-11                              | EGFR; FOS; MMP9; NFKB1; CREB1; MMP2; SRC; RELA; PRKCA; CXCL8; PRKCE; TNF; AKT1; RHOA; JUN; ESR1; ACHE; HSP90AA1; NR4A1; SMAD3; STAT1; FOS; MMP9; NFKB1; SERPINE1; CXCL12; CREB1; NPPA; HDAC1; MMP2; CDC25B; SRC; TH; FABP4; PPARG; ARG1; NOS2; NOS3; RELA; VEGFA; PRKCA; CXCL8; ESR1; ACHE; DNMT3A; HSPA1A; HSP90AA1; NR4A1; SMAD3; STAT1; APP; HSPD1; EGFR; FOS; MMP9; NFKB1; SERPINE1; CXCL12; CREB1; NPPA; CASP1; CASP9; SLC2A4; HDAC1; ITGB1; MMP13; MMP2; MMP3; CDC25B; PCNA; SRC; TH; ODC1; FABP4; PPARG; ARG1; NOS2; NOS3; RELA; VEGFA; PRKCA; CXCL8; ESR1; ACHE; DNMT3A; HSPA1A; HSP90AA1; NR4A1; SMAD3; STAT1; HSPD1; EGFR; FOS; MMP9; NFKB1; SERPINE1; CXCL12; CREB1; NPPA; CASP1; CASP9; SLC2A4; HDAC1; IL1B; ITGB1; MMP13; MMP2; MMP3; CDC25B; PCNA; SRC; TH; ODC1; FABP4; PPARG; ARG1; NOS2; NOS3; RELA; VEGFA; PRKCA; CXCL8; PRKCE; ESR1; ACHE; DNMT3A; HSPA1A; HSP90AA1; NR4A1; SMAD3; STAT1; APP; HSPD1; EGFR; FOS; MMP9; NFKB1; SERPINE1; CXCL12; CREB1; NPPA; CASP1; CASP9; SLC2A4; HDAC1; ITGB1; MMP13; MMP2; MMP3; CDC25B; PCNA; SRC; TH; ODC1; FABP4; PPARG; ARG1; NOS2; NOS3; RELA; VEGFA; PRKCA; CXCL8; |
| IFN-gamma pathway                 | 65                          | 1293                                   | 50.388              | 2.4514          | 3E-14                         | 4E-11             | 6E-12     | 3E-11                              | EGFR; FOS; MMP9; NFKB1; CREB1; MMP2; SRC; RELA; PRKCA; CXCL8; PRKCE; TNF; AKT1; RHOA; JUN; ESR1; ACHE; HSP90AA1; NR4A1; SMAD3; STAT1; FOS; MMP9; NFKB1; SERPINE1; CXCL12; CREB1; NPPA; HDAC1; MMP2; CDC25B; SRC; TH; FABP4; PPARG; ARG1; NOS2; NOS3; RELA; VEGFA; PRKCA; CXCL8; ESR1; ACHE; DNMT3A; HSPA1A; HSP90AA1; NR4A1; SMAD3; STAT1; APP; HSPD1; EGFR; FOS; MMP9; NFKB1; SERPINE1; CXCL12; CREB1; NPPA; CASP1; CASP9; SLC2A4; HDAC1; ITGB1; MMP13; MMP2; MMP3; CDC25B; PCNA; SRC; TH; ODC1; FABP4; PPARG; ARG1; NOS2; NOS3; RELA; VEGFA; PRKCA; CXCL8; PRKCE; ESR1; ACHE; DNMT3A; HSPA1A; HSP90AA1; NR4A1; SMAD3; STAT1; APP; HSPD1; EGFR; FOS; MMP9; NFKB1; SERPINE1; CXCL12; CREB1; NPPA; CASP1; CASP9; SLC2A4; HDAC1; IL1B; ITGB1; MMP13; MMP2; MMP3; CDC25B; PCNA; SRC; TH; ODC1; FABP4; PPARG; ARG1; NOS2; NOS3; RELA; VEGFA; PRKCA; CXCL8;                                                                                                                                                                                                                                                                         |
| Glypican pathway                  | 66                          | 1335                                   | 51.163              | 2.4108          | 3E-14                         | 6E-11             | 6E-12     | 3E-11                              | EGFR; FOS; MMP9; NFKB1; CREB1; MMP2; SRC; RELA; PRKCA; CXCL8; PRKCE; TNF; AKT1; RHOA; JUN; ESR1; ACHE; HSP90AA1; NR4A1; SMAD3; STAT1; FOS; MMP9; NFKB1; SERPINE1; CXCL12; CREB1; NPPA; HDAC1; MMP2; CDC25B; SRC; TH; FABP4; PPARG; ARG1; NOS2; NOS3; RELA; VEGFA; PRKCA; CXCL8; ESR1; ACHE; DNMT3A; HSPA1A; HSP90AA1; NR4A1; SMAD3; STAT1; APP; HSPD1; EGFR; FOS; MMP9; NFKB1; SERPINE1; CXCL12; CREB1; NPPA; CASP1; CASP9; SLC2A4; HDAC1; ITGB1; MMP13; MMP2; MMP3; CDC25B; PCNA; SRC; TH; ODC1; FABP4; PPARG; ARG1; NOS2; NOS3; RELA; VEGFA; PRKCA; CXCL8;                                                                                                                                                                                                                                                                                                                                                                                                                                                                                                                                                                   |

|                                               |    |      |        |        |       |       |       |       |                                                                                                                                                                                                                                                                                                                                                                                                                                   |
|-----------------------------------------------|----|------|--------|--------|-------|-------|-------|-------|-----------------------------------------------------------------------------------------------------------------------------------------------------------------------------------------------------------------------------------------------------------------------------------------------------------------------------------------------------------------------------------------------------------------------------------|
| Integrin-linked kinase signaling              | 45 | 654  | 34.884 | 3.3555 | 4E-14 | 6E-11 | 6E-12 | 3E-11 | ESR1; ACHE; HSP90AA1; NR4A1; SMAD3; STAT1; FOS; MMP9; NFKB1; SERPINE1; CXCL12; CREB1; NPPA; HDAC1; MMP2; CDC25B; SRC; TH; FABP4; PPARG; ARG1; NOS2; NOS3; RELA; VEGFA; PRKCA; CXCL8; ESR1; ACHE; DNMT3A; HSPA1A; HSP90AA1; NR4A1; SMAD3; STAT1; HSPD1; EGFR; FOS; MMP9; NFKB1; SERPINE1; CXCL12; CREB1; NPPA; CASP1; CASP9; SLC2A4; HDAC1; ITGB1; MMP13; MMP2; MMP3;                                                              |
| Insulin Pathway                               | 64 | 1285 | 49.612 | 2.4287 | 8E-14 | 1E-10 | 6E-12 | 3E-11 | CDC25B; PCNA; SRC; TH; ODC1; FABP4; PPARG; ARG1; NOS2; NOS3; RELA; VEGFA; PRKCA; CXCL8; PRKCE; TNF; ABCG2; ABCB1; AKT2; AKT1; BAD; SIRT1; CCNA2; CYCS; RHOA; JUN; TNFRSF1A; ADRB2; HMOX1; ABCC1; IGFBP3; CDKN1A; HIF1A; IL2; HSPA8; PRKACA; RAC1; ESR1; ACHE; DNMT3A; HSPA1A; HSP90AA1; NR4A1; SMAD3; STAT1; HSPD1; EGFR; FOS; MMP9; NFKB1; SERPINE1; CXCL12; CREB1; NPPA; CASP1; CASP9; SLC2A4; HDAC1; ITGB1; MMP13; MMP2; MMP3; |
| Class I PI3K signaling events mediated by Akt | 64 | 1285 | 49.612 | 2.4287 | 8E-14 | 1E-10 | 6E-12 | 3E-11 | CDC25B; PCNA; SRC; TH; ODC1; FABP4; PPARG; ARG1; NOS2; NOS3; RELA; VEGFA; PRKCA; CXCL8; PRKCE; TNF; ABCG2; ABCB1; AKT2; AKT1; BAD; SIRT1; CCNA2; CYCS; RHOA; JUN; TNFRSF1A; ADRB2; HMOX1; ABCC1; IGFBP3; CDKN1A; HIF1A; IL2; HSPA8; PRKACA; RAC1; ESR1; ACHE; DNMT3A; HSPA1A; HSP90AA1; NR4A1; SMAD3; STAT1; HSPD1; EGFR; FOS; MMP9; NFKB1; SERPINE1; CXCL12; CREB1; NPPA; CASP1; CASP9; SLC2A4; HDAC1; ITGB1; MMP13; MMP2; MMP3; |
| EGF receptor (ErbB1) signaling pathway        | 64 | 1285 | 49.612 | 2.4287 | 8E-14 | 1E-10 | 6E-12 | 3E-11 | CDC25B; PCNA; SRC; TH; ODC1; FABP4; PPARG; ARG1; NOS2; NOS3; RELA; VEGFA; PRKCA; CXCL8; PRKCE; TNF; ABCG2; ABCB1; AKT2; AKT1; BAD; SIRT1; CCNA2; CYCS; RHOA; JUN; TNFRSF1A; ADRB2; HMOX1; ABCC1; IGFBP3; CDKN1A; HIF1A; IL2; HSPA8; PRKACA; RAC1;                                                                                                                                                                                 |

|                                  |    |      |        |        |       |       |       |       |                                                                                                                                                                                                                                                                                                                                                                                                                                                                                                                                                                                                                                                       |
|----------------------------------|----|------|--------|--------|-------|-------|-------|-------|-------------------------------------------------------------------------------------------------------------------------------------------------------------------------------------------------------------------------------------------------------------------------------------------------------------------------------------------------------------------------------------------------------------------------------------------------------------------------------------------------------------------------------------------------------------------------------------------------------------------------------------------------------|
| Class I PI3K<br>signaling events | 64 | 1285 | 49.612 | 2.4287 | 8E-14 | 1E-10 | 6E-12 | 3E-11 | ESR1; ACHE; DNMT3A; HSPA1A; HSP90AA1; NR4A1;<br>SMAD3; STAT1; HSPD1; EGFR; FOS; MMP9; NFKB1;<br>SERPINE1; CXCL12; CREB1; NPPA; CASP1; CASP9;<br>SLC2A4; HDAC1; ITGB1; MMP13; MMP2; MMP3;<br>CDC25B; PCNA; SRC; TH; ODC1; FABP4; PPARG; ARG1;<br>NOS2; NOS3; RELA; VEGFA; PRKCA; CXCL8; PRKCE;<br>TNF; ABCG2; ABCB1; AKT2; AKT1; BAD; SIRT1; CCNA2;<br>CYCS; RHOA; JUN; TNFRSF1A; ADRB2; HMOX1; ABCC1;<br>IGFBP3; CDKN1A; HIF1A; IL2; HSPA8; PRKACA; RAC1;<br>ESR1; ACHE; DNMT3A; HSPA1A; HSP90AA1; NR4A1;<br>SMAD3; STAT1; HSPD1; EGFR; FOS; MMP9; NFKB1;<br>SERPINE1; CXCL12; CREB1; NPPA; CASP1; CASP9;<br>SLC2A4; HDAC1; ITGB1; MMP13; MMP2; MMP3; |
| PDGFR-beta<br>signaling pathway  | 64 | 1285 | 49.612 | 2.4287 | 8E-14 | 1E-10 | 6E-12 | 3E-11 | CDC25B; PCNA; SRC; TH; ODC1; FABP4; PPARG; ARG1;<br>NOS2; NOS3; RELA; VEGFA; PRKCA; CXCL8; PRKCE;<br>TNF; ABCG2; ABCB1; AKT2; AKT1; BAD; SIRT1; CCNA2;<br>CYCS; RHOA; JUN; TNFRSF1A; ADRB2; HMOX1; ABCC1;<br>IGFBP3; CDKN1A; HIF1A; IL2; HSPA8; PRKACA; RAC1;<br>ESR1; ACHE; DNMT3A; HSPA1A; HSP90AA1; NR4A1;<br>SMAD3; STAT1; HSPD1; EGFR; FOS; MMP9; NFKB1;<br>SERPINE1; CXCL12; CREB1; NPPA; CASP1; CASP9;<br>SLC2A4; HDAC1; ITGB1; MMP13; MMP2; MMP3;                                                                                                                                                                                             |
| Arf6 signaling<br>events         | 64 | 1285 | 49.612 | 2.4287 | 8E-14 | 1E-10 | 6E-12 | 3E-11 | CDC25B; PCNA; SRC; TH; ODC1; FABP4; PPARG; ARG1;<br>NOS2; NOS3; RELA; VEGFA; PRKCA; CXCL8; PRKCE;<br>TNF; ABCG2; ABCB1; AKT2; AKT1; BAD; SIRT1; CCNA2;<br>CYCS; RHOA; JUN; TNFRSF1A; ADRB2; HMOX1; ABCC1;<br>IGFBP3; CDKN1A; HIF1A; IL2; HSPA8; PRKACA; RAC1;<br>ESR1; ACHE; DNMT3A; HSPA1A; HSP90AA1; NR4A1;<br>SMAD3; STAT1; HSPD1; EGFR; FOS; MMP9; NFKB1;<br>SERPINE1; CXCL12; CREB1; NPPA; CASP1; CASP9;<br>SLC2A4; HDAC1; ITGB1; MMP13; MMP2; MMP3;                                                                                                                                                                                             |
| Internalization of<br>ErbB1      | 64 | 1285 | 49.612 | 2.4287 | 8E-14 | 1E-10 | 6E-12 | 3E-11 | CDC25B; PCNA; SRC; TH; ODC1; FABP4; PPARG; ARG1;<br>NOS2; NOS3; RELA; VEGFA; PRKCA; CXCL8; PRKCE;<br>TNF; ABCG2; ABCB1; AKT2; AKT1; BAD; SIRT1; CCNA2;<br>CYCS; RHOA; JUN; TNFRSF1A; ADRB2; HMOX1; ABCC1;<br>IGFBP3; CDKN1A; HIF1A; IL2; HSPA8; PRKACA; RAC1;                                                                                                                                                                                                                                                                                                                                                                                         |

|                                                                        |    |      |        |        |       |       |       |       |                                                                                                                                                                                                                                                                                                                                                                                                                                                                                                                                                                                                                   |
|------------------------------------------------------------------------|----|------|--------|--------|-------|-------|-------|-------|-------------------------------------------------------------------------------------------------------------------------------------------------------------------------------------------------------------------------------------------------------------------------------------------------------------------------------------------------------------------------------------------------------------------------------------------------------------------------------------------------------------------------------------------------------------------------------------------------------------------|
| Urokinase-type plasminogen activator (uPA) and uPAR-mediated signaling | 64 | 1285 | 49.612 | 2.4287 | 8E-14 | 1E-10 | 6E-12 | 3E-11 | ESR1; ACHE; DNMT3A; HSPA1A; HSP90AA1; NR4A1; SMAD3; STAT1; HSPD1; EGFR; FOS; MMP9; NFKB1; SERPINE1; CXCL12; CREB1; NPPA; CASP1; CASP9; SLC2A4; HDAC1; ITGB1; MMP13; MMP2; MMP3; CDC25B; PCNA; SRC; TH; ODC1; FABP4; PPARG; ARG1; NOS2; NOS3; RELA; VEGFA; PRKCA; CXCL8; PRKCE; TNF; ABCG2; ABCB1; AKT2; AKT1; BAD; SIRT1; CCNA2; CYCS; RHOA; JUN; TNFRSF1A; ADRB2; HMOX1; ABCC1; IGFBP3; CDKN1A; HIF1A; IL2; HSPA8; PRKACA; RAC1; ESR1; ACHE; DNMT3A; HSPA1A; HSP90AA1; NR4A1; SMAD3; STAT1; HSPD1; EGFR; FOS; MMP9; NFKB1; SERPINE1; CXCL12; CREB1; NPPA; CASP1; CASP9; SLC2A4; HDAC1; ITGB1; MMP13; MMP2; MMP3; |
| ErbB1 downstream signaling                                             | 64 | 1285 | 49.612 | 2.4287 | 8E-14 | 1E-10 | 6E-12 | 3E-11 | CDC25B; PCNA; SRC; TH; ODC1; FABP4; PPARG; ARG1; NOS2; NOS3; RELA; VEGFA; PRKCA; CXCL8; PRKCE; TNF; ABCG2; ABCB1; AKT2; AKT1; BAD; SIRT1; CCNA2; CYCS; RHOA; JUN; TNFRSF1A; ADRB2; HMOX1; ABCC1; IGFBP3; CDKN1A; HIF1A; IL2; HSPA8; PRKACA; RAC1; ESR1; ACHE; DNMT3A; HSPA1A; HSP90AA1; NR4A1; SMAD3; STAT1; HSPD1; EGFR; FOS; MMP9; NFKB1; SERPINE1; CXCL12; CREB1; NPPA; CASP1; CASP9; SLC2A4; HDAC1; ITGB1; MMP13; MMP2; MMP3;                                                                                                                                                                                 |
| mTOR signaling pathway                                                 | 64 | 1285 | 49.612 | 2.4287 | 8E-14 | 1E-10 | 6E-12 | 3E-11 | CDC25B; PCNA; SRC; TH; ODC1; FABP4; PPARG; ARG1; NOS2; NOS3; RELA; VEGFA; PRKCA; CXCL8; PRKCE; TNF; ABCG2; ABCB1; AKT2; AKT1; BAD; SIRT1; CCNA2; CYCS; RHOA; JUN; TNFRSF1A; ADRB2; HMOX1; ABCC1; IGFBP3; CDKN1A; HIF1A; IL2; HSPA8; PRKACA; RAC1; ESR1; ACHE; DNMT3A; HSPA1A; HSP90AA1; NR4A1; SMAD3; STAT1; HSPD1; EGFR; FOS; MMP9; NFKB1; SERPINE1; CXCL12; CREB1; NPPA; CASP1; CASP9; SLC2A4; HDAC1; ITGB1; MMP13; MMP2; MMP3;                                                                                                                                                                                 |
| Arf6 trafficking events                                                | 64 | 1285 | 49.612 | 2.4287 | 8E-14 | 1E-10 | 6E-12 | 3E-11 | CDC25B; PCNA; SRC; TH; ODC1; FABP4; PPARG; ARG1; NOS2; NOS3; RELA; VEGFA; PRKCA; CXCL8; PRKCE; TNF; ABCG2; ABCB1; AKT2; AKT1; BAD; SIRT1; CCNA2; CYCS; RHOA; JUN; TNFRSF1A; ADRB2; HMOX1; ABCC1; IGFBP3; CDKN1A; HIF1A; IL2; HSPA8; PRKACA; RAC1;                                                                                                                                                                                                                                                                                                                                                                 |

|                                                    |    |      |        |        |       |       |       |       |                                                                                                                                                                                                                                                                                                                                                                                                                                                                                                                                                                                                                   |
|----------------------------------------------------|----|------|--------|--------|-------|-------|-------|-------|-------------------------------------------------------------------------------------------------------------------------------------------------------------------------------------------------------------------------------------------------------------------------------------------------------------------------------------------------------------------------------------------------------------------------------------------------------------------------------------------------------------------------------------------------------------------------------------------------------------------|
| Arf6 downstream pathway                            | 64 | 1285 | 49.612 | 2.4287 | 8E-14 | 1E-10 | 6E-12 | 3E-11 | ESR1; ACHE; DNMT3A; HSPA1A; HSP90AA1; NR4A1; SMAD3; STAT1; HSPD1; EGFR; FOS; MMP9; NFKB1; SERPINE1; CXCL12; CREB1; NPPA; CASP1; CASP9; SLC2A4; HDAC1; ITGB1; MMP13; MMP2; MMP3; CDC25B; PCNA; SRC; TH; ODC1; FABP4; PPARG; ARG1; NOS2; NOS3; RELA; VEGFA; PRKCA; CXCL8; PRKCE; TNF; ABCG2; ABCB1; AKT2; AKT1; BAD; SIRT1; CCNA2; CYCS; RHOA; JUN; TNFRSF1A; ADRB2; HMOX1; ABCC1; IGFBP3; CDKN1A; HIF1A; IL2; HSPA8; PRKACA; RAC1; ESR1; ACHE; DNMT3A; HSPA1A; HSP90AA1; NR4A1; SMAD3; STAT1; HSPD1; EGFR; FOS; MMP9; NFKB1; SERPINE1; CXCL12; CREB1; NPPA; CASP1; CASP9; SLC2A4; HDAC1; ITGB1; MMP13; MMP2; MMP3; |
| Signaling events mediated by focal adhesion kinase | 64 | 1285 | 49.612 | 2.4287 | 8E-14 | 1E-10 | 6E-12 | 3E-11 | CDC25B; PCNA; SRC; TH; ODC1; FABP4; PPARG; ARG1; NOS2; NOS3; RELA; VEGFA; PRKCA; CXCL8; PRKCE; TNF; ABCG2; ABCB1; AKT2; AKT1; BAD; SIRT1; CCNA2; CYCS; RHOA; JUN; TNFRSF1A; ADRB2; HMOX1; ABCC1; IGFBP3; CDKN1A; HIF1A; IL2; HSPA8; PRKACA; RAC1; ESR1; ACHE; DNMT3A; HSPA1A; HSP90AA1; NR4A1; SMAD3; STAT1; HSPD1; EGFR; FOS; MMP9; NFKB1; SERPINE1; CXCL12; CREB1; NPPA; CASP1; CASP9; SLC2A4; HDAC1; ITGB1; MMP13; MMP2; MMP3;                                                                                                                                                                                 |
| S1P1 pathway                                       | 64 | 1285 | 49.612 | 2.4287 | 8E-14 | 1E-10 | 6E-12 | 3E-11 | CDC25B; PCNA; SRC; TH; ODC1; FABP4; PPARG; ARG1; NOS2; NOS3; RELA; VEGFA; PRKCA; CXCL8; PRKCE; TNF; ABCG2; ABCB1; AKT2; AKT1; BAD; SIRT1; CCNA2; CYCS; RHOA; JUN; TNFRSF1A; ADRB2; HMOX1; ABCC1; IGFBP3; CDKN1A; HIF1A; IL2; HSPA8; PRKACA; RAC1; ESR1; ACHE; DNMT3A; HSPA1A; HSP90AA1; NR4A1; SMAD3; STAT1; HSPD1; EGFR; FOS; MMP9; NFKB1; SERPINE1; CXCL12; CREB1; NPPA; CASP1; CASP9; SLC2A4; HDAC1; ITGB1; MMP13; MMP2; MMP3;                                                                                                                                                                                 |
| EGFR-dependent Endothelin signaling events         | 64 | 1286 | 49.612 | 2.4268 | 8E-14 | 1E-10 | 6E-12 | 3E-11 | CDC25B; PCNA; SRC; TH; ODC1; FABP4; PPARG; ARG1; NOS2; NOS3; RELA; VEGFA; PRKCA; CXCL8; PRKCE; TNF; ABCG2; ABCB1; AKT2; AKT1; BAD; SIRT1; CCNA2; CYCS; RHOA; JUN; TNFRSF1A; ADRB2; HMOX1; ABCC1; IGFBP3; CDKN1A; HIF1A; IL2; HSPA8; PRKACA; RAC1;                                                                                                                                                                                                                                                                                                                                                                 |

|                                 |    |      |        |        |       |       |       |       |                                                                                                                                                                                                                                                                                                                                                                                                                                                                                                                                                                                                                        |
|---------------------------------|----|------|--------|--------|-------|-------|-------|-------|------------------------------------------------------------------------------------------------------------------------------------------------------------------------------------------------------------------------------------------------------------------------------------------------------------------------------------------------------------------------------------------------------------------------------------------------------------------------------------------------------------------------------------------------------------------------------------------------------------------------|
| IGF1 pathway                    | 64 | 1288 | 49.612 | 2.423  | 9E-14 | 1E-10 | 6E-12 | 3E-11 | ESR1; ACHE; DNMT3A; HSPA1A; HSP90AA1; NR4A1; SMAD3; STAT1; HSPD1; EGFR; FOS; MMP9; NFKB1; SERPINE1; CXCL12; CREB1; NPPA; CASP1; CASP9; SLC2A4; HDAC1; ITGB1; MMP13; MMP2; MMP3; CDC25B; PCNA; SRC; TH; ODC1; FABP4; PPARG; ARG1; NOS2; NOS3; RELA; VEGFA; PRKCA; CXCL8; PRKCE; TNF; ABCG2; ABCB1; AKT2; AKT1; BAD; SIRT1; CCNA2; CYCS; RHOA; JUN; TNFRSF1A; ADRB2; HMOX1; ABCC1; IGFBP3; CDKN1A; HIF1A; IL2; HSPA8; PRKACA; RAC1; ESR1; ACHE; DNMT3A; HSPA1A; HSP90AA1; NR4A1; SMAD3; STAT1; APP; HSPD1; EGFR; FOS; MMP9; NFKB1; SERPINE1; CXCL12; CREB1; NPPA; CASP1; CASP9; SLC2A4; HDAC1; ITGB1; MMP13; MMP2; MMP3; |
| TRAIL signaling pathway         | 65 | 1325 | 50.388 | 2.3922 | 9E-14 | 2E-10 | 6E-12 | 3E-11 | MMP3; CDC25B; PCNA; SRC; TH; ODC1; FABP4; PPARG; ARG1; NOS2; NOS3; RELA; VEGFA; PRKCA; CXCL8; PRKCE; TNF; ABCG2; ABCB1; AKT2; AKT1; BAD; SIRT1; CCNA2; CYCS; RHOA; JUN; TNFRSF1A; ADRB2; HMOX1; ABCC1; IGFBP3; CDKN1A; HIF1A; IL2; HSPA8; PRKACA; ESR1; ACHE; DNMT3A; HSPA1A; HSP90AA1; NR4A1; SMAD3; STAT1; HSPD1; EGFR; FOS; MMP9; NFKB1; SERPINE1; CXCL12; CREB1; NPPA; CASP1; CASP9; SLC2A4; HDAC1; ITGB1; MMP13; MMP2; MMP3;                                                                                                                                                                                      |
| GMCSF-mediated signaling events | 64 | 1289 | 49.612 | 2.4211 | 9E-14 | 2E-10 | 6E-12 | 3E-11 | CDC25B; PCNA; SRC; TH; ODC1; FABP4; PPARG; ARG1; NOS2; NOS3; RELA; VEGFA; PRKCA; CXCL8; PRKCE; TNF; ABCG2; ABCB1; AKT2; AKT1; BAD; SIRT1; CCNA2; CYCS; RHOA; JUN; TNFRSF1A; ADRB2; HMOX1; ABCC1; IGFBP3; CDKN1A; HIF1A; IL2; HSPA8; PRKACA; RAC1; ESR1; ACHE; DNMT3A; HSPA1A; HSP90AA1; NR4A1; SMAD3; STAT1; HSPD1; EGFR; FOS; MMP9; NFKB1; SERPINE1; CXCL12; CREB1; NPPA; CASP1; CASP9; SLC2A4; HDAC1; ITGB1; MMP13; MMP2; MMP3;                                                                                                                                                                                      |
| IL5-mediated signaling events   | 64 | 1289 | 49.612 | 2.4211 | 9E-14 | 2E-10 | 6E-12 | 3E-11 | CDC25B; PCNA; SRC; TH; ODC1; FABP4; PPARG; ARG1; NOS2; NOS3; RELA; VEGFA; PRKCA; CXCL8; PRKCE; TNF; ABCG2; ABCB1; AKT2; AKT1; BAD; SIRT1; CCNA2; CYCS; RHOA; JUN; TNFRSF1A; ADRB2; HMOX1; ABCC1; IGFBP3; CDKN1A; HIF1A; IL2; HSPA8; PRKACA; RAC1;                                                                                                                                                                                                                                                                                                                                                                      |

|                                                                        |    |      |        |        |       |       |       |       |                                                                                                                                                                                                                                                                                                                                                                                                                                                                                                                                                                                                                   |
|------------------------------------------------------------------------|----|------|--------|--------|-------|-------|-------|-------|-------------------------------------------------------------------------------------------------------------------------------------------------------------------------------------------------------------------------------------------------------------------------------------------------------------------------------------------------------------------------------------------------------------------------------------------------------------------------------------------------------------------------------------------------------------------------------------------------------------------|
| PDGF receptor signaling network                                        | 64 | 1290 | 49.612 | 2.4193 | 1E-13 | 2E-10 | 6E-12 | 3E-11 | ESR1; ACHE; DNMT3A; HSPA1A; HSP90AA1; NR4A1; SMAD3; STAT1; HSPD1; EGFR; FOS; MMP9; NFKB1; SERPINE1; CXCL12; CREB1; NPPA; CASP1; CASP9; SLC2A4; HDAC1; ITGB1; MMP13; MMP2; MMP3; CDC25B; PCNA; SRC; TH; ODC1; FABP4; PPARG; ARG1; NOS2; NOS3; RELA; VEGFA; PRKCA; CXCL8; PRKCE; TNF; ABCG2; ABCB1; AKT2; AKT1; BAD; SIRT1; CCNA2; CYCS; RHOA; JUN; TNFRSF1A; ADRB2; HMOX1; ABCC1; IGFBP3; CDKN1A; HIF1A; IL2; HSPA8; PRKACA; RAC1; ESR1; ACHE; DNMT3A; HSPA1A; HSP90AA1; NR4A1; SMAD3; STAT1; HSPD1; EGFR; FOS; MMP9; NFKB1; SERPINE1; CXCL12; CREB1; NPPA; CASP1; CASP9; SLC2A4; HDAC1; ITGB1; MMP13; MMP2; MMP3; |
| Signaling events mediated by Hepatocyte Growth Factor Receptor (c-Met) | 64 | 1290 | 49.612 | 2.4193 | 1E-13 | 2E-10 | 6E-12 | 3E-11 | CDC25B; PCNA; SRC; TH; ODC1; FABP4; PPARG; ARG1; NOS2; NOS3; RELA; VEGFA; PRKCA; CXCL8; PRKCE; TNF; ABCG2; ABCB1; AKT2; AKT1; BAD; SIRT1; CCNA2; CYCS; RHOA; JUN; TNFRSF1A; ADRB2; HMOX1; ABCC1; IGFBP3; CDKN1A; HIF1A; IL2; HSPA8; PRKACA; RAC1; ESR1; ACHE; DNMT3A; HSPA1A; HSP90AA1; NR4A1; SMAD3; STAT1; HSPD1; EGFR; FOS; MMP9; NFKB1; SERPINE1; CXCL12; CREB1; NPPA; CASP1; CASP9; SLC2A4; HDAC1; ITGB1; MMP13; MMP2; MMP3;                                                                                                                                                                                 |
| IL3-mediated signaling events                                          | 64 | 1292 | 49.612 | 2.4155 | 1E-13 | 2E-10 | 6E-12 | 3E-11 | CDC25B; PCNA; SRC; TH; ODC1; FABP4; PPARG; ARG1; NOS2; NOS3; RELA; VEGFA; PRKCA; CXCL8; PRKCE; TNF; ABCG2; ABCB1; AKT2; AKT1; BAD; SIRT1; CCNA2; CYCS; RHOA; JUN; TNFRSF1A; ADRB2; HMOX1; ABCC1; IGFBP3; CDKN1A; HIF1A; IL2; HSPA8; PRKACA; RAC1; ESR1; ACHE; DNMT3A; HSPA1A; HSP90AA1; NR4A1; SMAD3; STAT1; HSPD1; EGFR; FOS; MMP9; NFKB1; SERPINE1; CXCL12; CREB1; NPPA; CASP1; CASP9; SLC2A4; HDAC1; ITGB1; MMP13; MMP2; MMP3;                                                                                                                                                                                 |
| Nectin adhesion pathway                                                | 64 | 1292 | 49.612 | 2.4155 | 1E-13 | 2E-10 | 6E-12 | 3E-11 | CDC25B; PCNA; SRC; TH; ODC1; FABP4; PPARG; ARG1; NOS2; NOS3; RELA; VEGFA; PRKCA; CXCL8; PRKCE; TNF; ABCG2; ABCB1; AKT2; AKT1; BAD; SIRT1; CCNA2; CYCS; RHOA; JUN; TNFRSF1A; ADRB2; HMOX1; ABCC1; IGFBP3; CDKN1A; HIF1A; IL2; HSPA8; PRKACA; RAC1;                                                                                                                                                                                                                                                                                                                                                                 |

|                                                     |    |      |        |        |       |       |       |       |                                                                                                                                                                                                                                                                                                                                                                                                                                                                                                                                                                                                                   |
|-----------------------------------------------------|----|------|--------|--------|-------|-------|-------|-------|-------------------------------------------------------------------------------------------------------------------------------------------------------------------------------------------------------------------------------------------------------------------------------------------------------------------------------------------------------------------------------------------------------------------------------------------------------------------------------------------------------------------------------------------------------------------------------------------------------------------|
| Signaling events mediated by VEGFR1 and VEGFR2      | 64 | 1293 | 49.612 | 2.4136 | 1E-13 | 2E-10 | 6E-12 | 3E-11 | ESR1; ACHE; DNMT3A; HSPA1A; HSP90AA1; NR4A1; SMAD3; STAT1; HSPD1; EGFR; FOS; MMP9; NFKB1; SERPINE1; CXCL12; CREB1; NPPA; CASP1; CASP9; SLC2A4; HDAC1; ITGB1; MMP13; MMP2; MMP3; CDC25B; PCNA; SRC; TH; ODC1; FABP4; PPARG; ARG1; NOS2; NOS3; RELA; VEGFA; PRKCA; CXCL8; PRKCE; TNF; ABCG2; ABCB1; AKT2; AKT1; BAD; SIRT1; CCNA2; CYCS; RHOA; JUN; TNFRSF1A; ADRB2; HMOX1; ABCC1; IGFBP3; CDKN1A; HIF1A; IL2; HSPA8; PRKACA; RAC1; ESR1; ACHE; DNMT3A; HSPA1A; HSP90AA1; NR4A1; SMAD3; STAT1; HSPD1; EGFR; FOS; MMP9; NFKB1; SERPINE1; CXCL12; CREB1; NPPA; CASP1; CASP9; SLC2A4; HDAC1; ITGB1; MMP13; MMP2; MMP3; |
| PAR1-mediated thrombin signaling events             | 64 | 1296 | 49.612 | 2.4081 | 1E-13 | 2E-10 | 6E-12 | 3E-11 | CDC25B; PCNA; SRC; TH; ODC1; FABP4; PPARG; ARG1; NOS2; NOS3; RELA; VEGFA; PRKCA; CXCL8; PRKCE; TNF; ABCG2; ABCB1; AKT2; AKT1; BAD; SIRT1; CCNA2; CYCS; RHOA; JUN; TNFRSF1A; ADRB2; HMOX1; ABCC1; IGFBP3; CDKN1A; HIF1A; IL2; HSPA8; PRKACA; RAC1; ESR1; ACHE; DNMT3A; HSPA1A; HSP90AA1; NR4A1; SMAD3; STAT1; HSPD1; EGFR; FOS; MMP9; NFKB1; SERPINE1; CXCL12; CREB1; NPPA; CASP1; CASP9; SLC2A4; HDAC1; ITGB1; MMP13; MMP2; MMP3;                                                                                                                                                                                 |
| Thrombin/proteas e-activated receptor (PAR) pathway | 64 | 1297 | 49.612 | 2.4062 | 1E-13 | 2E-10 | 6E-12 | 3E-11 | CDC25B; PCNA; SRC; TH; ODC1; FABP4; PPARG; ARG1; NOS2; NOS3; RELA; VEGFA; PRKCA; CXCL8; PRKCE; TNF; ABCG2; ABCB1; AKT2; AKT1; BAD; SIRT1; CCNA2; CYCS; RHOA; JUN; TNFRSF1A; ADRB2; HMOX1; ABCC1; IGFBP3; CDKN1A; HIF1A; IL2; HSPA8; PRKACA; RAC1; ESR1; ACHE; DNMT3A; HSPA1A; HSP90AA1; NR4A1; SMAD3; STAT1; HSPD1; EGFR; FOS; MMP9; NFKB1; SERPINE1; CXCL12; CREB1; NPPA; CASP1; CASP9; SLC2A4; HDAC1; ITGB1; MMP13; MMP2; MMP3;                                                                                                                                                                                 |
| Syndecan-1-mediated signaling events                | 64 | 1297 | 49.612 | 2.4062 | 1E-13 | 2E-10 | 6E-12 | 3E-11 | CDC25B; PCNA; SRC; TH; ODC1; FABP4; PPARG; ARG1; NOS2; NOS3; RELA; VEGFA; PRKCA; CXCL8; PRKCE; TNF; ABCG2; ABCB1; AKT2; AKT1; BAD; SIRT1; CCNA2; CYCS; RHOA; JUN; TNFRSF1A; ADRB2; HMOX1; ABCC1; IGFBP3; CDKN1A; HIF1A; IL2; HSPA8; PRKACA; RAC1;                                                                                                                                                                                                                                                                                                                                                                 |



|                                             |    |      |        |        |       |       |       |       |                                                                                                                                                                                                                                                                                                                                                                                                                                                                                                                                                                                                                   |
|---------------------------------------------|----|------|--------|--------|-------|-------|-------|-------|-------------------------------------------------------------------------------------------------------------------------------------------------------------------------------------------------------------------------------------------------------------------------------------------------------------------------------------------------------------------------------------------------------------------------------------------------------------------------------------------------------------------------------------------------------------------------------------------------------------------|
| Plasma membrane estrogen receptor signaling | 64 | 1298 | 49.612 | 2.4044 | 1E-13 | 2E-10 | 6E-12 | 3E-11 | ESR1; ACHE; DNMT3A; HSPA1A; HSP90AA1; NR4A1; SMAD3; STAT1; HSPD1; EGFR; FOS; MMP9; NFKB1; SERPINE1; CXCL12; CREB1; NPPA; CASP1; CASP9; SLC2A4; HDAC1; ITGB1; MMP13; MMP2; MMP3; CDC25B; PCNA; SRC; TH; ODC1; FABP4; PPARG; ARG1; NOS2; NOS3; RELA; VEGFA; PRKCA; CXCL8; PRKCE; TNF; ABCG2; ABCB1; AKT2; AKT1; BAD; SIRT1; CCNA2; CYCS; RHOA; JUN; TNFRSF1A; ADRB2; HMOX1; ABCC1; IGFBP3; CDKN1A; HIF1A; IL2; HSPA8; PRKACA; RAC1; ESR1; ACHE; DNMT3A; HSPA1A; HSP90AA1; NR4A1; SMAD3; STAT1; HSPD1; EGFR; FOS; MMP9; NFKB1; SERPINE1; CXCL12; CREB1; NPPA; CASP1; CASP9; SLC2A4; HDAC1; ITGB1; MMP13; MMP2; MMP3; |
| VEGF and VEGFR signaling network            | 64 | 1301 | 49.612 | 2.3988 | 1E-13 | 2E-10 | 7E-12 | 3E-11 | CDC25B; PCNA; SRC; TH; ODC1; FABP4; PPARG; ARG1; NOS2; NOS3; RELA; VEGFA; PRKCA; CXCL8; PRKCE; TNF; ABCG2; ABCB1; AKT2; AKT1; BAD; SIRT1; CCNA2; CYCS; RHOA; JUN; TNFRSF1A; ADRB2; HMOX1; ABCC1; IGFBP3; CDKN1A; HIF1A; IL2; HSPA8; PRKACA; RAC1; ESR1; ACHE; DNMT3A; HSPA1A; HSP90AA1; NR4A1; SMAD3; STAT1; HSPD1; EGFR; FOS; MMP9; NFKB1; SERPINE1; CXCL12; CREB1; NPPA; CASP1; CASP9; SLC2A4; HDAC1; ITGB1; MMP13; MMP2; MMP3;                                                                                                                                                                                 |
| Alpha9 beta1 integrin signaling events      | 64 | 1302 | 49.612 | 2.397  | 2E-13 | 3E-10 | 7E-12 | 3E-11 | CDC25B; PCNA; SRC; TH; ODC1; FABP4; PPARG; ARG1; NOS2; NOS3; RELA; VEGFA; PRKCA; CXCL8; PRKCE; TNF; ABCG2; ABCB1; AKT2; AKT1; BAD; SIRT1; CCNA2; CYCS; RHOA; JUN; TNFRSF1A; ADRB2; HMOX1; ABCC1; IGFBP3; CDKN1A; HIF1A; IL2; HSPA8; PRKACA; RAC1; ESR1; ACHE; DNMT3A; HSPA1A; HSP90AA1; NR4A1; SMAD3; STAT1; HSPD1; EGFR; FOS; MMP9; NFKB1; SERPINE1; CXCL12; CREB1; NPPA; CASP1; CASP9; SLC2A4; HDAC1; ITGB1; MMP13; MMP2; MMP3;                                                                                                                                                                                 |
| Endothelins                                 | 64 | 1304 | 49.612 | 2.3933 | 2E-13 | 3E-10 | 7E-12 | 3E-11 | CDC25B; PCNA; SRC; TH; ODC1; FABP4; PPARG; ARG1; NOS2; NOS3; RELA; VEGFA; PRKCA; CXCL8; PRKCE; TNF; ABCG2; ABCB1; AKT2; AKT1; BAD; SIRT1; CCNA2; CYCS; RHOA; JUN; TNFRSF1A; ADRB2; HMOX1; ABCC1; IGFBP3; CDKN1A; HIF1A; IL2; HSPA8; PRKACA; RAC1;                                                                                                                                                                                                                                                                                                                                                                 |

|                                                 |    |      |        |        |       |       |       |       |                                                                                                                                                                                                                                                                                                                                                                                                                                                                                                                                                                                                                                                                                                                                                                                                                                                                                      |
|-------------------------------------------------|----|------|--------|--------|-------|-------|-------|-------|--------------------------------------------------------------------------------------------------------------------------------------------------------------------------------------------------------------------------------------------------------------------------------------------------------------------------------------------------------------------------------------------------------------------------------------------------------------------------------------------------------------------------------------------------------------------------------------------------------------------------------------------------------------------------------------------------------------------------------------------------------------------------------------------------------------------------------------------------------------------------------------|
| LKB1 signaling events                           | 64 | 1305 | 49.612 | 2.3915 | 2E-13 | 3E-10 | 7E-12 | 3E-11 | ESR1; ACHE; DNMT3A; HSPA1A; HSP90AA1; NR4A1; SMAD3; STAT1; HSPD1; EGFR; FOS; MMP9; NFKB1; SERPINE1; CXCL12; CREB1; NPPA; CASP1; CASP9; SLC2A4; HDAC1; ITGB1; MMP13; MMP2; MMP3; CDC25B; PCNA; SRC; TH; ODC1; FABP4; PPARG; ARG1; NOS2; NOS3; RELA; VEGFA; PRKCA; CXCL8; PRKCE; TNF; ABCG2; ABCB1; AKT2; AKT1; BAD; SIRT1; CCNA2; CYCS; RHOA; JUN; TNFRSF1A; ADRB2; HMOX1; ABCC1; IGFBP3; CDKN1A; HIF1A; IL2; HSPA8; PRKACA; RAC1; ESR1; ACHE; DNMT3A; HSPA1A; HSP90AA1; NR4A1; SMAD3; STAT1; HSPD1; EGFR; FOS; MMP9; NFKB1; SERPINE1; CXCL12; CREB1; NPPA; CASP1; CASP9; SLC2A4; HDAC1; ITGB1; MMP13; MMP2; MMP3; CDC25B; PCNA; SRC; TH; ODC1; FABP4; PPARG; ARG1; NOS2; NOS3; RELA; VEGFA; PRKCA; CXCL8; PRKCE; TNF; ABCG2; ABCB1; AKT2; AKT1; BAD; SIRT1; CCNA2; CYCS; RHOA; JUN; TNFRSF1A; ADRB2; HMOX1; ABCC1; IGFBP3; CDKN1A; HIF1A; IL2; HSPA8; PRKACA; RAC1; FGF2; IL6; HRAS; |
| Proteoglycan syndecan-mediated signaling events | 65 | 1342 | 50.388 | 2.3619 | 2E-13 | 3E-10 | 7E-12 | 3E-11 | ESR1; ACHE; DNMT3A; HSPA1A; HSP90AA1; NR4A1; SMAD3; STAT1; HSPD1; EGFR; FOS; MMP9; NFKB1; SERPINE1; CXCL12; CREB1; NPPA; CASP1; CASP9; SLC2A4; HDAC1; ITGB1; MMP13; MMP2; MMP3; CDC25B; PCNA; SRC; TH; ODC1; FABP4; PPARG; ARG1; NOS2; NOS3; RELA; VEGFA; PRKCA; CXCL8; PRKCE; TNF; ABCG2; ABCB1; AKT2; AKT1; BAD; SIRT1; CCNA2; CYCS; RHOA; JUN; TNFRSF1A; ADRB2; HMOX1; ABCC1; IGFBP3; CDKN1A; HIF1A; IL2; HSPA8; PRKACA; RAC1; FGF2; IL6; HRAS;                                                                                                                                                                                                                                                                                                                                                                                                                                   |
| Sphingosine 1-phosphate (S1P) pathway           | 64 | 1308 | 49.612 | 2.386  | 2E-13 | 3E-10 | 8E-12 | 3E-11 | ESR1; ACHE; DNMT3A; HSPA1A; HSP90AA1; NR4A1; SMAD3; STAT1; HSPD1; EGFR; FOS; MMP9; NFKB1; SERPINE1; CXCL12; CREB1; NPPA; CASP1; CASP9; SLC2A4; HDAC1; ITGB1; MMP13; MMP2; MMP3; CDC25B; PCNA; SRC; TH; ODC1; FABP4; PPARG; ARG1; NOS2; NOS3; RELA; VEGFA; PRKCA; CXCL8; PRKCE; TNF; ABCG2; ABCB1; AKT2; AKT1; BAD; SIRT1; CCNA2; CYCS; RHOA; JUN; TNFRSF1A; ADRB2; HMOX1; ABCC1; IGFBP3; CDKN1A; HIF1A; IL2; HSPA8; PRKACA; RAC1; ESR1; ACHE; DNMT3A; HSPA1A; HSP90AA1; NR4A1; SMAD3; STAT1; HSPD1; EGFR; FOS; MMP9; NFKB1; SERPINE1; CXCL12; CREB1; NPPA; CASP1; CASP9; SLC2A4; HDAC1; ITGB1; MMP13; MMP2; MMP3; CDC25B; PCNA; SRC; TH; ODC1; FABP4; PPARG; ARG1; NOS2; NOS3; RELA; VEGFA; PRKCA; CXCL8; PRKCE; TNF; ABCG2; ABCB1; AKT2; AKT1; BAD; SIRT1; CCNA2; CYCS; RHOA; JUN; TNFRSF1A; ADRB2; HMOX1; ABCC1; IGFBP3; CDKN1A; HIF1A; IL2; HSPA8; PRKACA; RAC1;                  |
| ErbB receptor signaling network                 | 64 | 1308 | 49.612 | 2.386  | 2E-13 | 3E-10 | 8E-12 | 3E-11 | ESR1; ACHE; DNMT3A; HSPA1A; HSP90AA1; NR4A1; SMAD3; STAT1; HSPD1; EGFR; FOS; MMP9; NFKB1; SERPINE1; CXCL12; CREB1; NPPA; CASP1; CASP9; SLC2A4; HDAC1; ITGB1; MMP13; MMP2; MMP3; CDC25B; PCNA; SRC; TH; ODC1; FABP4; PPARG; ARG1; NOS2; NOS3; RELA; VEGFA; PRKCA; CXCL8; PRKCE; TNF; ABCG2; ABCB1; AKT2; AKT1; BAD; SIRT1; CCNA2; CYCS; RHOA; JUN; TNFRSF1A; ADRB2; HMOX1; ABCC1; IGFBP3; CDKN1A; HIF1A; IL2; HSPA8; PRKACA; RAC1;                                                                                                                                                                                                                                                                                                                                                                                                                                                    |

|                                           |    |      |        |        |       |       |       |       |                                                                                                                                                                                                                                                                                                                                                                                                                                                                                                                                                                                                                                                                                                                                                 |
|-------------------------------------------|----|------|--------|--------|-------|-------|-------|-------|-------------------------------------------------------------------------------------------------------------------------------------------------------------------------------------------------------------------------------------------------------------------------------------------------------------------------------------------------------------------------------------------------------------------------------------------------------------------------------------------------------------------------------------------------------------------------------------------------------------------------------------------------------------------------------------------------------------------------------------------------|
| Beta1 integrin cell surface interactions  | 64 | 1348 | 49.612 | 2.3152 | 8E-13 | 1E-09 | 3E-11 | 1E-10 | ESR1; ACHE; DNMT3A; HSPA1A; HSP90AA1; NR4A1; SMAD3; STAT1; HSPD1; EGFR; FOS; MMP9; NFKB1; SERPINE1; CXCL12; CREB1; NPPA; CASP1; CASP9; SLC2A4; HDAC1; ITGB1; MMP13; MMP2; MMP3; CDC25B; PCNA; SRC; TH; ODC1; FABP4; PPARG; ARG1; NOS2; NOS3; RELA; VEGFA; PRKCA; CXCL8; PRKCE; TNF; ABCG2; ABCB1; AKT2; AKT1; BAD; SIRT1; CCNA2; CYCS; RHOA; JUN; TNFRSF1A; ADRB2; HMOX1; ABCC1; IGFBP3; CDKN1A; HIF1A; IL2; HSPA8; PRKACA; RAC1; ESR1; ACHE; HSP90AA1; NR4A1; SMAD3; STAT1; FOS; MMP9; NFKB1; SERPINE1; CXCL12; CREB1; NPPA; HDAC1; ITGB1; MMP2; CDC25B; SRC; TH; FABP4; PPARG; ARG1; NOS2; NOS3; RELA; VEGFA; PRKCA; CXCL8; PRKCE; TNF; ABCG2; ABCB1; AKT1; BAD; CCNA2; RHOA; JUN; HMOX1; CDKN1A; HIF1A; IL2; HSPA8; PRKACA; RAC1; IL6; HRAS; |
| CDC42 signaling events                    | 46 | 755  | 35.659 | 2.9712 | 2E-12 | 3E-09 | 6E-11 | 3E-10 | ESR1; ACHE; DNMT3A; HSPA1A; HSP90AA1; NR4A1; SMAD3; STAT1; HSPD1; EGFR; FOS; MMP9; NFKB1; SERPINE1; CXCL12; CREB1; NPPA; CASP1; CASP9; SLC2A4; HDAC1; ITGB1; MMP13; MMP2; MMP3; CDC25B; PCNA; SRC; TH; ODC1; FABP4; PPARG; ARG1; NOS2; NOS3; RELA; VEGFA; PRKCA; CXCL8; PRKCE; TNF; ABCG2; ABCB1; AKT2; AKT1; BAD; SIRT1; CCNA2; CYCS; RHOA; JUN; TNFRSF1A; ADRB2; HMOX1; ABCC1; IGFBP3; CDKN1A; HIF1A; IL2; HSPA8; PRKACA; RAC1; IL6; HRAS;                                                                                                                                                                                                                                                                                                    |
| Integrin family cell surface interactions | 64 | 1375 | 49.612 | 2.2697 | 2E-12 | 4E-09 | 8E-11 | 3E-10 | ESR1; ACHE; DNMT3A; HSPA1A; HSP90AA1; NR4A1; SMAD3; STAT1; HSPD1; EGFR; FOS; MMP9; NFKB1; SERPINE1; CXCL12; CREB1; NPPA; CASP1; CASP9; SLC2A4; HDAC1; ITGB1; MMP13; MMP2; MMP3; CDC25B; PCNA; SRC; TH; ODC1; FABP4; PPARG; ARG1; NOS2; NOS3; RELA; VEGFA; PRKCA; CXCL8; PRKCE; TNF; ABCG2; ABCB1; AKT2; AKT1; BAD; SIRT1; CCNA2; CYCS; RHOA; JUN; TNFRSF1A; ADRB2; HMOX1; ABCC1; IGFBP3; CDKN1A; HIF1A; IL2; HSPA8; PRKACA; RAC1; ESR1; ACHE; HSP90AA1; NR4A1; SMAD3; STAT1; FOS; MMP9; NFKB1; SERPINE1; CXCL12; CREB1; NPPA; HDAC1; ITGB1; MMP2; CDC25B; SRC; TH; FABP4; PPARG; ARG1; NOS2; NOS3; RELA; VEGFA; PRKCA; CXCL8; PRKCE; TNF; ABCG2; ABCB1; AKT1; BAD; CCNA2; RHOA; JUN; HMOX1; CDKN1A; HIF1A; IL2; HSPA8; PRKACA; RAC1; IL6; HRAS; |
| Regulation of CDC42 activity              | 46 | 768  | 35.659 | 2.9209 | 3E-12 | 5E-09 | 1E-10 | 5E-10 | CYP2C8; CYP19A1; CYP1A2; CYP2C9; CYP2C19; GSTP1; GCLC; CYP1B1; GSTM1; CYP1A1; MAOB; CYP17A1; CYP2B6; CYP3A4; MAOA; ALDH1A1; CYP2E1; CYP2C8; CYP19A1; CYP1A2; CYP2C9; CYP2C19; CYP1B1; CYP1A1; MAOB; CYP17A1; CYP2B6; CYP3A4; MAOA; ALDH1A1; CYP2E1;                                                                                                                                                                                                                                                                                                                                                                                                                                                                                             |
| Biological oxidations                     | 17 | 98   | 13.178 | 8.4618 | 8E-12 | 1E-08 | 3E-10 | 1E-09 |                                                                                                                                                                                                                                                                                                                                                                                                                                                                                                                                                                                                                                                                                                                                                 |
| Phase 1 - Functionalization of compounds  | 14 | 60   | 10.853 | 11.383 | 9E-12 | 1E-08 | 3E-10 | 1E-09 |                                                                                                                                                                                                                                                                                                                                                                                                                                                                                                                                                                                                                                                                                                                                                 |

|                                                          |    |     |        |        |       |       |       |       |                                                                                                                                                                            |
|----------------------------------------------------------|----|-----|--------|--------|-------|-------|-------|-------|----------------------------------------------------------------------------------------------------------------------------------------------------------------------------|
| TNF receptor signaling pathway                           | 27 | 299 | 20.93  | 4.4042 | 4E-11 | 6E-08 | 1E-09 | 5E-09 | ESR1; NR4A1; STAT1; APP; FOS; NFKB1; CREB1; CASP1; CASP9; CDC25B; SRC; TH; PPARG; NOS2; RELA; PRKCA; CXCL8; PRKCE; TNF; AKT1; BAD; CYCS; JUN; TNFRSF1A; IL2; PRKACA; RAC1; |
| Glucocorticoid receptor regulatory                       | 15 | 80  | 11.628 | 9.1467 | 5E-11 | 8E-08 | 2E-09 | 7E-09 | HSP90AA1; NR4A1; STAT1; FOS; NFKB1; CREB1; HDAC1; RELA; CXCL8; AKT1; JUN; CDKN1A; IL2; PRKACA; IL6;                                                                        |
| Xenobiotics                                              | 8  | 14  | 6.2016 | 27.875 | 7E-11 | 1E-07 | 2E-09 | 1E-08 | CYP2C8; CYP1A2; CYP2C9; CYP2C19; CYP1A1; CYP2B6; CYP3A4; CYP2E1;                                                                                                           |
| IL2-mediated signaling events                            | 17 | 115 | 13.178 | 7.211  | 1E-10 | 2E-07 | 4E-09 | 2E-08 | HSP90AA1; STAT1; FOS; NFKB1; SRC; RELA; PRKCA; PRKCE; TNF; AKT1; CCNA2; RHOA; JUN; TNFRSF1A; IL2; RAC1; HRAS;                                                              |
| ATF-2 transcription factor network                       | 13 | 59  | 10.078 | 10.749 | 1E-10 | 2E-07 | 4E-09 | 2E-08 | ESR1; ACHE; FOS; CREB1; MMP2; TH; ARG1; NOS2; PRKCA; CXCL8; CCNA2; JUN; IL6;                                                                                               |
| Glucocorticoid receptor signaling                        | 15 | 85  | 11.628 | 8.6087 | 1E-10 | 2E-07 | 4E-09 | 2E-08 | HSP90AA1; NR4A1; STAT1; FOS; NFKB1; CREB1; HDAC1; RELA; CXCL8; AKT1; JUN; CDKN1A; IL2;                                                                                     |
| IL1-mediated signaling events                            | 23 | 234 | 17.829 | 4.7941 | 2E-10 | 4E-07 | 7E-09 | 3E-08 | ESR1; NR4A1; FOS; NFKB1; CREB1; CASP1; IL1B; CDC25B; SRC; TH; PPARG; NOS2; RELA; PRKCA; CXCL8; PRKCE; TNF; BAD; JUN; TNFRSF1A; IL2; PRKACA; RAC1;                          |
| Integrins in angiogenesis                                | 13 | 64  | 10.078 | 9.9096 | 3E-10 | 6E-07 | 1E-08 | 4E-08 | HSP90AA1; FOS; MMP9; NFKB1; MMP2; SRC; RELA; VEGFA; AKT1; RHOA; JUN; RAC1; FGF2;                                                                                           |
| HIF-1-alpha transcription factor network                 | 13 | 66  | 10.078 | 9.6094 | 5E-10 | 8E-07 | 1E-08 | 6E-08 | SMAD3; FOS; SERPINE1; CXCL12; CREB1; NOS2; VEGFA; ABCG2; ABCB1; AKT1; JUN; HMOX1; HIF1A;                                                                                   |
| Hypoxic and oxygen homeostasis regulation of HIF-1-alpha | 14 | 80  | 10.853 | 8.5373 | 5E-10 | 9E-07 | 2E-08 | 7E-08 | HSP90AA1; SMAD3; FOS; SERPINE1; CXCL12; CREB1; NOS2; VEGFA; ABCG2; ABCB1; AKT1; JUN; HMOX1; HIF1A;                                                                         |
| Regulation of cytoplasmic and nuclear SMAD2/3 signaling  | 25 | 305 | 19.38  | 3.9979 | 2E-09 | 3E-06 | 5E-08 | 2E-07 | ESR1; NR4A1; SMAD3; FOS; SERPINE1; CREB1; HDAC1; CDC25B; SRC; TH; PPARG; NOS2; PRKCA; CXCL8; PRKCE; TNF; AKT1; BAD; RHOA; JUN; CDKN1A; IL2; HSPA8; PRKACA; RAC1;           |
| Regulation of nuclear SMAD2/3 signaling                  | 25 | 305 | 19.38  | 3.9979 | 2E-09 | 3E-06 | 5E-08 | 2E-07 | ESR1; NR4A1; SMAD3; FOS; SERPINE1; CREB1; HDAC1; CDC25B; SRC; TH; PPARG; NOS2; PRKCA; CXCL8; PRKCE; TNF; AKT1; BAD; RHOA; JUN; CDKN1A; IL2; HSPA8; PRKACA; RAC1;           |

|                                                                                   |    |     |        |        |       |       |       |       |                                                                                                                                                                  |
|-----------------------------------------------------------------------------------|----|-----|--------|--------|-------|-------|-------|-------|------------------------------------------------------------------------------------------------------------------------------------------------------------------|
| TGF-beta receptor signaling                                                       | 25 | 305 | 19.38  | 3.9979 | 2E-09 | 3E-06 | 5E-08 | 2E-07 | ESR1; NR4A1; SMAD3; FOS; SERPINE1; CREB1; HDAC1; CDC25B; SRC; TH; PPARG; NOS2; PRKCA; CXCL8; PRKCE; TNF; AKT1; BAD; RHOA; JUN; CDKN1A; IL2; HSPA8; PRKACA; RAC1; |
| Cytochrome P450<br>- arranged by<br>substrate type                                | 11 | 48  | 8.5271 | 11.181 | 2E-09 | 3E-06 | 6E-08 | 2E-07 | CYP2C8; CYP19A1; CYP1A2; CYP2C9; CYP2C19; CYP1B1; CYP1A1; CYP17A1; CYP2B6; CYP3A4; CYP2E1;                                                                       |
| Regulation of<br>p38-alpha and<br>p38-beta                                        | 18 | 164 | 13.953 | 5.3539 | 4E-09 | 7E-06 | 1E-07 | 5E-07 | ESR1; NR4A1; FOS; CREB1; CDC25B; SRC; TH; PPARG; NOS2; PRKCA; CXCL8; PRKCE; TNF; BAD; JUN; IL2; PRKACA; RAC1;                                                    |
| ALK1 signaling<br>events                                                          | 25 | 321 | 19.38  | 3.7986 | 5E-09 | 8E-06 | 1E-07 | 5E-07 | ESR1; NR4A1; SMAD3; FOS; SERPINE1; CREB1; HDAC1; CDC25B; SRC; TH; PPARG; NOS2; PRKCA; CXCL8; PRKCE; TNF; AKT1; BAD; RHOA; JUN; CDKN1A; IL2; HSPA8; PRKACA; RAC1; |
| ALK1 pathway                                                                      | 25 | 324 | 19.38  | 3.7634 | 6E-09 | 1E-05 | 2E-07 | 7E-07 | ESR1; NR4A1; SMAD3; FOS; SERPINE1; CREB1; HDAC1; CDC25B; SRC; TH; PPARG; NOS2; PRKCA; CXCL8; PRKCE; TNF; AKT1; BAD; RHOA; JUN; CDKN1A; IL2; HSPA8; PRKACA; RAC1; |
| IL23-mediated<br>signaling events                                                 | 12 | 66  | 9.3023 | 8.8708 | 6E-09 | 1E-05 | 2E-07 | 7E-07 | STAT1; NFKB1; MPO; IL1B; SRC; NOS2; RELA; PRKCA; TNF; TNFRSF1A; IL2; IL6;                                                                                        |
| CXCR4-mediated<br>signaling events                                                | 19 | 190 | 14.729 | 4.8779 | 8E-09 | 1E-05 | 2E-07 | 8E-07 | STAT1; FOS; MMP9; NFKB1; CXCL12; SRC; RELA; PRKCA; PRKCE; TNF; AKT1; BAD; RHOA; JUN; TNFRSF1A; IL2; PRKACA; RAC1; HRAS;                                          |
| Validated<br>transcriptional<br>targets of AP1<br>family members<br>Fra1 and Fra2 | 16 | 134 | 12.403 | 5.8248 | 1E-08 | 2E-05 | 3E-07 | 1E-06 | FOS; MMP9; MMP2; PPARG; NOS3; PRKCA; CXCL8; PRKCE; TNF; CCNA2; JUN; HMOX1; IL2; PRKACA; IL6; HRAS;                                                               |
| Signaling events<br>regulated by Ret<br>tyrosine kinase                           | 12 | 69  | 9.3023 | 8.4851 | 1E-08 | 2E-05 | 3E-07 | 1E-06 | NFKB1; CREB1; SRC; RELA; PRKCA; TNF; RHOA; JUN; TNFRSF1A; PRKACA; RAC1; HRAS;                                                                                    |
| Retinoic acid<br>receptors-<br>mediated                                           | 10 | 47  | 7.7519 | 10.382 | 3E-08 | 4E-05 | 6E-07 | 3E-06 | NR4A1; RARA; HDAC1; THRA; PPARG; PPARG; PRKCA; TNF; AKT1; PRKACA;                                                                                                |
| Downstream<br>signal                                                              | 12 | 75  | 9.3023 | 7.8064 | 3E-08 | 5E-05 | 7E-07 | 3E-06 | NR4A1; EGFR; CREB1; CASP9; SRC; PRKCA; PRKCE; AKT1; BAD; CDKN1A; PRKACA; HRAS;                                                                                   |

|                                        |    |     |        |        |       |        |       |       |                                                                                                               |
|----------------------------------------|----|-----|--------|--------|-------|--------|-------|-------|---------------------------------------------------------------------------------------------------------------|
| Syndecan-2-mediated signaling events   | 12 | 77  | 9.3023 | 7.6037 | 4E-08 | 7E-05  | 9E-07 | 4E-06 | STAT1; FOS; MMP9; ITGB1; MMP2; SRC; CXCL8; AKT1; RHOA; JUN; PRKACA; HRAS;                                     |
| p38 MAPK signaling pathway             | 18 | 189 | 13.953 | 4.6458 | 4E-08 | 7E-05  | 1E-06 | 4E-06 | ESR1; NR4A1; FOS; CREB1; CDC25B; SRC; TH; PPARG; NOS2; PRKCA; CXCL8; PRKCE; TNF; BAD; JUN; IL2; PRKACA; RAC1; |
| Signaling by PDGF                      | 12 | 78  | 9.3023 | 7.5062 | 5E-08 | 8E-05  | 1E-06 | 4E-06 | NR4A1; EGFR; CREB1; CASP9; SRC; PRKCA; PRKCE; AKT1; BAD; CDKN1A; PRKACA; HRAS;                                |
| Angiopoietin receptor Tie2-mediated    | 10 | 50  | 7.7519 | 9.759  | 5E-08 | 8E-05  | 1E-06 | 5E-06 | NFKB1; ITGB1; MMP2; NOS3; RELA; TNF; AKT1; CDKN1A; RAC1; FGF2;                                                |
| Signaling by FGFR                      | 13 | 95  | 10.078 | 6.6763 | 5E-08 | 9E-05  | 1E-06 | 5E-06 | NR4A1; EGFR; CREB1; CASP9; SRC; PRKCA; PRKCE; AKT1; BAD; CDKN1A; PRKACA; FGF2; HRAS;                          |
| Signaling by SCF-KIT                   | 11 | 66  | 8.5271 | 8.1322 | 7E-08 | 0.0001 | 2E-06 | 7E-06 | NR4A1; STAT1; MMP9; CREB1; CASP9; PRKCA; AKT1; BAD; CDKN1A; RAC1; HRAS;                                       |
| p75(NTR)-mediated signaling            | 17 | 178 | 13.178 | 4.6589 | 1E-07 | 0.0002 | 2E-06 | 9E-06 | APP; FOS; NFKB1; CREB1; CASP9; MMP3; SRC; RELA; PRKCA; TNF; AKT1; BAD; CYCS; RHOA; TNFRSF1A; RAC1; HRAS;      |
| Signalling by NGF                      | 15 | 143 | 11.628 | 5.1173 | 2E-07 | 0.0003 | 4E-06 | 2E-05 | NR4A1; NFKB1; CREB1; CASP9; SRC; RELA; PRKCA; PRKCE; AKT1; BAD; RHOA; CDKN1A; PRKACA; RAC1; HRAS;             |
| GAB1 signalosome                       | 8  | 32  | 6.2016 | 12.2   | 2E-07 | 0.0003 | 4E-06 | 2E-05 | NR4A1; EGFR; CREB1; CASP9; SRC; AKT1; BAD;                                                                    |
| IL12-mediated signaling events         | 13 | 111 | 10.078 | 5.714  | 3E-07 | 0.0006 | 7E-06 | 3E-05 | STAT1; FOS; NFKB1; IL1B; SRC; NOS2; RELA; PRKCA; TNF; JUN; TNFRSF1A; IL2; IL6;                                |
| Signaling by EGFR                      | 12 | 98  | 9.3023 | 5.9745 | 6E-07 | 0.001  | 1E-05 | 5E-05 | NR4A1; EGFR; CREB1; CASP9; SRC; PRKCA; PRKCE; AKT1; BAD; CDKN1A; PRKACA; HRAS;                                |
| BMP receptor signaling                 | 18 | 226 | 13.953 | 3.8852 | 6E-07 | 0.0011 | 1E-05 | 6E-05 | ESR1; NR4A1; FOS; CREB1; CDC25B; SRC; TH; PPARG; NOS2; PRKCA; CXCL8; PRKCE; TNF; BAD; JUN; IL2; PRKACA; RAC1; |
| ErbB2/ErbB3 signaling events           | 8  | 38  | 6.2016 | 10.275 | 7E-07 | 0.0012 | 1E-05 | 6E-05 | FOS; SRC; AKT1; BAD; JUN; PRKACA; RAC1; HRAS;                                                                 |
| Downstream signaling of activated FGFR | 10 | 66  | 7.7519 | 7.3935 | 7E-07 | 0.0012 | 1E-05 | 6E-05 | NR4A1; CREB1; CASP9; PRKCA; PRKCE; AKT1; BAD; CDKN1A; PRKACA; HRAS;                                           |
| IL2 signaling events mediated by PI3K  | 10 | 67  | 7.7519 | 7.2832 | 9E-07 | 0.0014 | 2E-05 | 7E-05 | HSP90AA1; NFKB1; SRC; RELA; PRKCA; TNF; AKT1; TNFRSF1A; IL2; RAC1;                                            |

|                                                             |    |     |        |        |       |        |       |        |                                                                                                 |
|-------------------------------------------------------------|----|-----|--------|--------|-------|--------|-------|--------|-------------------------------------------------------------------------------------------------|
| Regulation of Telomerase                                    | 10 | 68  | 7.7519 | 7.1761 | 1E-06 | 0.0016 | 2E-05 | 8E-05  | ESR1; HSP90AA1; SMAD3; EGFR; FOS; NFKB1; HDAC1; AKT1; JUN; IL2;                                 |
| amb2 Integrin signaling                                     | 8  | 40  | 6.2016 | 9.7609 | 1E-06 | 0.0019 | 2E-05 | 9E-05  | MMP9; NFKB1; MMP2; SRC; TNF; AKT1; RHOA; IL6;                                                   |
| Thromboxane A2 receptor signaling                           | 9  | 54  | 6.9767 | 8.1335 | 1E-06 | 0.002  | 2E-05 | 1E-04  | EGFR; SRC; NOS3; PRKCA; PRKCE; AKT1; RHOA; PRKACA; RAC1;                                        |
| VEGFR1 specific signals                                     | 7  | 29  | 5.4264 | 11.781 | 1E-06 | 0.0023 | 3E-05 | 0.0001 | HSP90AA1; NOS3; VEGFA; PRKCA; AKT1; HIF1A; PRKACA;                                              |
| Osteopontin-mediated events                                 | 7  | 29  | 5.4264 | 11.781 | 1E-06 | 0.0023 | 3E-05 | 0.0001 | FOS; MMP9; NFKB1; MMP2; RELA; JUN; RAC1;                                                        |
| NGF signalling via TRKA from the plasma membrane            | 12 | 107 | 9.3023 | 5.472  | 2E-06 | 0.0026 | 3E-05 | 0.0001 | NR4A1; CREB1; CASP9; SRC; PRKCA; PRKCE; AKT1; BAD; RHOA; CDKN1A; PRKACA; HRAS;                  |
| PI3K/AKT activation                                         | 7  | 30  | 5.4264 | 11.389 | 2E-06 | 0.003  | 3E-05 | 0.0001 | NR4A1; CREB1; CASP9; AKT1; BAD; RHOA; CDKN1A;                                                   |
| Endogenous TLR signaling                                    | 9  | 57  | 6.9767 | 7.7055 | 2E-06 | 0.0032 | 3E-05 | 0.0001 | TLR4; HSPD1; NFKB1; SRC; RELA; PRKCA; TNF; RHOA; TNFRSF1A;                                      |
| Interleukin-1 processing                                    | 4  | 6   | 3.1008 | 32.531 | 2E-06 | 0.0041 | 4E-05 | 0.0002 | NFKB1; CASP1; IL1B; RELA;                                                                       |
| Neurotransmitter Clearance In The Synaptic Cleft            | 4  | 6   | 3.1008 | 32.531 | 2E-06 | 0.0041 | 4E-05 | 0.0002 | ACHE; SLC22A2; SLC6A3; MAOA;                                                                    |
| TCR signaling in na&#xeff;ve CD4+ T cells                   | 13 | 133 | 10.078 | 4.7689 | 3E-06 | 0.0046 | 5E-05 | 0.0002 | FOS; NFKB1; SRC; RELA; PRKCA; PRKCE; TNF; AKT1; JUN; TNFRSF1A; IL2; PRKACA; HRAS;               |
| E-cadherin signaling in keratinocytes                       | 6  | 21  | 4.6512 | 13.947 | 3E-06 | 0.0047 | 5E-05 | 0.0002 | EGFR; SRC; AKT2; AKT1; RHOA; RAC1;                                                              |
| PIP3 activates AKT signaling                                | 6  | 21  | 4.6512 | 13.947 | 3E-06 | 0.0047 | 5E-05 | 0.0002 | NR4A1; CREB1; CASP9; AKT1; BAD; CDKN1A;                                                         |
| Role of Calcineurin-dependent NFAT signaling in lymphocytes | 11 | 95  | 8.5271 | 5.65   | 3E-06 | 0.0053 | 5E-05 | 0.0002 | NR4A1; FOS; PPARG; PRKCA; CXCL8; PRKCE; TNF; BAD; JUN; IL2; PRKACA;                             |
| RAC1 signaling pathway                                      | 16 | 205 | 12.403 | 3.8075 | 4E-06 | 0.0062 | 6E-05 | 0.0003 | ESR1; ACHE; FOS; CREB1; ITGB1; MMP2; TH; ARG1; NOS2; PRKCA; CXCL8; CCNA2; RHOA; JUN; RAC1; IL6; |

|                                                            |    |     |        |        |       |        |        |        |                                                                                                                                                                                                                                                                                                                                    |
|------------------------------------------------------------|----|-----|--------|--------|-------|--------|--------|--------|------------------------------------------------------------------------------------------------------------------------------------------------------------------------------------------------------------------------------------------------------------------------------------------------------------------------------------|
| Regulation of RAC1 activity                                | 16 | 205 | 12.403 | 3.8075 | 4E-06 | 0.0062 | 6E-05  | 0.0003 | ESR1; ACHE; FOS; CREB1; ITGB1; MMP2; TH; ARG1; NOS2; PRKCA; CXCL8; CCNA2; RHOA; JUN; RAC1; IL6;                                                                                                                                                                                                                                    |
| RhoA signaling pathway                                     | 16 | 205 | 12.403 | 3.8075 | 4E-06 | 0.0062 | 6E-05  | 0.0003 | ESR1; ACHE; FOS; CREB1; ITGB1; MMP2; TH; ARG1; NOS2; PRKCA; CXCL8; CCNA2; RHOA; JUN; RAC1; IL6;                                                                                                                                                                                                                                    |
| Regulation of RhoA activity                                | 16 | 205 | 12.403 | 3.8075 | 4E-06 | 0.0062 | 6E-05  | 0.0003 | ESR1; ACHE; FOS; CREB1; ITGB1; MMP2; TH; ARG1; NOS2; PRKCA; CXCL8; CCNA2; RHOA; JUN; RAC1; IL6;                                                                                                                                                                                                                                    |
| Signaling events mediated by PRL                           | 6  | 23  | 4.6512 | 12.735 | 5E-06 | 0.0084 | 8E-05  | 0.0003 | ITGB1; SRC; CCNA2; RHOA; CDKN1A; RAC1;                                                                                                                                                                                                                                                                                             |
| Aurora A signaling                                         | 9  | 64  | 6.9767 | 6.8629 | 5E-06 | 0.0086 | 8E-05  | 0.0003 | NFKB1; CDC25B; SRC; RELA; PRKCA; TNF; AKT1; TNFRSF1A; PRKACA;                                                                                                                                                                                                                                                                      |
| TCR signaling in naive CD8+ T cells                        | 12 | 127 | 9.3023 | 4.6103 | 1E-05 | 0.016  | 0.0002 | 0.0006 | FOS; NFKB1; SRC; RELA; PRKCA; PRKCE; TNF; AKT1; JUN; TNFRSF1A; IL2; HRAS;                                                                                                                                                                                                                                                          |
| Nongenotropic Androgen signaling                           | 6  | 26  | 4.6512 | 11.266 | 1E-05 | 0.0182 | 0.0002 | 0.0007 | FOS; CREB1; SRC; AKT1; RAC1; HRAS;                                                                                                                                                                                                                                                                                                 |
| RXR and RAR heterodimerization with other nuclear receptor | 6  | 26  | 4.6512 | 11.266 | 1E-05 | 0.0182 | 0.0002 | 0.0007 | NR4A1; RARA; THRA; PPARA; PPARG; TNF;                                                                                                                                                                                                                                                                                              |
| FAS (CD95) signaling pathway                               | 12 | 130 | 9.3023 | 4.504  | 1E-05 | 0.0204 | 0.0002 | 0.0008 | APP; NFKB1; CASP1; CASP9; SRC; RELA; PRKCA; TNF; AKT1; BAD; CYCS; TNFRSF1A; CYP2C8; CYP19A1; CYP1A2; CYP2C9; CYP2C19; GSTP1; HSPA1A; HSP90AA1; GCLC; DBH; CYP1B1; GSR; GSTM1; TH; ODC1; CYP1A1; ARG1; NOS3; MAOB; PRKCA; AKT1; CYP17A1; CYP2B6; CYP3A4; CYCS; NAMPT; MAOA; NQO1; ALDH1A1; HMOX1; ASNS; HSPA8; PRKACA; XDH; CYP2E1; |
| Metabolism                                                 | 35 | 823 | 27.132 | 2.074  | 1E-05 | 0.0219 | 0.0002 | 0.0008 | NR4A1; CREB1; CASP9; AKT1; BAD; CDKN1A;                                                                                                                                                                                                                                                                                            |
| PI-3K cascade                                              | 6  | 27  | 4.6512 | 10.849 | 1E-05 | 0.023  | 0.0002 | 0.0009 | ESR1; HSP90AA1; NFKB1; HDAC1; PPARG; RELA; TNF; SIRT1; TNFRSF1A; CDKN1A; PRKACA;                                                                                                                                                                                                                                                   |
| Signaling events mediated by HDAC Class I                  | 11 | 113 | 8.5271 | 4.7501 | 2E-05 | 0.0289 | 0.0003 | 0.0011 | CASP9; AKT1; BAD; CDKN1A;                                                                                                                                                                                                                                                                                                          |
| AKT phosphorylates targets in the cytosol                  | 4  | 9   | 3.1008 | 21.699 | 2E-05 | 0.0328 | 0.0003 | 0.0012 | NFKB1; SRC; RELA; PRKCA; TNF; AKT1; JUN; TNFRSF1A;                                                                                                                                                                                                                                                                                 |
| CD40/CD40L signaling                                       | 8  | 58  | 6.2016 | 6.7322 | 2E-05 | 0.034  | 0.0003 | 0.0013 |                                                                                                                                                                                                                                                                                                                                    |



|                             |    |     |        |        |       |        |        |        |                                                                          |
|-----------------------------|----|-----|--------|--------|-------|--------|--------|--------|--------------------------------------------------------------------------|
| EGFR1                       | 12 | 138 | 9.3023 | 4.2429 | 2E-05 | 0.0375 | 0.0003 | 0.0014 | STAT1; EGFR; FOS; SNCA; CREB1; CASP9; SRC; PRKCA; AKT1; JUN; RAC1; HRAS; |
| Signaling by Aurora kinases | 10 | 98  | 7.7519 | 4.9796 | 3E-05 | 0.047  | 0.0004 | 0.0017 | NFKB1; CDC25B; SRC; RELA; PRKCA; TNF; AKT1; RHOA; TNFRSF1A; PRKACA;      |

---
